# Supplementary material for: Uncovering Protein Prenylation in Th1 Cells: Novel Prenylation Sites and Insights into Statin and Farnesyltransferase Inhibition
Source: Research Square preprint supplement (doi:10.21203/rs.3.rs-6305485/v1), 2025-04-01
Supplement: Supplementary file 1 [file 0a3e3e44a07e3a5827c78d6c.pdf]

## **Uncovering Protein Prenylation in Th1 Cells: Novel Prenylation Sites and Insights into Statin and Farnesyltransferase Inhibition**

Jana Koch<sup>1,2,3</sup>, Alessandra Ruggia<sup>1,4</sup>, Carina Beha<sup>1</sup>, Irina Wipf<sup>1</sup>, Damir Zhakparov<sup>1,2</sup>, Patrick Westermann<sup>1</sup>, Svenja Schmelzer<sup>1</sup>, Anja Heider<sup>1</sup>, Klemens Fröhlich<sup>4</sup>, Katja Baerenfaller<sup>1,2</sup>

1 Swiss Institute of Allergy and Asthma Research, University of Zurich, Davos, Switzerland

2 Swiss Institute of Bioinformatics, Lausanne, Switzerland

3 Institute for Theoretical Medicine, University of Augsburg, Augsburg, Germany

4 ETH Library, ETH Zurich, Zurich, Switzerland

5 Proteomics Center, Basel, Switzerland

### **Supplementary Material**

## Supplementary Tables

**Supplementary Table S1:** Summary of the identified proteins in the experiment with activated and non-activated Th1 cells, and in activated Th1 cells pretreated or not with statin, together with information on the sites of prenylation. Provided as separate Supplementary Material.

**Supplementary Table S2:** Proteins with a discrepancy in the annotated and the experimental prenylation moiety.

| ID     | name     | annotated_moiety                                                              | position | evidenceCode                | publication                                                       | experimental_moiety                 | motif |
|--------|----------|-------------------------------------------------------------------------------|----------|-----------------------------|-------------------------------------------------------------------|-------------------------------------|-------|
| O15498 | YKT6     | farnesyl cys                                                                  | -4       | ECO_0000269                 | doi:10.1073/pnas.0401183101                                       | farnesyl cys,<br>geranylgeranyl cys | CAAX  |
| P09543 | CN37,CNP | farnesyl cys                                                                  | -4       | ECO_0000250                 |                                                                   | farnesyl cys,<br>geranylgeranyl cys | CXXX  |
| P04899 | GNAI2    | farnesyl cys                                                                  | -4       | extended_search             | doi:10.1039/c3mb70593e                                            | geranylgeranyl cys                  | CAAX  |
| O95164 | UBL3     | geranylgeranyl cys                                                            | -4       | ECO_0000305                 | doi:10.1074/jbc.m602283200                                        | farnesyl cys                        | CAAX  |
| P20340 | RAB6A    | geranylgeranyl cys                                                            | [-3, -1] | ECO_0000250                 |                                                                   | farnesyl cys                        | CXC   |
| P50151 | GBG10    | geranylgeranyl cys                                                            | -4       | ECO_0000269                 | doi:10.1074/jbc.270.37.21765                                      | farnesyl cys                        | CAAX  |
| Q15669 | RHOH     | geranylgeranyl cys                                                            | -4       | ECO_0000250                 |                                                                   | farnesyl cys                        | CXXX  |
| Q8WV99 | ZFN2B    | geranylgeranyl cys                                                            | -4       | ECO_0000250                 |                                                                   | farnesyl cys                        | CXXX  |
| Q96S21 | RB40C    | geranylgeranyl cys                                                            | -4       | ECO_0000250                 |                                                                   | farnesyl cys                        | CXXX  |
| Q9BRT3 | MIEN1    | geranylgeranyl cys                                                            | -4       | ECO_0000269                 | doi:10.1074/jbc.m111.254599,<br>doi:10.1038/onc.2009.145          | farnesyl cys                        | CAAX  |
| Q9UK08 | GBG8     | geranylgeranyl cys                                                            | -4       | ECO_0000250                 |                                                                   | farnesyl cys                        | CAAX  |
| Q9Y3L5 | RAP2C    | geranylgeranyl cys                                                            | -4       | ECO_0000250                 |                                                                   | farnesyl cys                        | CAAX  |
| P08134 | RHOC     | geranylgeranyl cys                                                            | -4       | ECO_0000250                 |                                                                   | farnesyl cys,<br>geranylgeranyl cys | CXXX  |
| P11233 | RALA     | geranylgeranyl cys                                                            | -4       | ECO_0000269                 | doi:10.1128/mcb.00057-07,<br>doi:10.1016/s0021-9258(18)92889-9    | farnesyl cys,<br>geranylgeranyl cys | CXXX  |
| P11234 | RALB     | geranylgeranyl cys                                                            | -4       | ECO_0000269                 | doi:10.1128/mcb.00057-07                                          | farnesyl cys,<br>geranylgeranyl cys | CXXX  |
| P15153 | RAC2     | geranylgeranyl cys                                                            | -4       | ECO_0000269                 | doi:10.1016/s0021-9258(18)92889-9                                 | farnesyl cys,<br>geranylgeranyl cys | CXXX  |
| P32456 | GBP2     | geranylgeranyl cys                                                            | -4       | ECO_0000269                 | doi:10.1371/journal.pone.0014246                                  | farnesyl cys,<br>geranylgeranyl cys | CXXX  |
| P51159 | RB27A    | geranylgeranyl cys                                                            | [-3, -1] | ECO_0000250                 |                                                                   | farnesyl cys,<br>geranylgeranyl cys | CXC   |
| P59768 | GBG2     | geranylgeranyl cys                                                            | -4       | ECO_0000250                 |                                                                   | farnesyl cys,<br>geranylgeranyl cys | CAAX  |
| P60953 | CDC42    | geranylgeranyl cys                                                            | -4       | ECO_0007744,<br>ECO_0000269 | doi:10.1016/s0092-8674(00)80670-4                                 | farnesyl cys,<br>geranylgeranyl cys | CAAX  |
| P61006 | RAB8A    | geranylgeranyl cys                                                            | -4       | ECO_0000269                 | doi:10.1016/0014-5793(93)80897-4                                  | farnesyl cys,<br>geranylgeranyl cys | CAAX  |
| P61026 | RAB10    | geranylgeranyl cys                                                            | [-2, -1] | ECO_0000250                 |                                                                   | farnesyl cys,<br>geranylgeranyl cys | CC    |
| P61224 | RAP1B    | geranylgeranyl cys                                                            | -4       | ECO_0000269                 | doi:10.1073/pnas.87.22.8960                                       | farnesyl cys,<br>geranylgeranyl cys | CXXX  |
| P61225 | RAP2B    | geranylgeranyl cys                                                            | -4       | ECO_0000269                 | doi:10.1042/bj2890349                                             | farnesyl cys,<br>geranylgeranyl cys | CAAX  |
| P61586 | RHOA     | geranylgeranyl cys                                                            | -4       | ECO_0000250                 |                                                                   | farnesyl cys,<br>geranylgeranyl cys | CAAX  |
| P63000 | RAC1     | geranylgeranyl cys                                                            | -4       | ECO_0000269                 | doi:10.1016/s0021-9258(18)92889-9                                 | farnesyl cys,<br>geranylgeranyl cys | CAAX  |
| P63218 | GBG5     | geranylgeranyl cys                                                            | -4       | ECO_0000250                 |                                                                   | farnesyl cys,<br>geranylgeranyl cys | CXXX  |
| P84095 | RHOG     | geranylgeranyl cys                                                            | -4       | ECO_0000250                 |                                                                   | farnesyl cys,<br>geranylgeranyl cys | CAAX  |
| Q14088 | RB33A    | geranylgeranyl cys                                                            | [-3, -1] | ECO_0000250                 |                                                                   | farnesyl cys,<br>geranylgeranyl cys | CXC   |
| Q86YS6 | RAB43    | geranylgeranyl cys                                                            | [-3, -1] | ECO_0000250                 |                                                                   | farnesyl cys,<br>geranylgeranyl cys | CXC   |
| Q92930 | RAB8B    | geranylgeranyl cys                                                            | -4       | ECO_0000250                 |                                                                   | farnesyl cys,<br>geranylgeranyl cys | CXXX  |
| Q96PP8 | GBP5     | geranylgeranyl cys                                                            | -4       | ECO_0000269                 | doi:10.1371/journal.pone.0014246                                  | farnesyl cys,<br>geranylgeranyl cys | CAAX  |
| Q9H0U4 | RAB1B    | geranylgeranyl cys                                                            | [-2, -1] | ECO_0000269                 | doi:10.1042/bj3181007                                             | farnesyl cys,<br>geranylgeranyl cys | CC    |
| P62745 | RHOB     | geranylgeranyl cys in endosomal form,<br>farnesyl cys in plasma membrane form | -4       | ECO_0000269                 | doi:10.1074/jbc.270.14.7864,<br>doi:10.1016/s0021-9258(19)88661-1 | farnesyl cys                        | CXXX  |

**Supplementary Table S3:** Proteins with the new prenylation motifs CXXX, CXX, CX, and CCC

| Protein_ID | Protein_Name | Experimental moiety | non_canonical isoform | PositionC<br>New_Motif<br>CXXX | PositionC<br>New_Motif<br>CXX | PositionC<br>New_Motif<br>CX | PositionCs<br>New_Motif<br>CCC |
|------------|--------------|---------------------|-----------------------|--------------------------------|-------------------------------|------------------------------|--------------------------------|
| P27487     | DPP4         | F-Az & GG-Az        |                       | -5                             |                               |                              |                                |
| Q9NZC3     | GDE1         | GG-Az               |                       | -5                             |                               |                              |                                |
| Q69YN4     | KIAA1429     | F-Az & GG-Az        | 4                     | -5                             |                               |                              |                                |
| Q68DE3     | KIAA2018     | F-Az                |                       | -5                             |                               |                              |                                |
| Q8N4C8     | MINK1        | GG-Az               |                       | -5                             |                               |                              |                                |
| Q9NZJ7     | MTCH1        | F-Az & GG-Az        |                       | -5                             |                               |                              |                                |
| Q9UBB6     | NCDN         | GG-Az               |                       | -5                             |                               |                              |                                |
| Q8TD19     | NEK9         | F-Az                |                       | -5                             |                               |                              |                                |
| Q8WXH0     | SYNE2        | F-Az & GG-Az        | 8                     | -5                             |                               |                              |                                |
| Q93038     | TNFRSF25     | GG-Az               | 4                     | -5                             |                               |                              |                                |
| Q9C0C9     | UBE20        | F-Az                |                       | -5                             |                               |                              |                                |
| A6NN14     | ZNF729       | GG-Az               |                       | -5                             |                               |                              |                                |
| Q8N6S5     | ARL6IP6      | GG-Az               |                       |                                | -3                            |                              |                                |
| Q07812     | BAX          | F-Az & GG-Az        | 5                     |                                | -3                            |                              |                                |
| P01024     | C3           | F-Az                |                       |                                | -3                            |                              |                                |
| Q9BSY4     | CHCHD5       | F-Az                | 2                     |                                | -3                            |                              |                                |
| Q6NVY1     | HIBCH        | GG-Az               | 2                     |                                | -3                            |                              |                                |
| P10321     | HLA-C        | F-Az                |                       |                                | -3                            |                              |                                |
| P35914     | HMGCL        | F-Az                |                       |                                | -3                            |                              |                                |
| P22234     | PAICS        | F-Az                |                       |                                | -3                            |                              |                                |
| P15151     | PVR          | F-Az & GG-Az        | 4                     |                                | -3                            |                              |                                |
| Q00765     | REEP5        | F-Az & GG-Az        | 2                     |                                | -3                            |                              |                                |
| P23921     | RRM1         | F-Az                |                       |                                | -3                            |                              |                                |
| O95562     | SFT2D2       | F-Az & GG-Az        |                       |                                | -3                            |                              |                                |
| P41440     | SLC19A1      | GG-Az               | 3                     |                                | -3                            |                              |                                |
| O75558     | STX11        | F-Az & GG-Az        |                       |                                | -3                            |                              |                                |
| Q8NBK3     | SUMF1        | F-Az                | 3                     |                                | -3                            |                              |                                |
| Q7Z403     | TMC6         | F-Az                | 4                     |                                | -3                            |                              |                                |
| Q9Y294     | ASF1A        | F-Az                |                       |                                |                               | -2                           |                                |
| Q92556     | ELMO1        | F-Az                |                       |                                |                               | -2                           |                                |
| Q9BUT9     | FAM195A      | F-Az                |                       |                                |                               | -2                           |                                |
| Q14331     | FRG1         | F-Az                |                       |                                |                               | -2                           |                                |
| O94927     | HAUS5        | F-Az                |                       |                                |                               | -2                           |                                |
| Q15365     | PCBP1        | F-Az                |                       |                                |                               | -2                           |                                |
| P22307     | SCP2         | F-Az                | 3                     |                                |                               | -2                           |                                |
| Q9UHD2     | TBK1         | F-Az                |                       |                                |                               | -2                           |                                |
| Q86T03     | TMEM55B      | F-Az & GG-Az        | 3                     |                                |                               | -2                           |                                |
| O95985     | TOP3B        | F-Az & GG-Az        | 3                     |                                |                               | -2                           |                                |
| P67936     | TPM4         | F-Az                |                       |                                |                               | -2                           |                                |
| Q96CW5     | TUBGCP3      | F-Az & GG-Az        | 2                     |                                |                               | -2                           |                                |
| Q8N806     | UBR7         | F-Az                |                       |                                |                               | -2                           |                                |
| O14980     | XPO1         | F-Az & GG-Az        |                       |                                |                               | -2                           |                                |
| P43403     | ZAP70        | F-Az                |                       |                                |                               | -2                           |                                |
| Q8IZ83     | ALDH16A1     | F-Az                | 2                     |                                |                               |                              | [-3, -2, -1]                   |

**Supplementary Table S4:** Proteins with exactly one internal, potentially prenylated cysteine.

| Protein_ID | Protein_Name | Experimental moiety | non_canonical isoform | Position C Internal C_1 | Sequence Internal_Motif |
|------------|--------------|---------------------|-----------------------|-------------------------|-------------------------|
| Q9BQE5     | APOL2        | F-Az                |                       | -172                    | VAGITCSVVEL             |
| P53367     | ARFIP1       | GG-Az               |                       | -236                    | LNTYKCTRQII             |
| P36542     | ATP5C1       | F-Az                |                       | -196                    | SDRGLCGAIHS             |
| Q16836     | HADH         | F-Az                |                       | -104                    | KHPVSCKDTPG             |
| Q8N4V1     | MMGT1        | GG-Az               |                       | -75                     | AFAVTCYGIVH             |
| P00395     | MT-CO1       | F-Az                |                       | -16                     | EWLYGCPPPYH             |
| P00414     | MT-CO3       | F-Az & GG-Az        |                       | -44                     | TFLTICFIRQL             |
| O00483     | NDUFA4       | F-Az & GG-Az        |                       | -38                     | FNPDVCWDRNN             |
| O75438     | NDUFB1       | F-Az                |                       | -34                     | GFVIGCYLDRK             |
| Q92968     | PEX13        | GG-Az               |                       | -184                    | EGTVACLGAED             |
| Q96M27     | PRRC1        | F-Az                |                       | -98                     | WFDIGCLVVED             |
| Q5XKP0     | QIL1         | F-Az                |                       | -59                     | FSQYVCQQTGL             |
| P60468     | SEC61B       | F-Az & GG-Az        |                       | -58                     | RKNASCGRSA              |
| P60059     | SEC61G       | F-Az                |                       | -44                     | RLVKRCTKPDR             |
| Q99720     | SIGMAR1      | F-Az & GG-Az        |                       | -130                    | WMGAMCLLHAS             |
| P0DJ93     | SMIM13       | F-Az & GG-Az        |                       | -67                     | LLLMVCGWYFV             |
| Q8N131     | TMEM123      | F-Az & GG-Az        |                       | -22                     | ILYIGCKMYYS             |
| Q9BTV4     | TMEM43       | F-Az & GG-Az        |                       | -47                     | KAF AFCVATSL            |
| Q9UMX0     | UBQLN1       | F-Az                | 4                     | -28                     |                         |
| Q9UDW1     | UQCR10       | F-Az                | 2                     | -9                      |                         |
| P63027     | VAMP2        | GG-Az               |                       | -14                     | ILGVICAILI              |
| Q9BV40     | VAMP8        | F-Az & GG-Az        |                       | -20                     | MIVLICVIVFI             |

**Supplementary Table S5:** The 49 proteins that were significantly less farnesylated upon FTI treatment with the information on their prenylation motif, whether they have been known to be prenylated (0 = not known; 1 = known), and whether they have been identified before as significantly enriched in samples treated with F-Az (0 = not identified, 1 = identified in any F-Az treated samples in Th1 cells activated versus non-activated and activated Th1 cells pretreated or not with statin).

| Protein_ID | Protein_Name | Motif    | Known prenylated | Identified in F-Az before |
|------------|--------------|----------|------------------|---------------------------|
| Q9Y3P9     | RABGAP1      | C        | 0                | 1                         |
| Q8NDI1     | EHBP1        | CaaX     | 0                | 0                         |
| Q8N3D4     | EHBP1L1      | CaaX     | 0                | 1                         |
| O14610     | GNGT2        | CaaX     | 1                | 1                         |
| P01112     | HRAS         | CaaX     | 1                | 1                         |
| Q27J81     | INF2         | CaaX     | 0                | 1                         |
| P01116     | KRAS         | CaaX     | 1                | 1                         |
| P20700     | LMNB1        | CaaX     | 1                | 1                         |
| P01111     | NRAS         | CaaX     | 1                | 1                         |
| P40855     | PEX19        | CaaX     | 1                | 1                         |
| O43900     | PRICKLE3     | CaaX     | 0                | 1                         |
| P51157     | RAB28        | CaaX     | 1                | 1                         |
| Q9Y3L5     | RAP2C        | CaaX     | 1                | 1                         |
| P62070     | RRAS2        | CaaX     | 1                | 1                         |
| O15498     | YKT6         | CaaX     | 1                | 1                         |
| O95236     | APOL3        | CXXX     | 0                | 1                         |
| Q5VW32     | BROX         | CXXX     | 1                | 1                         |
| P49454     | CENPF        | CXXX     | 1                | 1                         |
| Q6P2H3     | CEP85        | CXXX     | 1                | 1                         |
| Q5SZL2     | CEP85L       | CXXX     | 0                | 1                         |
| Q5TAQ9     | DCAF8        | CXXX     | 1                | 1                         |
| P31689     | DNAJA1       | CXXX     | 1                | 1                         |
| O60884     | DNAJA2       | CXXX     | 1                | 1                         |
| Q8WW22     | DNAJA4       | CXXX     | 1                | 1                         |
| Q9BVM2     | DPCD         | CXXX     | 1                | 1                         |
| Q8IW50     | FAM219A      | CXXX     | 0                | 1                         |
| P32455     | GBP1         | CXXX     | 1                | 1                         |
| P02545     | LMNA         | CXXX     | 1                | 0                         |
| Q03252     | LMNB2        | CXXX     | 1                | 1                         |
| Q32MZ4     | LRRFIP1      | CXXX     | 1                | 1                         |
| Q16644     | MAPKAPK3     | CXXX     | 0                | 1                         |
| P55209     | NAP1L1       | CXXX     | 1                | 1                         |
| Q99733     | NAP1L4       | CXXX     | 1                | 1                         |
| Q93096     | PTP4A1       | CXXX     | 1                | 1                         |
| Q12974     | PTP4A2       | CXXX     | 1                | 1                         |
| P10114     | RAP2A        | CXXX     | 1                | 1                         |
| Q15382     | RHEB         | CXXX     | 1                | 1                         |
| Q15669     | RHOH         | CXXX     | 1                | 1                         |
| Q4ADV7     | RIC1         | CXXX     | 0                | 0                         |
| Q96EA4     | SPDL1        | CXXX     | 0                | 1                         |
| Q6PHR2     | ULK3         | CXXX     | 1                | 1                         |
| Q8N5D0     | WDTC1        | CXXX     | 0                | 1                         |
| Q8WV99     | ZFAND2B      | CXXX     | 1                | 1                         |
| Q9UI42     | CBPA4        | Internal | 0                | 0                         |
| P41567     | EIF1         | Internal | 0                | 0                         |
| P52292     | IMA1         | Internal | 0                | 0                         |
| Q8IUC0     | KR131        | Internal | 0                | 0                         |
| Q8N0X7     | SPART        | Internal | 0                | 0                         |
| Q969T9     | WBP2         | Internal | 0                | 0                         |

**Supplementary Table S6:** Differentially expressed proteins in total extracts comparing activated and non-activated Th1 cells. Provided as separate Supplementary Material.

**Supplementary Table S7:** The 63 proteins that were significantly differentially prenylated comparing activated and non-activated Th1 cells; see Supplementary Table S8 for the full list of 179 differentially prenylated proteins and the filtering.

| Protein Name | Protein ID | Known prenylated | Average FC | FAz_Act vs FAz_non-act p.adj | FAz_Act vs FAz_non-act log_fc | GGAz_Act vs GGAz_non-act p.adj | GGAz_Act vs GGAz_non-act log_fc |
|--------------|------------|------------------|------------|------------------------------|-------------------------------|--------------------------------|---------------------------------|
| GNG4         | P50150     | GNG4             | 5.38       |                              |                               | 6.89E-03                       | 5.380                           |
| NDFIP2       | Q9NV92     |                  | 5.01       |                              |                               | 1.14E-13                       | 5.010                           |
| KDM6B        | O15054     |                  | 4.95       | 6.28E-14                     | 4.950                         |                                |                                 |
| CD9          | P21926     |                  | 4.12       |                              |                               | 5.79E-04                       | 4.120                           |
| CD69         | Q07108     |                  | 4.065      | 6.28E-14                     | 3.450                         | 1.48E-09                       | 4.680                           |
| RAD21L1      | Q9H4I0     |                  | 3.67       | 3.00E-03                     | 3.670                         |                                |                                 |
| ZNF697       | Q5TEC3     |                  | 3.415      | 1.10E-02                     | 3.730                         | 4.87E-02                       | 3.100                           |
| TNFRSF25     | Q93038     |                  | 3.01       |                              |                               | 1.56E-04                       | 3.010                           |
| RBM19        | Q9Y4C8     |                  | 2.72       |                              |                               | 1.14E-13                       | 2.720                           |
| VDR          | P11473     |                  | 2.545      | 3.39E-02                     | 2.170                         | 3.21E-10                       | 2.920                           |
| GNG12        | Q9UBI6     | GNG12            | 2.5        | 3.19E-09                     | 2.500                         |                                |                                 |
| NDFIP1       | Q9BT67     |                  | 2.27       |                              |                               | 4.41E-03                       | 2.270                           |
| NCOA2        | Q15596     |                  | 2.1        |                              |                               | 1.10E-07                       | 2.100                           |
| CD82         | P27701     |                  | 2.035      | 6.28E-14                     | 2.400                         | 2.35E-09                       | 1.670                           |
| FNDC3B       | Q53EP0     |                  | 2.03       | 2.36E-11                     | 2.030                         |                                |                                 |
| PVR          | P15151     |                  | 2.01       | 1.05E-03                     | 2.010                         |                                |                                 |
| SLC39A14     | Q15043     |                  | 1.935      | 6.65E-03                     | 1.810                         | 7.03E-03                       | 2.060                           |
| TRPS1        | Q9UHF7     |                  | 1.83       | 3.12E-03                     | 1.830                         |                                |                                 |
| CD63         | P08962     |                  | 1.67       | 1.14E-02                     | 1.670                         |                                |                                 |
| ARID5A       | Q03989     |                  | 1.61       |                              |                               | 5.95E-03                       | 1.610                           |
| GNAQ         | P50148     |                  | 1.49       |                              |                               | 8.35E-05                       | 1.490                           |
| DPAGT1       | Q9H3H5     |                  | 1.48       | 6.28E-14                     | 1.480                         |                                |                                 |
| PNO1         | Q9NRX1     |                  | 1.46       |                              |                               | 8.03E-03                       | 1.460                           |
| SYNGAP1      | Q96PV0     |                  | 1.41       |                              |                               | 2.09E-04                       | 1.410                           |
| TYSND1       | Q2T9J0     |                  | 1.39       | 6.40E-03                     | 1.390                         |                                |                                 |
| SLC38A1      | Q9H2H9     |                  | 1.36       | 3.83E-05                     | 1.360                         |                                |                                 |
| IL2RA        | P01589     |                  | 1.33       |                              |                               | 3.91E-02                       | 1.330                           |
| CD44         | P16070     |                  | 1.28       | 6.80E-03                     | 1.110                         | 9.84E-11                       | 1.450                           |
| NAF1         | Q96HR8     |                  | 1.23       |                              |                               | 2.57E-05                       | 1.230                           |
| CYP51A1      | Q16850     |                  | 1.21       | 2.43E-02                     | 1.210                         |                                |                                 |
| NSDHL        | Q15738     |                  | 1.09       | 1.79E-03                     | 1.090                         |                                |                                 |
| GFI1         | Q99684     |                  | 1.08       | 1.35E-02                     | 1.080                         |                                |                                 |
| ZNF267       | Q14586     |                  | 1.08       |                              |                               | 2.47E-02                       | 1.080                           |
| FAM60A       | Q9NP50     |                  | 1.04       | 2.15E-03                     | 1.040                         |                                |                                 |
| BZW2         | Q9Y6E2     |                  | 0.923      |                              |                               | 2.28E-02                       | 0.923                           |
| BMS1         | Q14692     |                  | 0.868      | 4.83E-02                     | 0.868                         |                                |                                 |
| RFTN1        | Q14699     |                  | 0.859      | 1.49E-02                     | 0.859                         |                                |                                 |
| ATN1         | P54259     |                  | 0.843      |                              |                               | 4.88E-02                       | 0.843                           |
| ZNF16        | P17020     |                  | 0.833      |                              |                               | 3.78E-03                       | 0.833                           |
| SRA1         | Q9HD15     |                  | 0.769      | 7.52E-03                     | 0.769                         |                                |                                 |
| VASP         | P50552     |                  | 0.683      | 7.07E-03                     | 0.683                         |                                |                                 |
| ZMYND11      | Q15326     |                  | -0.611     |                              |                               | 4.49E-02                       | -0.611                          |
| VEZF1        | Q14119     |                  | -0.626     |                              |                               | 4.94E-02                       | -0.626                          |
| ZMYM3        | Q14202     |                  | -0.667     | 1.06E-02                     | -0.667                        |                                |                                 |
| ZNF44        | P15621     |                  | -0.724     |                              |                               | 4.43E-02                       | -0.724                          |
| ZBTB14       | O43829     |                  | -0.745     | 1.67E-02                     | -0.745                        |                                |                                 |
| BTBD11       | A6QL63     |                  | -0.785     | 3.63E-02                     | -0.785                        |                                |                                 |
| ZNF792       | Q3KQV3     |                  | -0.88      | 7.44E-03                     | -0.880                        |                                |                                 |
| PRKCQ        | Q04759     |                  | -0.935     | 2.13E-03                     | -0.935                        |                                |                                 |
| CD3D         | P04234     |                  | -0.94      |                              |                               | 1.12E-03                       | -0.940                          |
| CD3E         | P07766     |                  | -1         |                              |                               | 4.13E-02                       | -1.000                          |
| ZNF565       | Q8N9K5     |                  | -1.05      | 3.52E-06                     | -1.050                        |                                |                                 |
| GBP1         | P32455     | GBP1             | -1.39      | 3.34E-02                     | -1.390                        |                                |                                 |
| CRACR2A      | Q9BSW2     | CRACR2A          | -1.54      |                              |                               | 1.60E-02                       | -1.540                          |
| RAB28        | P51157     | RAB28            | -1.63      | 4.93E-03                     | -1.630                        |                                |                                 |
| SELPLG       | Q14242     |                  | -1.84      |                              |                               | 1.45E-08                       | -1.840                          |
| S1PR4        | Q95977     |                  | -2.04      | 1.19E-03                     | -1.930                        | 7.58E-03                       | -2.150                          |
| PTP4A1       | Q93096     | PTP4A1           | -2.24      | 6.55E-05                     | -2.240                        |                                |                                 |
| ZNF518B      | Q9C0D4     |                  | -2.35      | 2.41E-03                     | -2.350                        |                                |                                 |
| RHOH         | Q15669     | RHOH             | -2.4       | 4.08E-03                     | -2.400                        |                                |                                 |
| CXCR3        | P49682     |                  | -2.45      |                              |                               | 1.98E-02                       | -2.450                          |
| ICAM2        | P13598     |                  | -2.5       |                              |                               | 1.14E-13                       | -2.500                          |
| INF2         | Q27J81     |                  | -2.85      | 3.68E-02                     | -2.850                        |                                |                                 |

**Supplementary Table S8:** Differentially prenylated proteins comparing activated and non-activated Th1 cells. Provided as separate Supplementary Material.

**Supplementary Table S9:** Differentially expressed proteins in total extracts comparing activated Th1 cells pretreated or not with statin. Provided as separate Supplementary Material.

**Supplementary Table S10:** Differentially prenylated proteins comparing activated Th1 cells pretreated or not with statin. Provided as separate Supplementary Material.

## Supplementary Figures

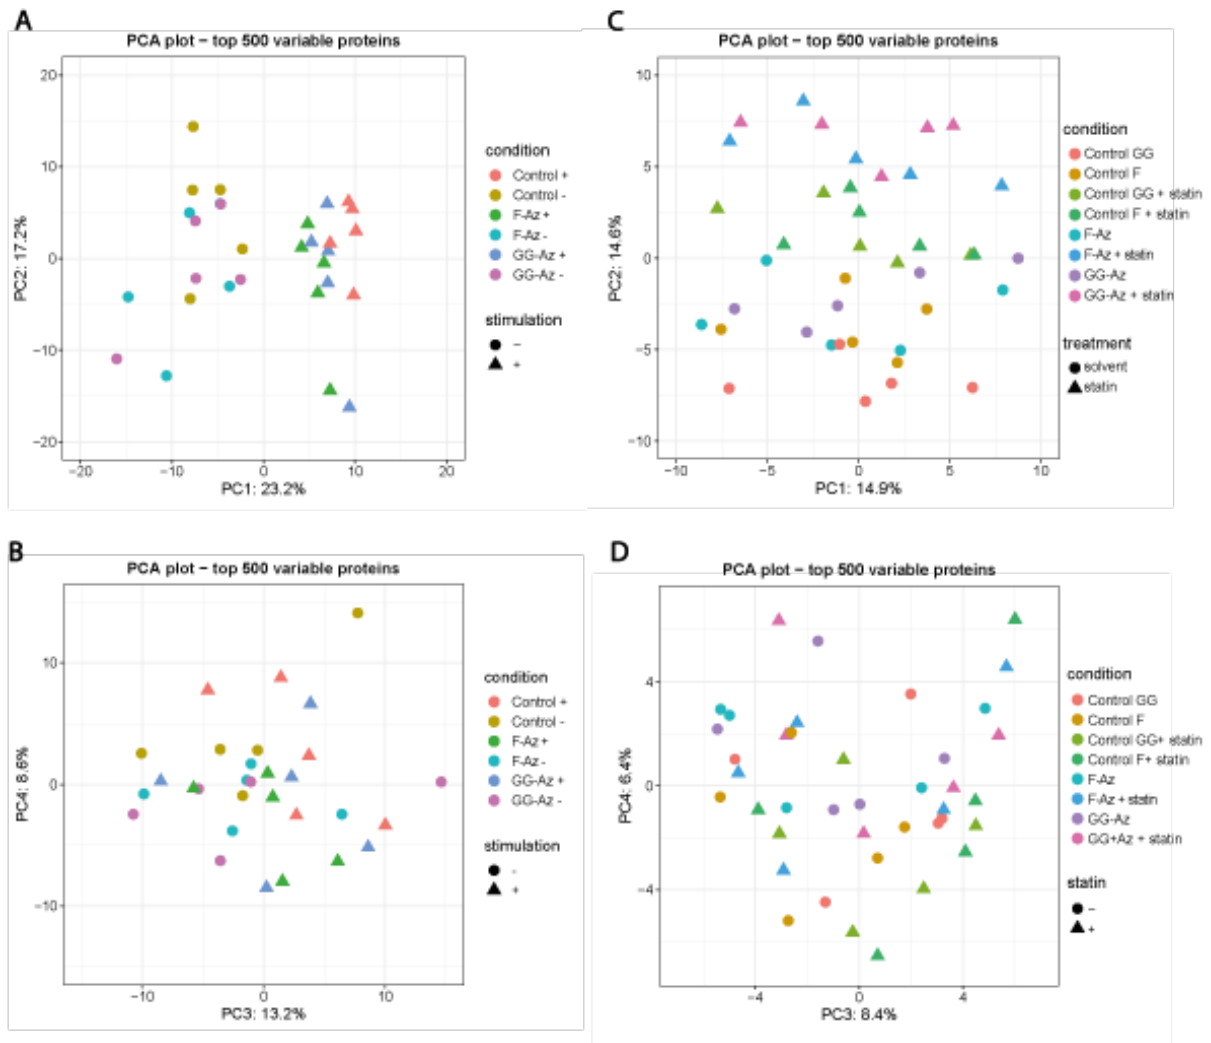

**Supplementary Figure S1:** PCA plots of the top 500 variable proteins in total extract samples. A) PC1 against PC2, and B) PC3 against PC4 from the PCA of the top 500 variable proteins in the total extract samples of activated and non-activated Th1 cells treated with GG-Az, F-Az or mock treatment. C) PC1 against PC2, and D) PC3 against PC4 from the PCA of the top 500 variable proteins in the total extract samples of activated Th1 cells pretreated or not with statin and treated with GG-Az, F-Az or mock treatment.



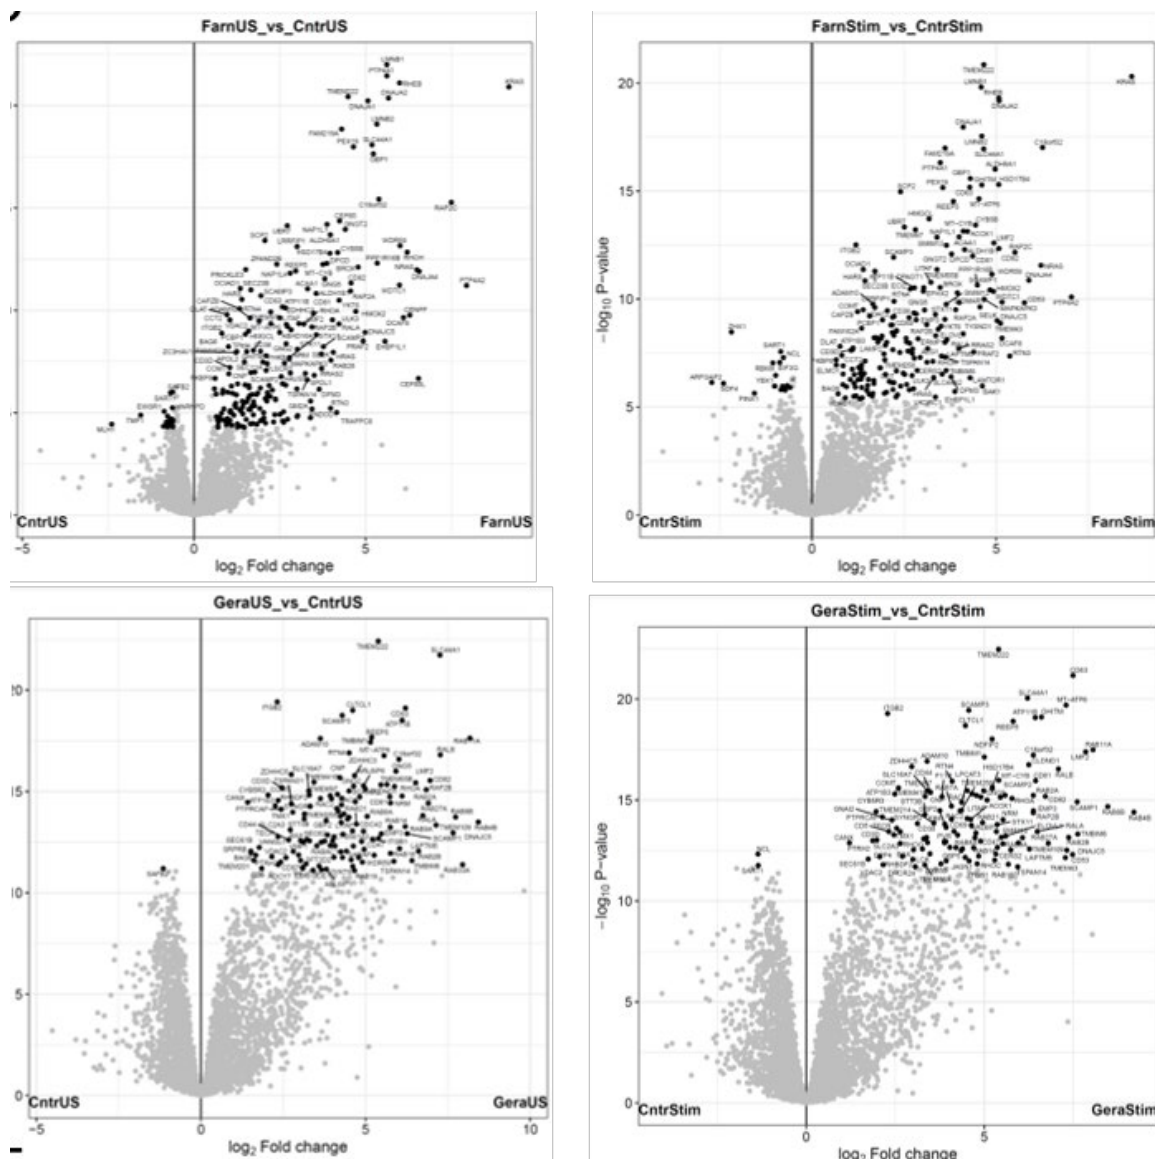

**Supplementary Figure S2:** Volcano plots of the enrichment samples comparing farnesylated (top) and geranylgeranylated proteins (bottom) to the respective background controls in non-stimulated (left) and stimulated (right) Th1 cells.

A)

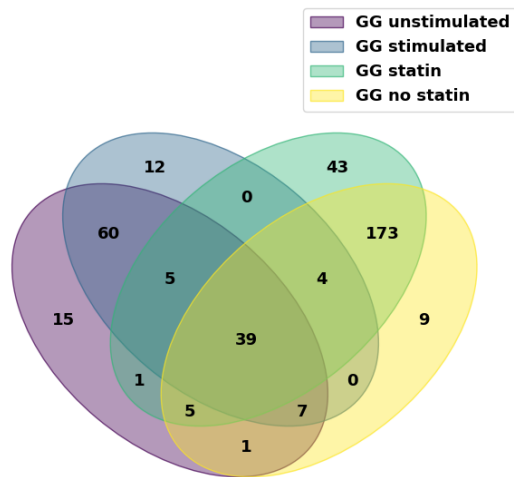

B)

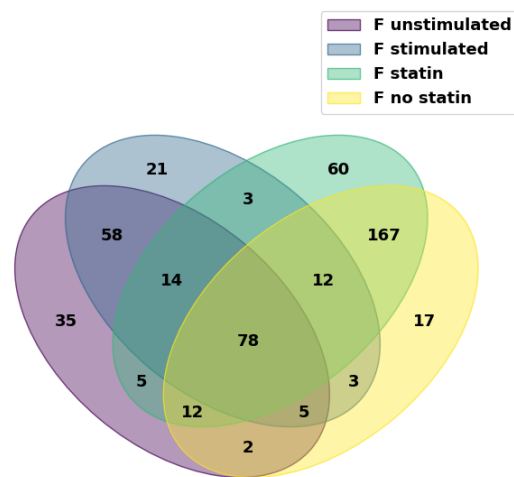

**Supplementary Figure S3:** Venn diagrams showing the overlaps between the significantly enriched proteins in: A) GG-Az-treated and B) F-Az-treated activated and non-activated Th1 cells, as well as in activated Th1 cells pretreated or not pretreated with statin, compared to their respective mock-treated background controls.

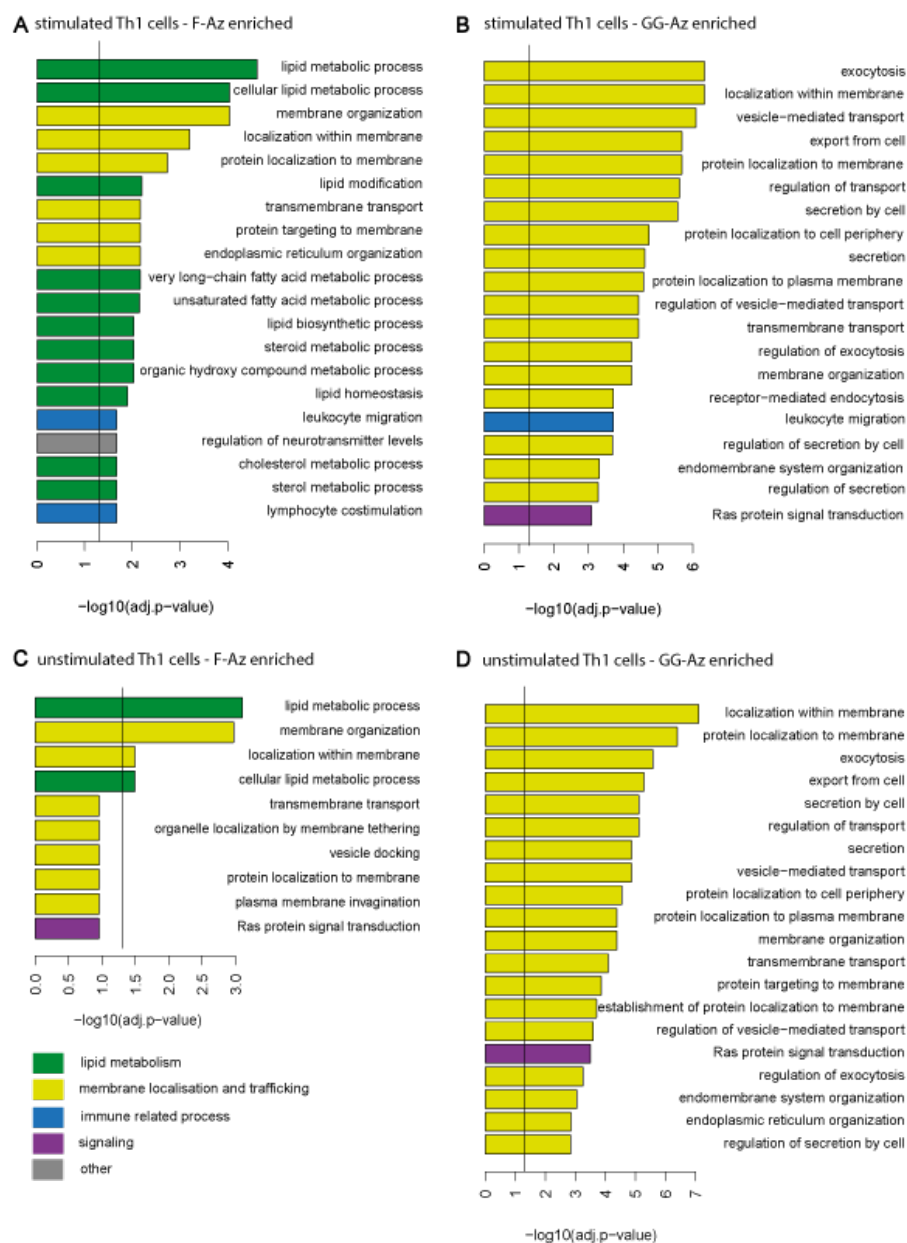

**Supplementary Figure S4:** Enriched Gene Ontology Biological Process (GO-BP) terms in the significantly enriched prenylated proteins in A) activated Th1 cells treated with F-Az, B) activated Th1 cells treated with GG-Az, (C) non-activated Th1 cells treated with F-Az, and D) non-activated Th1 cells treated with GG-Az.

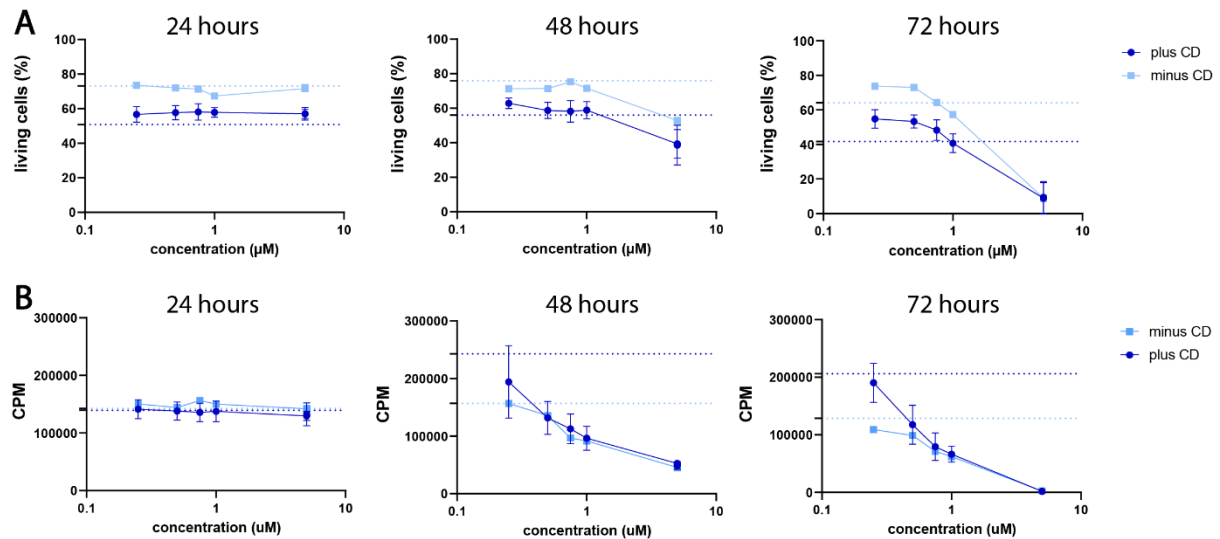

**Supplementary Figure S5:** Pitavastatin kinetics and optimal concentrations were assessed over 1–3 days using inhibition of proliferation with minimal cell death as the readout using *in vitro*-differentiated Th1 cells that were either activated with anti-CD3/anti-CD8 antibodies (dark blue) or left non-activated (light blue). Analysis of A) cell proliferation with the H3-thymidine incorporation assay and of B) cell viability with the live dead staining using propidium iodide in cells treated with Pitavastatin at the indicated concentrations for 24, 48, and 72 hours. The mean CPMs and percentages of living cells in activated and non-activated Th1 cells without statin treatment are indicated with dotted lines. CPM: counts per minute.

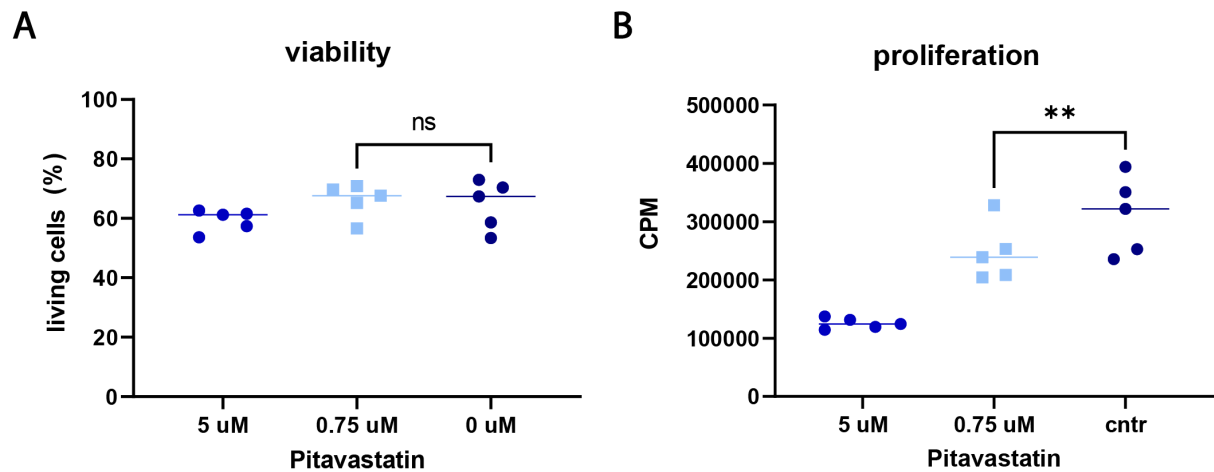

**Supplementary Figure S6:** Analysis of cell viability using live/dead staining (A) and cell proliferation using the H3-thymidine incorporation assay (B) of the Th1 cells used in the experiment, confirming that 0.75  $\mu$ M Pitavastatin significantly reduced cell proliferation without causing a significant change in the percentage of living cells. PI: propidium iodide, CPM: counts per minute.

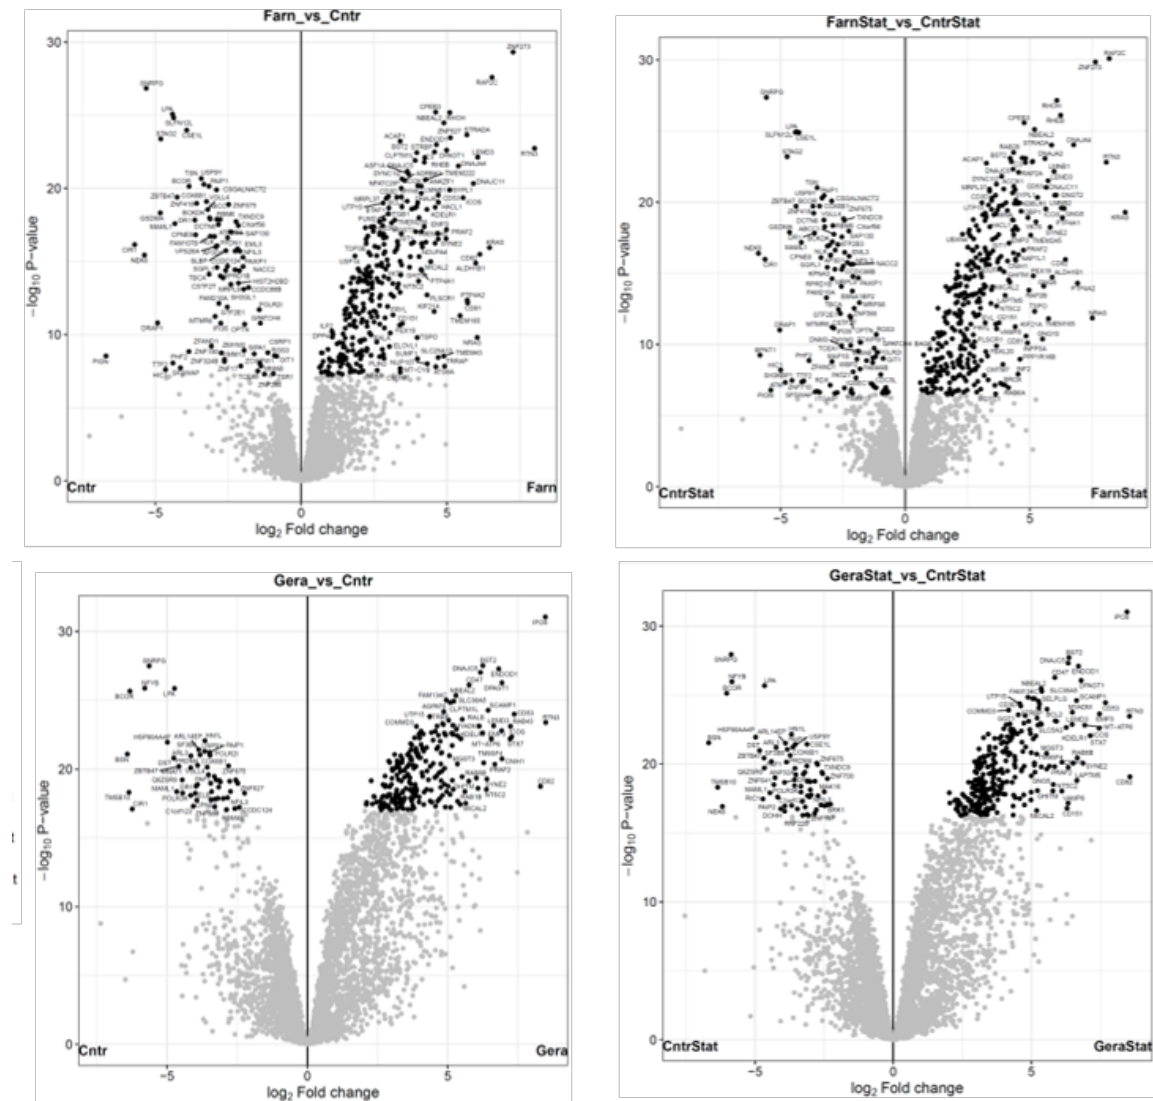

**Supplementary Figure S7:** Volcano plots of the enrichment samples comparing proteins identified in samples treated with F-Az (top) or GG-Az (bottom) to the respective background controls without isoprenoid addition, in activated Th1 cells either not pretreated with statin (left) or pretreated with statin (right).

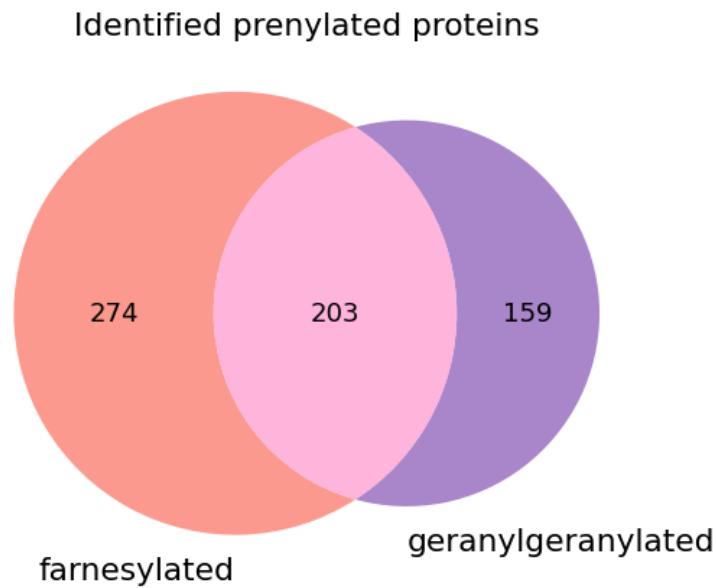

**Supplementary Figure S8:** Venn diagram illustrating the significantly enriched farnesylated and geranylgeranylated proteins identified through statistical analyses comparing proteins enriched in F-Az or GG-Az-treated samples to their respective mock-treated background controls. All significantly enriched proteins containing a cysteine in any of their isoforms were included. The results encompass experiments with both activated and non-activated Th1 cells, as well as activated Th1 cells pretreated or not pretreated with statin.

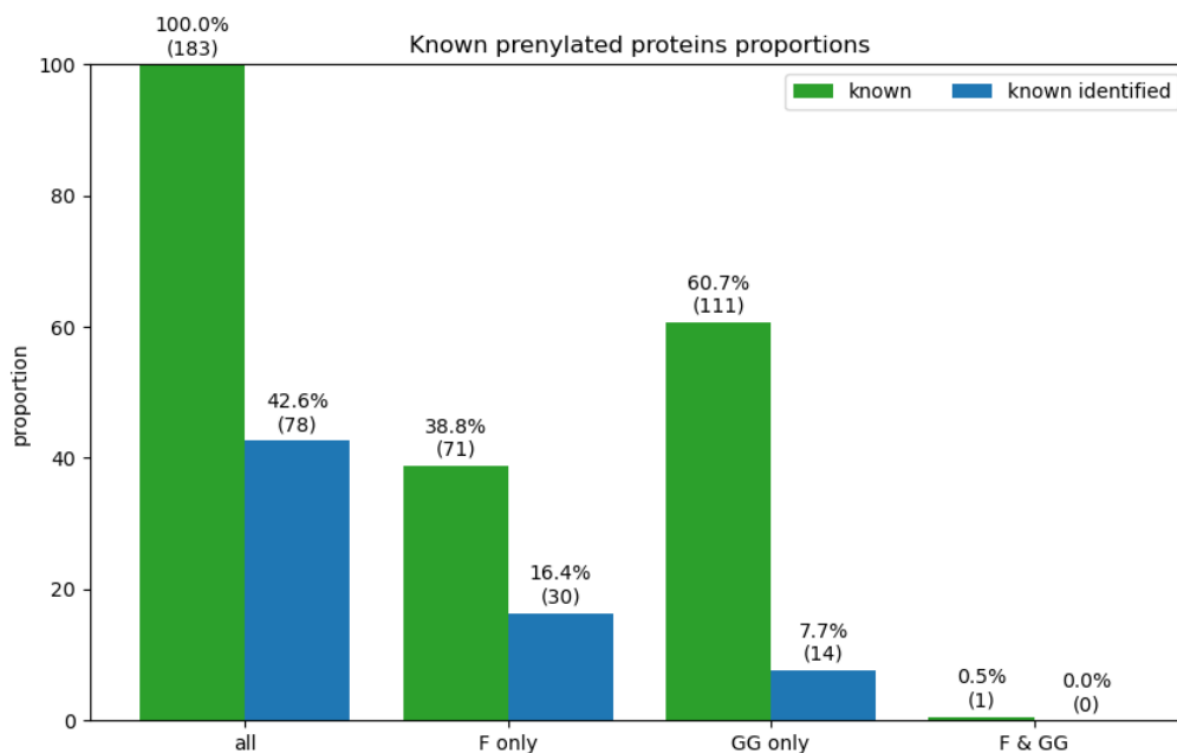

**Supplementary Figure S9:** Proportion of identified known prenylated (78 proteins, 42.6%), farnesylated (30), geranylgeranylated (14), and both geranylgeranylated and farnesylated proteins (0) compared to all annotated prenylated (183), farnesylated (71), geranylgeranylated (111), and both geranylgeranylated and farnesylated proteins (1) in UniProt.



### All known and identified prenylated proteins

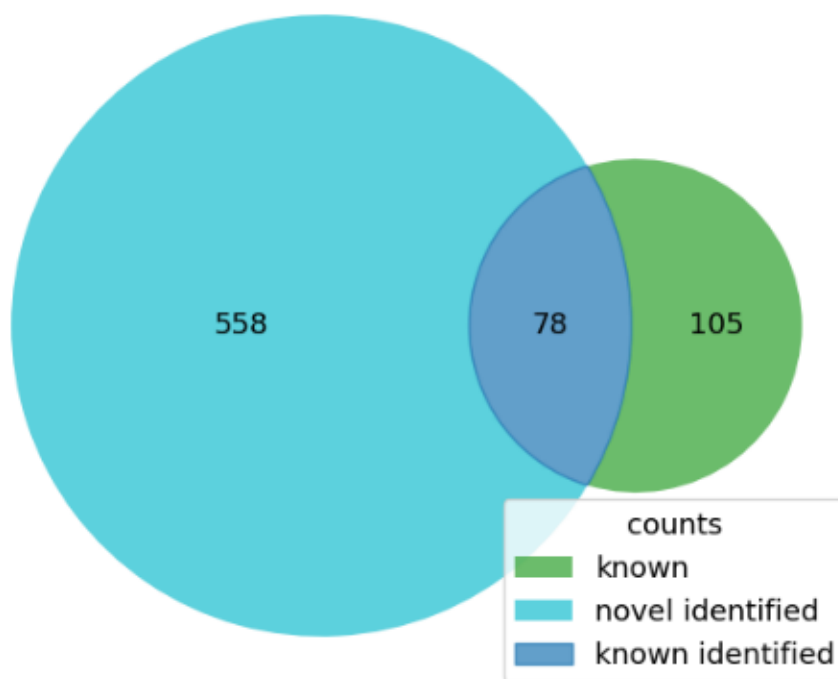

**Supplementary Figure S10:** Of all the 636 identified prenylated proteins, 78 (12.3%) are annotated as prenylated in UniProt, whereas 558 are novel that have not previously been known to be prenylated.

### Novel identified prenylated proteins

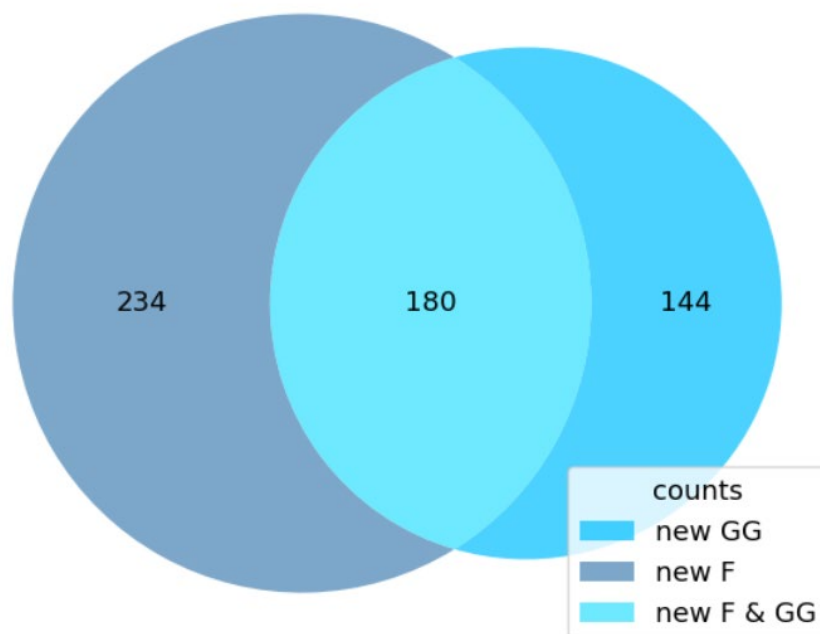

**Supplementary Figure S11:** Venn diagram with the number of newly identified prenylated proteins in cells treated with GG-Az, F-Az, or both.

## Sequence Logos: Known prenylated proteins from UniProt

F known CAAX (25)

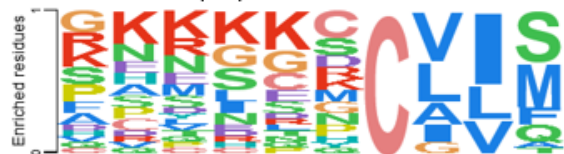

GG known CAAX (27)

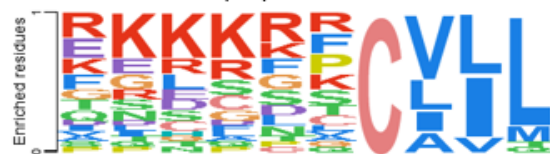

F known CXXX (46)

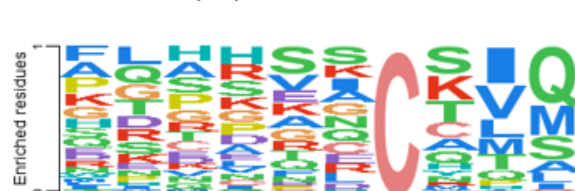

GG known CXXX (44)

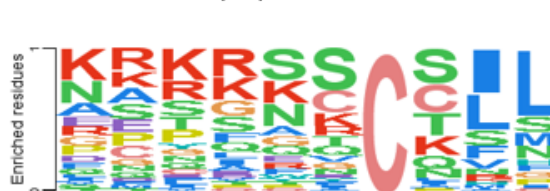

GG known CXC (20)

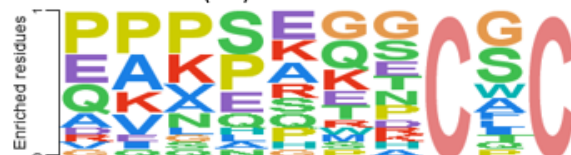

GG known CCX (4)

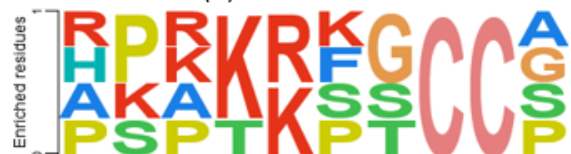

GG known CC (16)

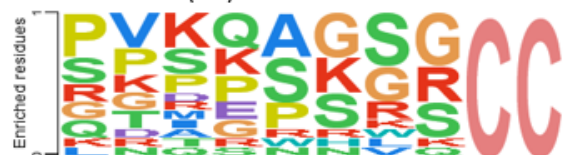

GG known C (1)

FEESGNRSYC

**Supplementary Figure S12:** Sequence logos of the 10 most C-terminal amino acids of the proteins known to be farnesylated (F) or geranylgeranylated (GG), separated by the different canonical prenylation motifs.

## KNOWN identified prenylated proteins with canonical motif

F identified CAAX (12)

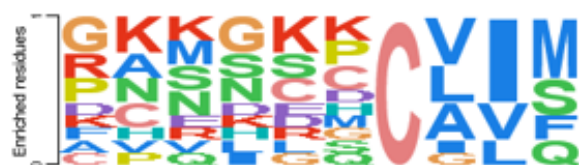

GG identified CAAX (13)

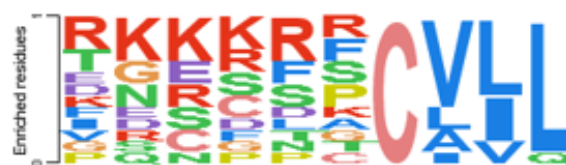

F identified CXXX (22)

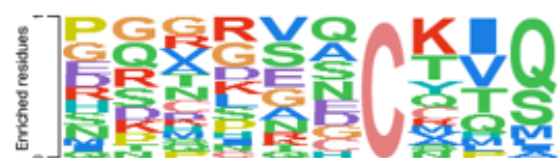

GG identified CXXX (16)

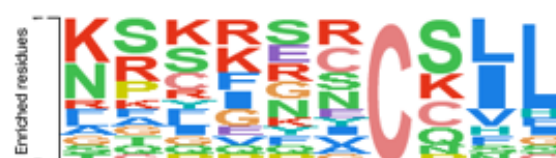

GG identified CXC (10)

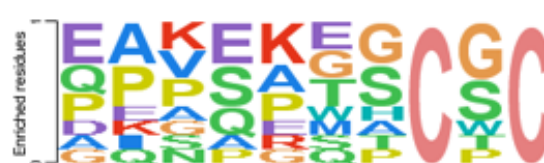

GG identified CC (5)

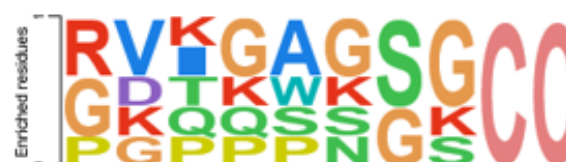

**Supplementary Figure S13:** Sequence logos of the 10 most C-terminal amino acids of the proteins known to be prenylated and identified here as significantly enriched in samples treated with F-Az (F) or GG-Az (GG), separated by the different canonical prenylation motifs.

## NEW identified prenylated proteins with canonical motif

F identified CAAX (5)

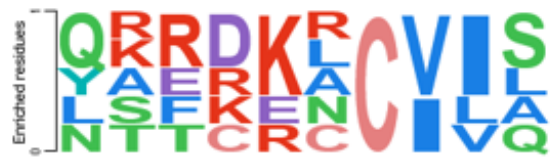

F identified CXXX (15)

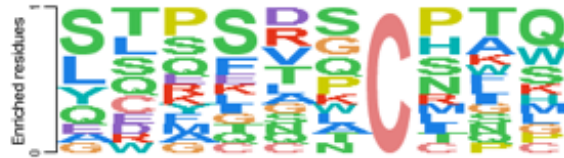

GG identified CXXX (6)

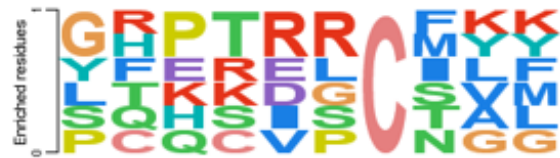

F identified CXC (3)

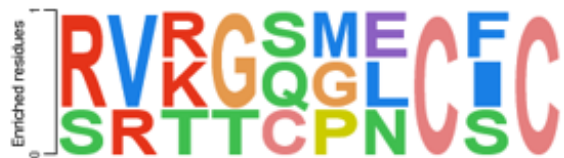

F identified C (12)

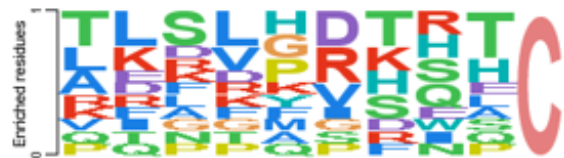

GG identified C (4)

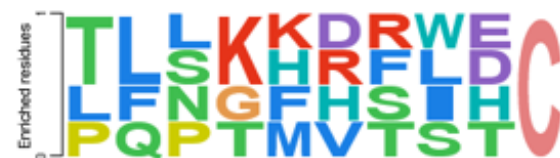

**Supplementary Figure S14:** Sequence logos of the 10 most C-terminal amino acids of the proteins not previously known to be prenylated and identified here as significantly enriched in samples treated with F-Az (F) or GG-Az (GG), separated by the different canonical prenylation motifs.

A)

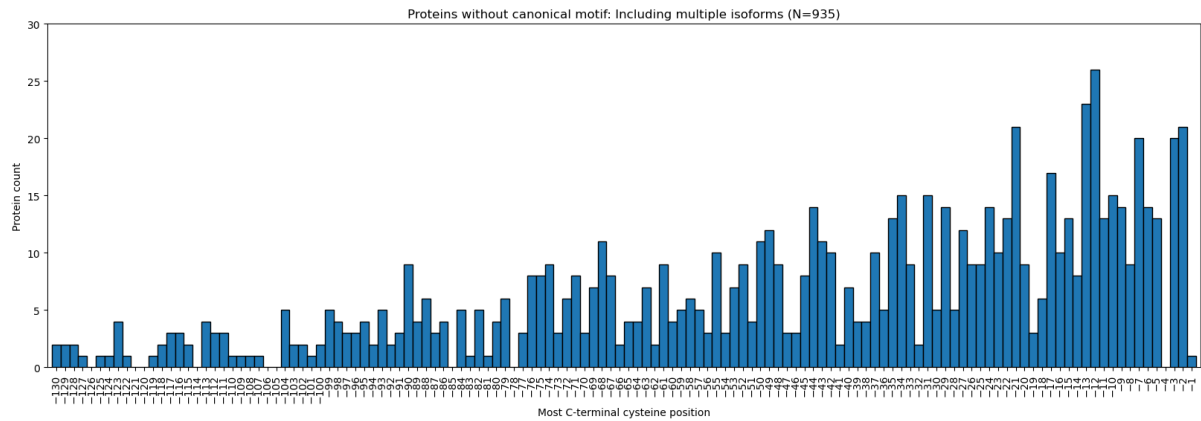

B)

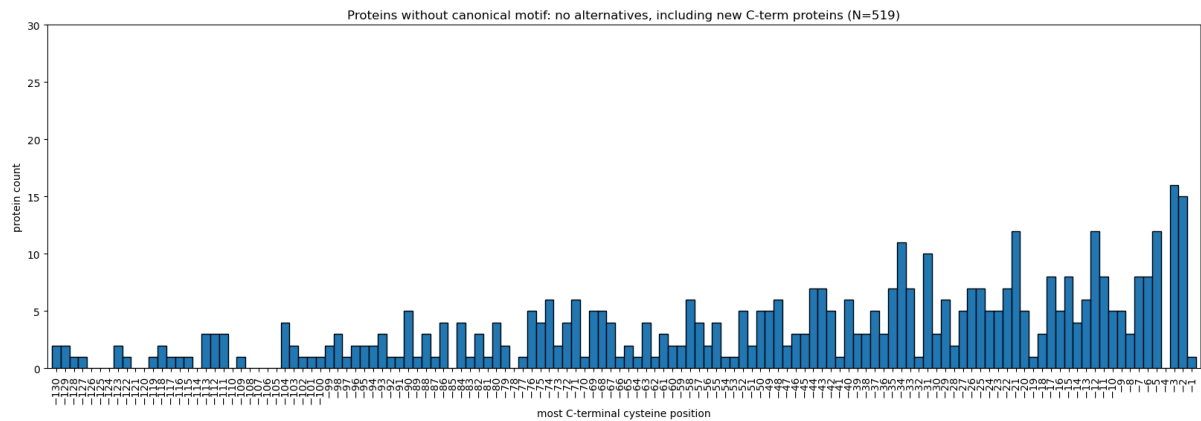

**Supplementary Figure S15:** A) Histogram of the most C-terminal cysteine positions of all the 935 distinct isoforms of the 519 proteins, which did not contain any canonical prenylation motif in any of their isoforms. B) Histogram of the most C-terminal cysteine positions in 519 proteins without a canonical C-terminal prenylation motif, considering only the canonical isoform or, if it did not contain a cysteine, the isoform with the highest number of cysteines. These consist of 44 proteins with a newly identified C-terminal prenylation motif, 241 proteins with an internal prenylation motif and no alternative isoform, and 234 proteins with an internal prenylation motif and multiple isoforms,

**A) pren\_all\_C1 (N=194)**

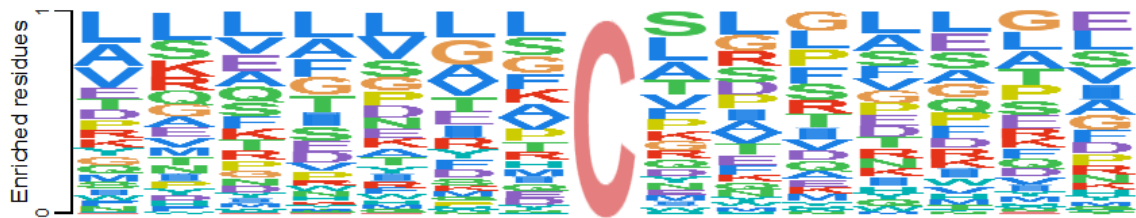

**B) back\_all\_C1 (N=296)**

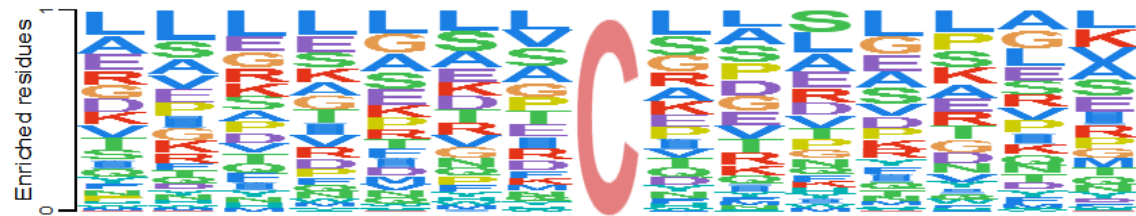

**Supplementary Figure S16:** A) Sequence logo showing the distribution of the 15 amino acids with the potentially prenylated cysteine in the central position for the 195 internally prenylated proteins for which the potentially prenylated cysteine was neither within the first seven N-terminal amino acids of the protein nor part of a CC, CXC, or CCC motif. B) Same as in A, but for the background proteins that were not identified as prenylated.

A) Farnesylated: 70

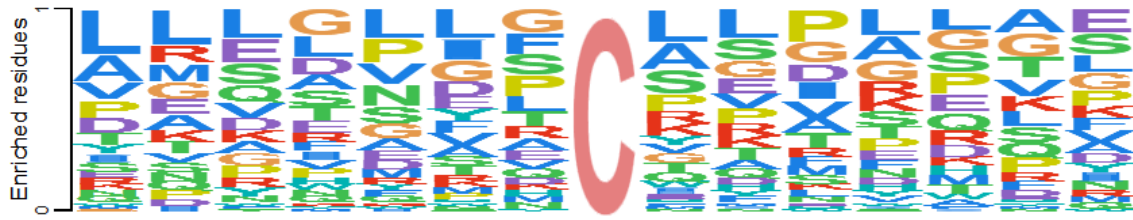

B) Geranylgeranylated: 52

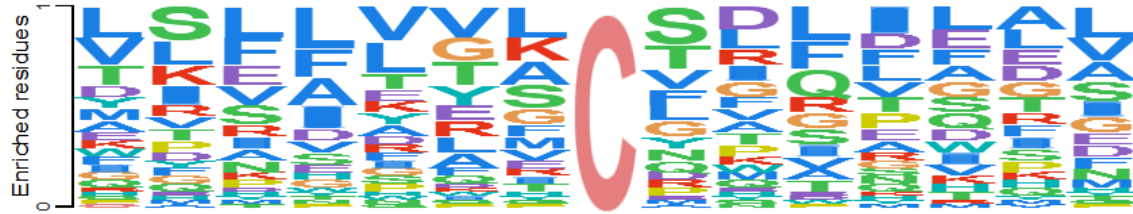

C) Farnesylated & Geranylgeranylated: 73

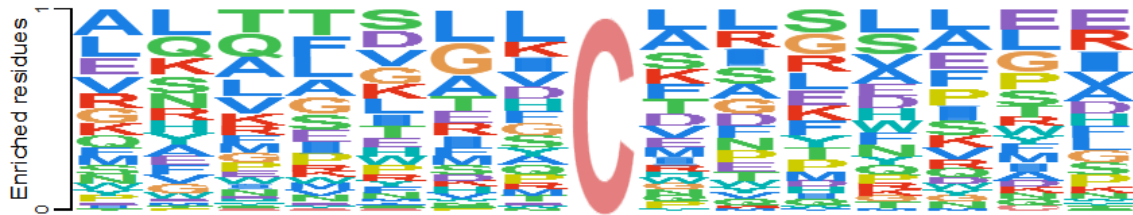

**Supplementary Figure S17:** Sequence logo showing the distribution of the 15 amino acids with the potentially prenylated cysteine in the central position for the 195 internally prenylated proteins for which the potentially prenylated cysteine was neither within the first seven N-terminal amino acids of the protein nor part of a CC, CXC, or CCC motif, for the prenylated proteins identified A) only in samples treated with F-Az, B) only in samples treated with GG-Az, and C) both in samples treated F-Az or GG-Az.



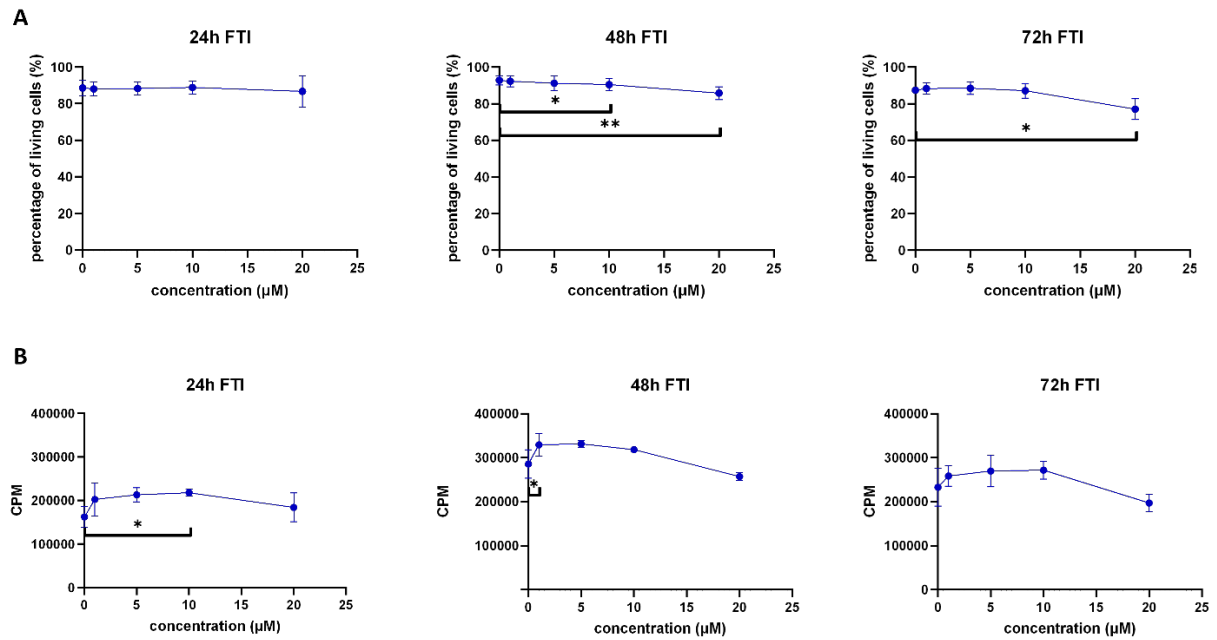

**Supplementary Figure S18:** Optimal concentrations of the farnesyl transferase inhibitor FTI-277 were assessed over 1–3 days using inhibition of proliferation with minimal cell death as the readout using *in vitro*-differentiated Th1 cells. Analysis of A) cell proliferation with the H3-thymidine incorporation assay and of B) cell viability with the live dead staining using propidium iodide in cells treated with FTI-277 at the indicated concentrations for 24, 48, and 72 hours. For each concentration, samples from each donor were measured in three technical replicates, and the mean of three donors  $\pm$  standard deviation is shown (\*\* = p-value < 0.01, \* = p-value < 0.05); CPM: counts per minute.

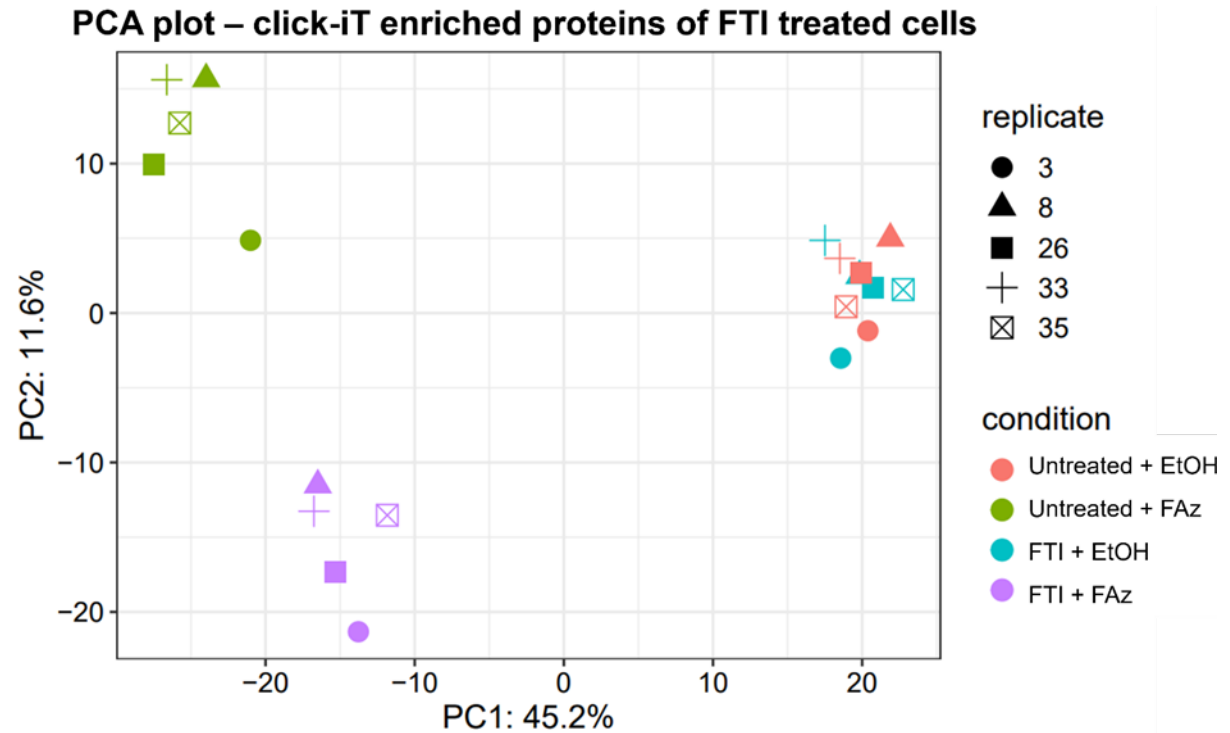

**Supplementary Figure S19:** Principal Component Analysis (PCA) of prenylation enrichment samples from five different donors, showing PC1 and PC2. In vitro-differentiated Th1 cells were either pre-treated or not with 20  $\mu$ M farnesyl transferase inhibitor (FTI-277) for 1 hour, followed by incubation with F-Az or ethanol (mock treatment) for an additional 23 hours.

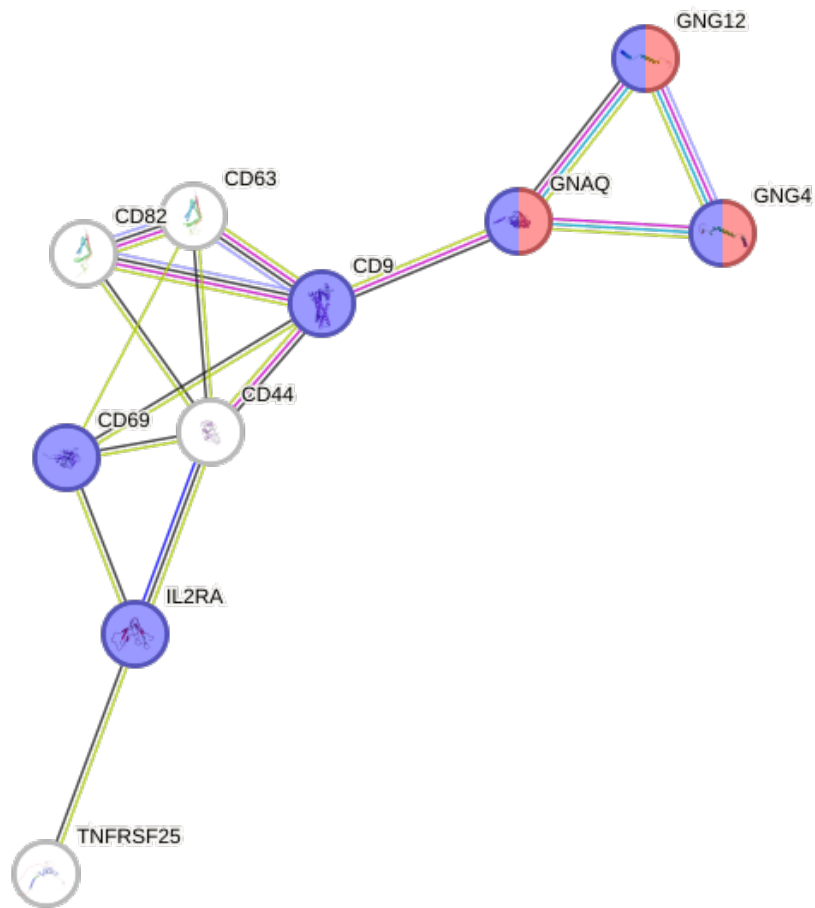

**Supplementary Figure S20:** Cluster 3 from the STRING analysis of the proteins showing increased prenylation in activated Th1 cells compared to non-activated Th1 cells. Proteins annotated to the GO Cellular Component terms “Heterotrimeric G-protein complex” and “Side of membrane” are shown in red and purple, respectively.

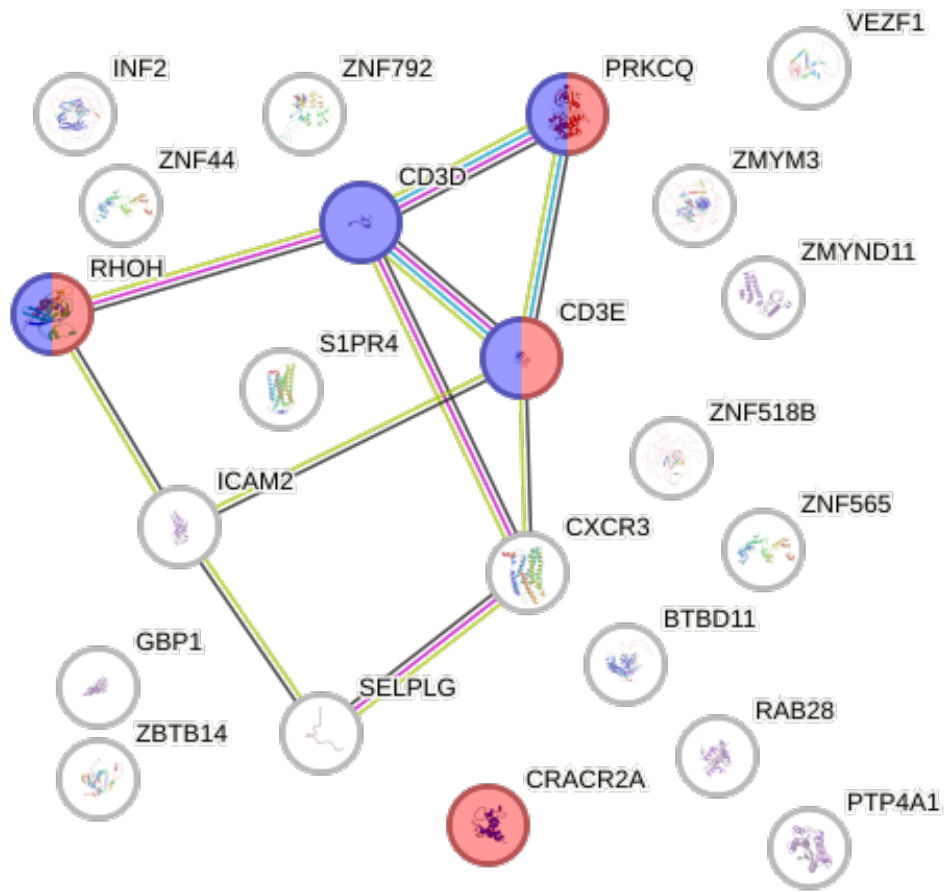

**Supplementary Figure S21:** STRING network analysis of the 22 proteins with increased prenylation in non-activated Th1 cells compared to activated Th1 cells. Proteins annotated with the overrepresented GO Biological Process term "Immunological synapse" are shown in red, and those associated with the WikiPathway "Modulators of TCR signalling and T cell activation" in purple.

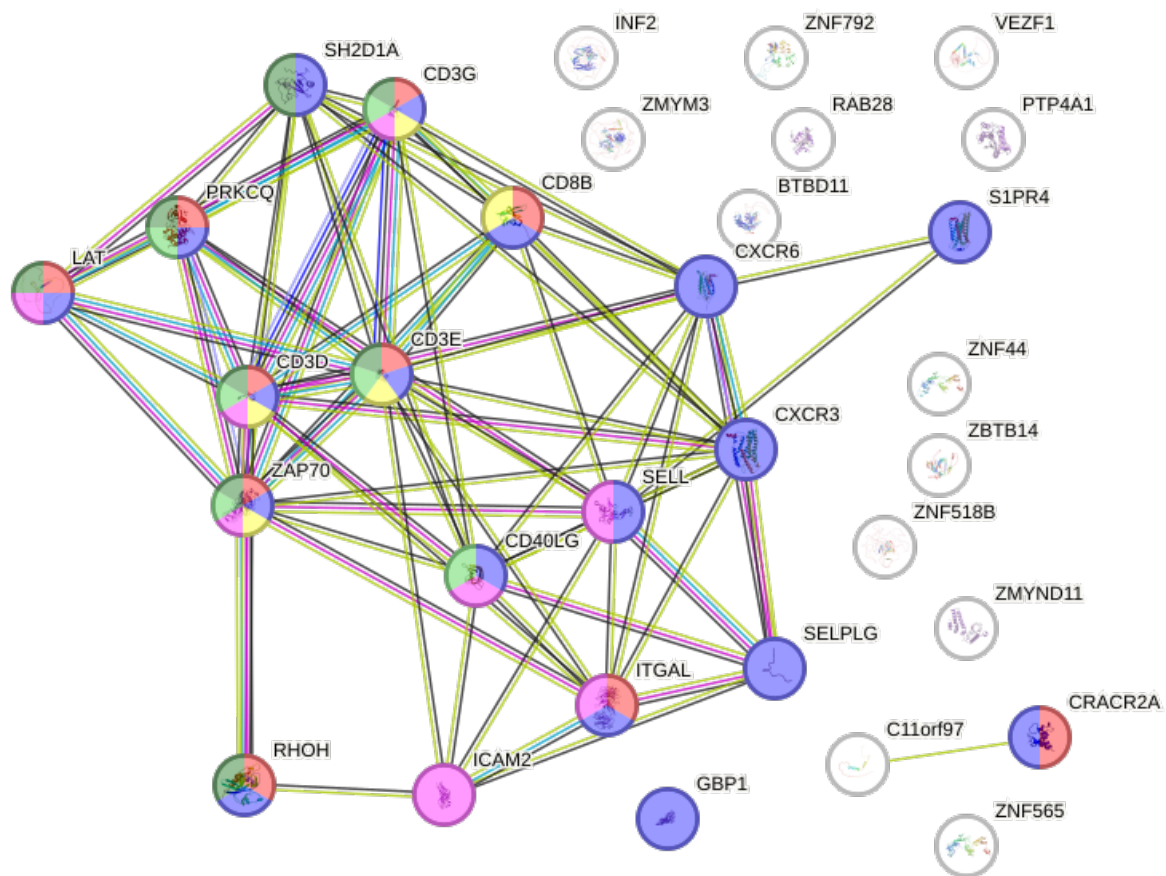

**Supplementary Figure S22:** STRING network analysis of the 22 proteins with increased prenylation in non-activated Th1 cells compared to activated Th1 cells plus 10 interactors. Proteins annotated with the overrepresented GO Biological Process terms “T cell activation” and “Immune system process” are shown in red and purple, respectively, those associated with the GO Cellular Component term “T cell receptor complex” in yellow, those in the WikiPathway “Modulators of TCR signalling and T cell activation” in dark green, and those in the KEGG Pathway “T cell receptor signalling pathway” in light green.





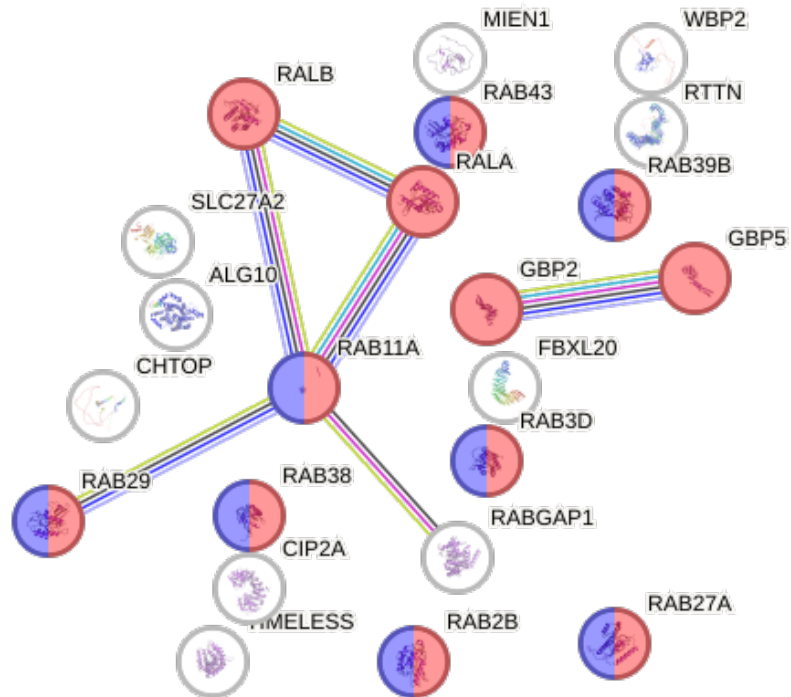

**Supplementary Figure S25:** STRING network analysis of the 22 significantly enriched proteins in non-statin-pretreated, GG-Az-treated samples. Proteins annotated with the most overrepresented GO Molecular Function term “GTPase activity” are shown in red, and those associated with the most Reactome Pathway “RAB geranylation” in purple.
