# Supplementary material for: Uncovering Protein Prenylation in Th1 Cells: Novel Prenylation Sites and Insights into Statin and Farnesyltransferase Inhibition
Source: Research Square preprint supplement (doi:10.21203/rs.3.rs-6305485/v1), 2025-04-01
Supplement: Supplementary file 1 [file 4ea897e96ec841676c4b4e2a.xlsx]

## Sheet: Sheet1
Supplementary Table S8. Differentially prenylated proteins comparing activated and non-activated Th1 cells treated with (1) F-Az and (2) GG-Az. The adjusted p-value (adj_pval) and log₂-transformed fold change (log2_fc) are provided, along with the average log-fold change (Average FC). Additional information includes results from different background filtering approaches and whether the protein is…
Protein Name	Protein ID	Background Significant Cntr_Act vs Cntr_non-act	Background Significant FAz_GGAz vs Cntr	Background Significant TE	Known prenylated	Average FC	FAz_Act vs FAz_non-act p.adj	FAz_Act vs FAz_non-act log_fc	FAz_Act vs FAz_non-act significant	GGAz_Act vs GGAz_non-act p.adj	GGAz_Act vs GGAz_non-act log_fc	GGAz_Act vs GGAz_non-act significant
GNG4	P50150	0	0	0	GNG4	5.38				0.00689	5.38	TRUE
NDFIP2	Q9NV92	0	0	0		5.01				1.14e-13	5.01	TRUE
KDM6B	O15054	0	0	0		4.95	6.28e-14	4.95	TRUE
CD9	P21926	0	0	0		4.12				0.000579	4.12	TRUE
CD69	Q07108	0	0	0		4.065	6.28e-14	3.45	TRUE	1.48e-09	4.68	TRUE
RAD21L1	Q9H4I0	0	0	0		3.67	0.003	3.67	TRUE
ZNF697	Q5TEC3	0	0	0		3.415	0.011	3.73	TRUE	0.0487	3.1	TRUE
TNFRSF25	Q93038	0	0	0		3.01				0.000156	3.01	TRUE
RBM19	Q9Y4C8	0	0	0		2.72				1.14e-13	2.72	TRUE
VDR	P11473	0	0	0		2.545	0.0339	2.17	TRUE	3.21e-10	2.92	TRUE
GNG12	Q9UBI6	0	0	0	GNG12	2.5	3.19e-09	2.5	TRUE
NDFIP1	Q9BT67	0	0	0		2.27				0.00441	2.27	TRUE
NCOA2	Q15596	0	0	0		2.1				1.1e-07	2.1	TRUE
CD82	P27701	0	0	0		2.035	6.28e-14	2.4	TRUE	2.35e-09	1.67	TRUE
FNDC3B	Q53EP0	0	0	0		2.03	2.36e-11	2.03	TRUE
PVR	P15151	0	0	0		2.01	0.00105	2.01	TRUE
SLC39A14	Q15043	0	0	0		1.935	0.00665	1.81	TRUE	0.00703	2.06	TRUE
TRPS1	Q9UHF7	0	0	0		1.83	0.00312	1.83	TRUE
CD63	P08962	0	0	0		1.67	0.0114	1.67	TRUE
ARID5A	Q03989	0	0	0		1.61				0.00595	1.61	TRUE
GNAQ	P50148	0	0	0		1.49				8.35e-05	1.49	TRUE
DPAGT1	Q9H3H5	0	0	0		1.48	6.28e-14	1.48	TRUE
PNO1	Q9NRX1	0	0	0		1.46				0.00803	1.46	TRUE
SYNGAP1	Q96PV0	0	0	0		1.41				0.000209	1.41	TRUE
TYSND1	Q2T9J0	0	0	0		1.39	0.0064	1.39	TRUE
SLC38A1	Q9H2H9	0	0	0		1.36	3.83e-05	1.36	TRUE
IL2RA	P01589	0	0	0		1.33				0.0391	1.33	TRUE
CD44	P16070	0	0	0		1.28	0.0068	1.11	TRUE	9.84e-11	1.45	TRUE
NAF1	Q96HR8	0	0	0		1.23				2.57e-05	1.23	TRUE
CYP51A1	Q16850	0	0	0		1.21	0.0243	1.21	TRUE
NSDHL	Q15738	0	0	0		1.09	0.00179	1.09	TRUE
GFI1	Q99684	0	0	0		1.08	0.0135	1.08	TRUE
ZNF267	Q14586	0	0	0		1.08				0.0247	1.08	TRUE
FAM60A	Q9NP50	0	0	0		1.04	0.00215	1.04	TRUE
BZW2	Q9Y6E2	0	0	0		0.923				0.0228	0.923	TRUE
BMS1	Q14692	0	0	0		0.868	0.0483	0.868	TRUE
RFTN1	Q14699	0	0	0		0.859	0.0149	0.859	TRUE
ATN1	P54259	0	0	0		0.843				0.0488	0.843	TRUE
ZNF16	P17020	0	0	0		0.833				0.00378	0.833	TRUE
SRA1	Q9HD15	0	0	0		0.769	0.00752	0.769	TRUE
VASP	P50552	0	0	0		0.683	0.00707	0.683	TRUE
ZMYND11	Q15326	0	0	0		-0.611				0.0449	-0.611	TRUE
VEZF1	Q14119	0	0	0		-0.626				0.0494	-0.626	TRUE
ZMYM3	Q14202	0	0	0		-0.667	0.0106	-0.667	TRUE
ZNF44	P15621	0	0	0		-0.724				0.0443	-0.724	TRUE
ZBTB14	O43829	0	0	0		-0.745	0.0167	-0.745	TRUE
BTBD11	A6QL63	0	0	0		-0.785	0.0363	-0.785	TRUE
ZNF792	Q3KQV3	0	0	0		-0.88	0.00744	-0.88	TRUE
PRKCQ	Q04759	0	0	0		-0.935	0.00213	-0.935	TRUE
CD3D	P04234	0	0	0		-0.94				0.00112	-0.94	TRUE
CD3E	P07766	0	0	0		-1				0.0413	-1	TRUE
ZNF565	Q8N9K5	0	0	0		-1.05	3.52e-06	-1.05	TRUE
GBP1	P32455	0	0	0	GBP1	-1.39	0.0334	-1.39	TRUE
CRACR2A	Q9BSW2	0	0	0	CRACR2A	-1.54				0.016	-1.54	TRUE
RAB28	P51157	0	0	0	RAB28	-1.63	0.00493	-1.63	TRUE
SELPLG	Q14242	0	0	0		-1.84				1.45e-08	-1.84	TRUE
S1PR4	O95977	0	0	0		-2.04	0.00119	-1.93	TRUE	0.00758	-2.15	TRUE
PTP4A1	Q93096	0	0	0	PTP4A1	-2.24	6.55e-05	-2.24	TRUE
ZNF518B	Q9C0D4	0	0	0		-2.35	0.00241	-2.35	TRUE
RHOH	Q15669	0	0	0	RHOH	-2.4	0.00408	-2.4	TRUE
CXCR3	P49682	0	0	0		-2.45				0.0198	-2.45	TRUE
ICAM2	P13598	0	0	0		-2.5				1.14e-13	-2.5	TRUE
INF2	Q27J81	0	0	0		-2.85	0.0368	-2.85	TRUE
IFNG	P01579	0	0	1		3.035	1.65e-05	2.98	TRUE	2.82e-05	3.09	TRUE
FAM195A	Q9BUT9	0	0	1		2.82	6.28e-14	2.82	TRUE
JUND	P17535	0	0	1		2.76	0.00676	2.76	TRUE
BCL2L1	Q07817	0	0	1		2.69	1.68e-11	2.69	TRUE
MAP1LC3B2	A6NCE7	0	0	1		2.28	0.000316	2.28	TRUE
TRIP10	Q15642	0	0	1		1.6				0.00844	1.6	TRUE
PUS7	Q96PZ0	0	0	1		1.54				1.14e-13	1.54	TRUE
SLC1A5	Q15758	0	0	1		1.41	0.0138	1.41	TRUE
ADO	Q96SZ5	0	0	1		1.37	1.41e-08	1.37	TRUE
ZFAND5	O76080	0	0	1		1.19				0.00492	1.19	TRUE
AGFG2	O95081	0	0	1		1.09	0.0257	1.09	TRUE
HK2	P52789	0	0	1		1.09				0.0169	1.09	TRUE
SH2D2A	Q9NP31	0	0	1		1.06				0.00417	1.06	TRUE
SATB1	Q01826	0	0	1		1.02	0.0375	1.02	TRUE
TNFAIP8	O95379	0	0	1		0.9145	0.00234	0.799	TRUE	0.000656	1.03	TRUE
GPATCH4	Q5T3I0	0	0	1		0.904				0.00925	0.904	TRUE
RRP1	P56182	0	0	1		0.8565	0.000311	0.925	TRUE	0.00948	0.788	TRUE
BZW1	Q7L1Q6	0	0	1		0.812	0.0471	0.812	TRUE
CCDC6	Q16204	0	0	1		0.754	0.0177	0.754	TRUE
TNIP1	Q15025	0	0	1		-0.627				0.013	-0.627	TRUE
NDUFS6	O75380	0	0	1		-0.664	0.0423	-0.664	TRUE
ARHGAP30	Q7Z6I6	0	0	1		-0.726	0.00462	-0.65	TRUE	0.00729	-0.802	TRUE
KEAP1	Q14145	0	0	1		-0.756	0.0146	-0.756	TRUE
GLRX	P35754	0	0	1		-0.812	0.00461	-0.812	TRUE
INPP4A	Q96PE3	0	0	1		-0.913	0.0494	-0.913	TRUE
AHNAK	Q09666	0	0	1		-0.976	0.00125	-0.976	TRUE
OPTN	Q96CV9	0	0	1		-0.978				0.0234	-0.978	TRUE
ADD1	P35611	0	0	1		-1.02				0.0349	-1.02	TRUE
BCL11B	Q9C0K0	0	0	1		-1.045	0.00184	-0.91	TRUE	0.00224	-1.18	TRUE
CD247	P20963	0	0	1		-1.09				0.00814	-1.09	TRUE
TRIM41	Q8WV44	0	0	1		-1.17				0.00453	-1.17	TRUE
MAN2B1	O00754	0	0	1		-1.2				0.000182	-1.2	TRUE
ADD3	Q9UEY8	0	0	1		-1.22				0.0164	-1.22	TRUE
CTSD	P07339	0	0	1		-1.53				0.0269	-1.53	TRUE
APOL3	O95236	0	0	1		-1.54	0.0412	-1.54	TRUE
ABLIM1	O14639	0	0	1		-1.62	0.0109	-1.62	TRUE
BIN2	Q9UBW5	0	0	1		-1.73	0.000997	-1.73	TRUE
TIMP1	P01033	0	0	1		-1.85	0.0417	-1.85	TRUE
RASGRP2	Q7LDG7	0	0	1		-1.89	0.000625	-1.24	TRUE	2.29e-08	-2.54	TRUE
LGALS3BP	Q08380	0	0	1		-1.9				0.00586	-1.9	TRUE
ARSA	P15289	0	0	1		-2.115	1.52e-06	-1.7	TRUE	0.0299	-2.53	TRUE
GZMA	P12544	0	0	1		-3.25				0.0021	-3.25	TRUE
ZEB2	O60315	1	0	0		6.565	5.65e-05	6.43	TRUE	3.51e-12	6.7	TRUE
PHLDA1	Q8WV24	1	0	0		6.135	2.96e-05	5.57	TRUE	0.00527	6.7	TRUE
EGR3	Q06889	1	0	0		4.945	4.02e-07	4.95	TRUE	1.14e-13	4.94	TRUE
TNFRSF18	Q9Y5U5	1	0	0		4.245	1.44e-05	3.98	TRUE	4.43e-09	4.51	TRUE
NHS	Q6T4R5	1	0	0		3.47	0.0119	3.47	TRUE
SEMA7A	O75326	1	0	0		3.39	6.28e-14	3.39	TRUE
CCL3	P10147	1	0	0		3	0.00219	3	TRUE
NR4A2	P43354	1	0	0		2.415	6.28e-14	2.67	TRUE	1.87e-05	2.16	TRUE
RGCC	Q9H4X1	1	0	0		2.37	6.28e-14	2.37	TRUE
NR4A1	P22736	1	0	0		2.095	6.28e-14	2.14	TRUE	0.0331	2.05	TRUE
EGR1	P18146	1	0	0		2.065	1.79e-06	2.23	TRUE	1.14e-13	1.9	TRUE
PLAGL2	Q9UPG8	1	0	0		1.64	2.5e-07	1.69	TRUE	8.1e-13	1.59	TRUE
CTTN	Q14247	1	0	0		1.6	7.44e-07	1.6	TRUE
IGFLR1	Q9H665	1	0	0		1.48				7.06e-05	1.48	TRUE
TET2	Q6N021	1	0	0		1.32	0.0284	1.39	TRUE	1.6e-06	1.25	TRUE
OTUD7B	Q6GQQ9	1	0	0		0.9195	0.0215	0.987	TRUE	0.0423	0.852	TRUE
ZEB1	P37275	1	0	0		0.851				0.0227	0.851	TRUE
TAX1BP1	Q86VP1	1	0	0		0.755	0.00322	0.832	TRUE	0.00958	0.678	TRUE
CHD7	Q9P2D1	1	0	0		0.667	0.00427	0.667	TRUE
GLG1	Q92896	1	0	0		-0.681				0.00694	-0.681	TRUE
ZNF319	Q9P2F9	1	0	0		-0.871	0.0475	-0.871	TRUE
AAMDC	Q9H7C9	1	0	0		-0.894				0.0447	-0.894	TRUE
ANKRD10	Q9NXR5	1	0	0		-0.937	0.0109	-0.937	TRUE
PBXIP1	Q96AQ6	1	0	0		-1.135	0.000443	-1.11	TRUE	0.000387	-1.16	TRUE
HIVEP2	P31629	1	0	0		-1.325	2.5e-07	-1.37	TRUE	0.00231	-1.28	TRUE
GLI4	P10075	1	0	0		-1.5	8.51e-07	-1.61	TRUE	1.57e-08	-1.39	TRUE
ZNF652	Q9Y2D9	1	0	0		-1.75	0.00105	-1.7	TRUE	3.07e-07	-1.8	TRUE
ZNF836	Q6ZNA1	1	0	0		-2.1	7.81e-05	-2.1	TRUE
KLF3	P57682	1	0	0		-4.3	2.86e-06	-4.3	TRUE
KLF2	Q9Y5W3	1	0	0		-6.165	2.18e-08	-6.23	TRUE	0.000164	-6.1	TRUE
EGR2	P11161	1	0	1		8.515	6.28e-14	8.7	TRUE	1.14e-13	8.33	TRUE
NR4A3	Q92570	1	0	1		5.36	6.28e-14	5.44	TRUE	1.14e-13	5.28	TRUE
TNFRSF4	P43489	1	0	1		4.585	6.28e-14	4.86	TRUE	0.00357	4.31	TRUE
ZBED2	Q9BTP6	1	0	1		4.36	6.28e-14	4.02	TRUE	7.03e-10	4.7	TRUE
JUNB	P17275	1	0	1		4.305	0.000145	4.52	TRUE	1.62e-05	4.09	TRUE
LAG3	P18627	1	0	1		3.92	0.037	3.92	TRUE
REL	Q04864	1	0	1		3.565	6.28e-14	3.35	TRUE	9.93e-10	3.78	TRUE
ZFP36L1	Q07352	1	0	1		2.725	4.84e-07	2.75	TRUE	1.79e-05	2.7	TRUE
SGK223	Q86YV5	1	0	1		2.36	5.53e-07	2.36	TRUE
YBX3	P16989	1	0	1		2.34				0.00418	2.34	TRUE
FOSL2	P15408	1	0	1		2.28	0.0275	2.28	TRUE
IRF4	Q15306	1	0	1		2.035	0.000891	1.92	TRUE	2.31e-05	2.15	TRUE
NAMPT	P43490	1	0	1		1.825	2.03e-10	1.66	TRUE	3.98e-12	1.99	TRUE
SIAH2	O43255	1	0	1		1.74	0.00268	1.48	TRUE	5.34e-10	2	TRUE
HMGCS1	Q01581	1	0	1		1.695	3.29e-10	1.85	TRUE	0.00991	1.54	TRUE
SAMSN1	Q9NSI8	1	0	1		1.55	1.41e-09	1.55	TRUE
MTHFD2	P13995	1	0	1		1.18	0.0106	1.18	TRUE
NFATC1	O95644	1	0	1		1.09				0.00638	1.09	TRUE
IRF2BP2	Q7Z5L9	1	0	1		0.943	0.0197	0.846	TRUE	0.00342	1.04	TRUE
AGFG1	P52594	1	0	1		0.931	0.0111	0.842	TRUE	1.87e-05	1.02	TRUE
FABP5	Q01469	1	0	1		0.8715	0.00021	0.926	TRUE	0.0121	0.817	TRUE
HSPH1	Q92598	1	0	1		0.782	0.0014	0.782	TRUE
ARHGDIB	P52566	1	0	1		-0.632				0.0479	-0.632	TRUE
TES	Q9UGI8	1	0	1		-0.684	0.0251	-0.684	TRUE
STK10	O94804	1	0	1		-0.741	0.00474	-0.642	TRUE	0.00282	-0.84	TRUE
FLI1	Q01543	1	0	1		-0.7415	0.00648	-0.601	TRUE	0.004	-0.882	TRUE
HMHA1	Q92619	1	0	1		-0.77				0.00746	-0.77	TRUE
SLC9A3R1	O14745	1	0	1		-0.7735	0.00261	-0.722	TRUE	0.00666	-0.825	TRUE
RNF166	Q96A37	1	0	1		-0.7945	0.000343	-0.773	TRUE	0.00276	-0.816	TRUE
NFATC2	Q13469	1	0	1		-0.818	2.69e-05	-0.859	TRUE	0.0175	-0.777	TRUE
SUN2	Q9UH99	1	0	1		-0.903	0.0477	-0.746	TRUE	0.00188	-1.06	TRUE
SAMHD1	Q9Y3Z3	1	0	1		-0.9175	0.0235	-0.863	TRUE	0.0331	-0.972	TRUE
NOSIP	Q9Y314	1	0	1		-0.955	0.000468	-0.955	TRUE
TBC1D10C	Q8IV04	1	0	1		-1.0165	8.07e-05	-1.14	TRUE	0.00867	-0.893	TRUE
S100A10	P60903	1	0	1		-1.02				0.00681	-1.02	TRUE
CTSC	P53634	1	0	1		-1.19	3.9e-05	-1.08	TRUE	0.00405	-1.3	TRUE
KLF13	Q9Y2Y9	1	0	1		-1.21	2.1e-06	-1.16	TRUE	0.00283	-1.26	TRUE
PXN	P49023	1	0	1		-1.3	1.37e-06	-1.25	TRUE	1.26e-06	-1.35	TRUE
LIMD2	Q9BT23	1	0	1		-1.375	0.0208	-1.32	TRUE	0.00592	-1.43	TRUE
GGH	Q92820	1	0	1		-1.455	0.00319	-1.19	TRUE	1.9e-06	-1.72	TRUE
CTSS	P25774	1	0	1		-1.49	6.7e-06	-1.4	TRUE	4.11e-05	-1.58	TRUE
PARP14	Q460N5	1	0	1		-1.52				0.0338	-1.52	TRUE
ITGB7	P26010	1	0	1		-2.21	4.98e-06	-2.09	TRUE	2.81e-08	-2.33	TRUE
SELL	P14151	1	0	1		-2.72	3.24e-06	-2.76	TRUE	1.5e-07	-2.68	TRUE
