# Supplementary material for: Uncovering Protein Prenylation in Th1 Cells: Novel Prenylation Sites and Insights into Statin and Farnesyltransferase Inhibition
Source: Research Square preprint supplement (doi:10.21203/rs.3.rs-6305485/v1), 2025-04-01
Supplement: Supplementary file 2 [file 7d841bf4210fcc8728b8a91d.xlsx]

## Sheet: Sheet1
Supplementary Table S10. Differentially prenylated proteins comparing activated Th1 cells pretreated or not with statin, and subsequently treated with (1) F-Az and (2) GG-Az. The adjusted p-value (adj_pval) and log₂-transformed fold change (log2_fc) are provided. Additional information includes results from background filtering for significant enrichment in Th1 cells pretreated or not with statin…
Protein Name	Protein ID	Known prenylated	FAz_Statin vs FAz_non-stat p.adj	FAz_Statin vs FAz_non-stat log_fc	Background Significant Cntr_Stat vs Cntr_non-stat	FAz_Statin vs FAz_non-stat significant	GGAz_Statin vs GGAz_non-stat p.adj	GGAz_Statin vs GGAz_non-stat log_fc	Background Significant Cntr_Stat vs Cntr_non-stat	GGAz_Statin vs GGAz_non-stat significant
RHOB	P62745	RHOB	6.17e-14	5.38	1	TRUE	4.37e-13	4.35	1	TRUE
RHOA	P61586	RHOA	6.17e-14	2.93	1	TRUE
RAB5B	P61020	RAB5B	2.52e-06	2.2	1	TRUE
RAB1B	Q9H0U4	RAB1B	6.72e-08	2.02	1	TRUE
RALA	P11233	RALA	1.69e-11	1.87	1	TRUE	0.000515	-1.61	0	TRUE
RAB5A	P20339	RAB5A	5.73e-06	1.64	1	TRUE
KLF2	Q9Y5W3		0.0134	1.36	1	TRUE
MIEN1	Q9BRT3	MIEN1	8.47e-06	1.32	1	TRUE	0.00049	-2.62	0	TRUE
PSAP	P07602		0.0016	1.16	1	TRUE	3.4e-05	1.3	1	TRUE
RAB11B	Q15907	RB11B	0.000441	1.09	1	TRUE
RAB21	Q9UL25	RAB21	0.000555	1.02	1	TRUE
GNG10	P50151	GBG10	0.00719	4.2		TRUE
CDC42	P60953	CDC42	6.17e-14	4		TRUE	0.0416	1.35		TRUE
CNP	P09543	CN37	6.17e-14	3.96		TRUE
UBL3	O95164	UBL3	1.11e-06	3.48		TRUE
GNG5	P63218	GBG5	6.17e-14	3.34		TRUE
GNG8	Q9UK08	GBG8	0.0011	3.23		TRUE
RAP2B	P61225	RAP2B	0.00182	3.22		TRUE
RAB18	Q9NP72	RAB18	6.17e-14	2.78		TRUE
RAC1	P63000	RAC1	6.17e-14	2.38		TRUE
GNG2	P59768	GBG2	2.23e-08	2.34		TRUE
RAB10	P61026	RAB10	9.02e-12	2.25		TRUE
KRAS	P01116	RASK	1.37e-06	2.2		TRUE
RRAS2	P62070	RRAS2	3.67e-08	2.16		TRUE
GNGT2	O14610	GBGT2	0.000914	2.15		TRUE
RHOC	P08134	RHOC	6.17e-14	2.12		TRUE
PHKB	Q93100	KPBB	6.17e-06	2.1		TRUE
PTP4A1	Q93096	TP4A1	0.0404	2.01		TRUE
RHOG	P84095	RHOG	6.17e-14	1.9		TRUE
RHEB	Q15382	RHEB	1.91e-11	1.85		TRUE
RAC2	P15153	RAC2	6.17e-14	1.84		TRUE
RAB5C	P51148	RAB5C	1.71e-08	1.82		TRUE
PTP4A2	Q12974	TP4A2	5.12e-06	1.79		TRUE
LMNB2	Q03252	LMNB2	0.00136	1.78		TRUE
RAB14	P61106	RAB14	6.17e-14	1.77		TRUE
RAB1A	P62820	RAB1A	4.72e-06	1.77		TRUE
RAB2A	P61019	RAB2A	3.19e-08	1.77		TRUE
MINA	Q8IUF8		4.03e-05	1.71		TRUE
RAB28	P51157	RAB28	6.17e-14	1.69		TRUE
YKT6	O15498	YKT6	2.35e-08	1.67		TRUE
DNAJA2	O60884	DNJA2	5.42e-05	1.63		TRUE
NAP1L1	P55209	NP1L1	0.000214	1.6		TRUE
RAB6A	P20340	RAB6A	6.17e-14	1.59		TRUE
ULK3	Q6PHR2	ULK3	0.00113	1.59		TRUE
RAP2A	P10114	RAP2A	1.28e-06	1.56		TRUE
EHBP1	Q8NDI1		0.0224	1.51		TRUE
RAP1B	P61224	RAP1B	1.59e-08	1.49		TRUE
BROX	Q5VW32	BROX	6.38e-07	1.48		TRUE
RALB	P11234	RALB	1.15e-13	1.47		TRUE	8.74e-13	-2.57		TRUE
DNAJA1	P31689	DNJA1	0.000184	1.47		TRUE
RAP2C	Q9Y3L5	RAP2C	9.9e-10	1.47		TRUE
EHBP1L1	Q8N3D4		0.0149	1.41		TRUE
FAM219A	Q8IW50		3.39e-06	1.41		TRUE
PEX19	P40855	PEX19	1.41e-06	1.34		TRUE
PPP1R16B	Q96T49	PP16B	0.00642	1.31		TRUE
RAB8A	P61006	RAB8A	2.14e-13	1.31		TRUE
RAP1A	P62834	RAP1A	7.16e-05	1.31		TRUE
LMNB1	P20700	LMNB1	0.00585	1.3		TRUE
NRAS	P01111	RASN	6.25e-05	1.3		TRUE
DCAF8	Q5TAQ9	DCAF8	0.00928	1.2		TRUE
NAP1L4	Q99733	NP1L4	0.00512	1.2		TRUE
CENPE	Q02224	CENPE	0.00673	1.19		TRUE
GBP2	P32456	GBP2	1.59e-11	1.15		TRUE	2.71e-05	-1.43		TRUE
WDTC1	Q8N5D0		0.00147	1.11		TRUE
DPCD	Q9BVM2	DPCD	0.0265	1.04		TRUE
CLDND1	Q9NY35		0.0312	0.913		TRUE
FGF18	O76093		0.00481	0.888		TRUE
SLC25A12	O75746		0.0498	0.856		TRUE
NDUFS6	O75380		0.00521	0.834		TRUE
RHOH	Q15669	RHOH	0.00193	0.822		TRUE
RAB7A	P51149	RAB7A	0.00172	0.79		TRUE
ZC3HAV1	Q7Z2W4		0.0205	0.779		TRUE
SPTLC1	O15269		0.00464	0.771		TRUE
GGH	Q92820		0.041	0.73		TRUE	0.0317	0.894		TRUE
ATP5C1	P36542		0.0218	0.689		TRUE
B2M	P61769		0.00158	0.658		TRUE
GNB1	P62873		0.0125	0.634		TRUE
GK	P32189		0.01	0.603		TRUE
RPIA	P49247		0.0466	-0.594		TRUE
KMT2E	Q8IZD2		0.0466	-0.667		TRUE
ASF1A	Q9Y294		0.0412	-0.737		TRUE
GEMIN8	Q9NWZ8		0.0432	-0.925		TRUE
HNF1B	P35680		1.9e-06	-2.05		TRUE
DNAJC2	Q99543		0.00367	-2.11		TRUE
GIMAP2	Q9UG22		0.00795	-4.36		TRUE
CD97	P48960						0.00352	0.837	1	TRUE
ITM2A	O43736						0.0164	2.71		TRUE
DLG3	Q92796						0.00159	2.13		TRUE
KLF13	Q9Y2Y9						0.0439	0.952		TRUE
TRPV2	Q9Y5S1						0.00697	0.754		TRUE
TXNDC12	O95881						0.0126	0.709		TRUE
DLD	P09622						0.0342	0.59		TRUE
GBP5	Q96PP8	GBP5					1.53e-12	-1.9	0	TRUE
RAB2B	Q8WUD1	RAB2B					9.72e-06	-1.8		TRUE
RAB38	P57729	RAB38					0.0499	-3.49		TRUE
RAB3D	O95716	RAB3D					4.37e-13	-3.78		TRUE
RAB43	Q86YS6	RAB43					2.36e-05	-2.02		TRUE
RAB29	O14966	RAB7L					0.00113	-3.14		TRUE
RAB11A	P62491	RB11A					0.00366	-1.66		TRUE
RAB27A	P51159	RB27A					1.51e-09	-2.35		TRUE
RAB39B	Q96DA2	RB39B					0.00151	-4.04		TRUE
TIMELESS	Q9UNS1						0.0357	-0.611		TRUE
SLC27A2	O14975						0.0479	-0.687		TRUE
KIAA1524	Q8TCG1						0.0334	-0.823		TRUE
RTTN	Q86VV8						0.0471	-0.892		TRUE
CHTOP	Q9Y3Y2						0.00716	-0.903		TRUE
WBP2	Q969T9						0.0324	-0.97		TRUE
ALG10	Q5BKT4						0.00011	-1.01		TRUE
RABGAP1	Q9Y3P9						0.00939	-1.69		TRUE
FBXL20	Q96IG2						0.00969	-2.93		TRUE
