# Supplementary material for: Uncovering Protein Prenylation in Th1 Cells: Novel Prenylation Sites and Insights into Statin and Farnesyltransferase Inhibition
Source: Research Square preprint supplement (doi:10.21203/rs.3.rs-6305485/v1), 2025-04-01
Supplement: Supplementary file 3 [file 8687ba797bcdd5338e5332db.xlsx]

## Sheet: Diff_statin_TE
Supplementary Table S9. Differentially expressed proteins in total extracts comparing activated Th1 cells pretreated or not with statin, and treated with (1) mock treatment, (2) F-Az, and (3) GG-Az. The adjusted p-value (adj_pval) and log₂-transformed fold change (log2_fc) are provided, along with the average log-fold change across all three treatments (Average FC). Additionally, it is indicated …
	Significant_CntrStat_vs_Cntr		Significant_FStat_vs_F		Significant_GGStat_vs_GG		Average FC	Known prenylated
Protein_name	adj_pval	log2_fc	adj_pval	log2_fc	adj_pval	log2_fc
GNG5	0.000326552	2.52436	0.000912253	2.30532	0.0462462	1.49337	2.10768	GNG5
RAB27A	0.0122894	1.86706	0.00214704	2.07855	0.00454879	1.93854	1.96138	RAB27A
RHOA	8.8752e-10	1.82349	2.04241e-11	2.10369	7.48358e-09	1.63334	1.85351	RHOA
SPOCK2	0.00314478	1.78995			0.0256399	1.31697	1.55346
RAB1A	0.0278121	1.63653	0.0338066	1.37098			1.50376	RAB1A
RAB5C	4.38951e-05	1.54501	8.7321e-05	1.46782	0.000151141	1.43568	1.48284	RAB5C
RAB5A	0.00484711	1.50847	0.00234999	1.52651	0.00383605	1.47592	1.50363	RAB5A
RAP1A	7.01011e-09	1.50399	1.10795e-07	1.34201	7.48358e-09	1.49993	1.44864	RAP1A
GNG2	0.000326552	1.48617	0.00346635	1.15694	0.0118266	1.05958	1.23423	GNG2
RAP1B	3.05813e-05	1.17421	6.65291e-06	1.26506	5.06418e-06	1.29483	1.2447	RAP1B
SLX4	0.00127701	1.0837					1.0837
RAB2A	0.000113822	1.07812	0.000312707	0.993833			1.03598	RAB2A
RAB1B	0.00215837	1.06016	0.00279971	0.978203	0.00383605	0.973056	1.00381	RAB1B
RAB2B	0.0120498	0.917395					0.917395	RAB2B
RAB11FIP1	0.00036902	0.846286	0.00972341	0.605185	0.00162432	0.758763	0.736745
RAB21	0.0120498	0.802655	0.0010085	0.94989	0.0122052	0.75239	0.834978	RAB21
RAC2	6.26085e-06	0.691075	1.59821e-06	0.726479	1.06208e-05	0.65758	0.691711	RAC2
RAC1	0.0198672	0.609924	0.000320919	0.834077	0.000226507	0.86555	0.76985	RAC1
RAB7A	3.05813e-05	0.59988	1.90333e-07	0.775024	4.07767e-08	0.827436	0.734113	RAB7A
GBP2	0.000326552	-0.795334	0.000863249	-0.727764			-0.761549	GBP2
GFM2	0.0198672	-1.59795					-1.59795
MED12	0.0315861	-3.77854					-3.77854
GNG8			0.0189408	3.58145	0.0146616	3.99095	3.7862	GNG8
SRGN			3.18378e-05	1.92613	0.0275976	1.03235	1.47924
CD74			0.00972341	1.69555	0.0473875	1.35019	1.52287
H6PD			0.000974378	1.31969			1.31969
GZMM			0.0175835	1.14931			1.14931
SDC4			0.0231483	1.11633			1.11633
HIBCH			0.0337569	1.08121			1.08121
ECI1			0.0160642	0.928316			0.928316
EXOC3			0.0219211	0.86745			0.86745
HINT2			0.00280915	0.86263			0.86263
APOC3			0.0209394	0.851793			0.851793
NUCB1			0.00211505	0.795486	0.00154756	0.847603	0.821545
RAB6A			0.0383218	0.794297	0.0332336	0.835148	0.814723	RAB6A
CTSS			0.0207072	0.789466	0.0146616	0.896069	0.842768
NIPSNAP3A			0.0337569	0.786736	0.0443456	0.759849	0.773293
MRPL4			0.0295309	0.777493			0.777493
MUT			0.0069575	0.773149			0.773149
IREB2			0.0338066	0.765932			0.765932
CDC42			0.00688255	0.760849	0.0176447	0.683149	0.721999	CDC42
GGH			0.026389	0.73367			0.73367
B2M			0.0243402	0.725221	0.0146616	0.809281	0.767251
VAMP3			0.0100463	0.724174			0.724174
NDUFB9			0.0199638	0.715789			0.715789
NDUFA12			0.00315292	0.708165			0.708165
TAP2			0.0160642	0.706739			0.706739
AIFM1			0.00211505	0.69444			0.69444
STOML2			0.00280915	0.691181			0.691181
CD97			0.000223086	0.686283	1.44104e-05	0.809307	0.747795
HADH			0.0158829	0.682288			0.682288
HEXB			0.0305087	0.680293			0.680293
ERLEC1			0.0279008	0.674417			0.674417
ATP5B			0.00234999	0.662086			0.662086
HSPA13			0.0178752	0.633773	0.0146616	0.670348	0.65206
OXCT1			0.0031159	0.629917			0.629917
OGDH			0.00275268	0.629275			0.629275
PBXIP1			0.036441	0.623495			0.623495
IMMT			0.0069575	0.619984	0.00515808	0.657846	0.638915
NDUFS3			0.00119423	0.613338			0.613338
FURIN			0.0465538	0.610511			0.610511
BCAT2			0.0231483	0.609125			0.609125
RAB14			0.0010085	0.597796	0.00154756	0.597064	0.59743	RAB14
GLUD1			0.00275268	0.594577			0.594577
NDUFV2			0.0243736	0.594155			0.594155
C1QBP			0.0366249	0.593249			0.593249
ECH1			0.0120531	0.588923	0.00934261	0.627367	0.608145
GOT2			0.0199638	0.586213			0.586213
RAB10			0.0429835	0.586051			0.586051	RAB10
RPL19			0.00702063	-0.590395			-0.590395
MAP2K3			0.0240702	-0.592681			-0.592681
TMSB4X			0.00214704	-0.594772			-0.594772
GBP1			0.00280915	-0.597262	0.00383605	-0.594308	-0.595785	GBP1
GIMAP7			0.036441	-0.633254			-0.633254
PPP1R10			0.0358739	-0.647203			-0.647203
DEF6			3.18271e-05	-0.667827			-0.667827
CCDC86			0.0243402	-0.669951			-0.669951
FAU			0.000498198	-0.739502	0.00174629	-0.675518	-0.70751
LIMA1			0.0358739	-0.742435			-0.742435
RPL29			0.00688255	-0.80338			-0.80338
MAX			0.0279008	-0.813898			-0.813898
GSTM1			0.00234999	-0.882526			-0.882526
DCAF13			0.0440219	-0.917253			-0.917253
PCF11			0.00297824	-1.00467			-1.00467
DERA			0.0314224	-1.77706			-1.77706
RHOB					0.0368055	3.21928	3.21928	RHOB
CHEK1					0.0358111	2.14168	2.14168
ICT1					0.00364279	1.61445	1.61445
FAM162A					0.0146616	1.45926	1.45926
APP					0.0355467	1.42084	1.42084
HSP90AB4P					0.0146616	1.36221	1.36221
LEPRE1					0.00367728	1.35712	1.35712
PPHLN1					0.0215513	1.06217	1.06217
CDK5RAP2					0.0395539	1.02843	1.02843
GLG1					0.015573	1.01466	1.01466
STIM1					0.0387955	0.999112	0.999112
P4HA2					0.0476779	0.949978	0.949978
RALB					0.0376421	0.909424	0.909424	RALB
DNAJC3					0.00367728	0.903499	0.903499
LMAN2					0.0256399	0.891448	0.891448
UQCRC2					0.021881	0.863507	0.863507
ERLIN2					0.0283941	0.8622	0.8622
MED7					0.012262	0.844508	0.844508
TRAF1					0.0452791	0.835052	0.835052
MRPL43					0.0330722	0.829295	0.829295
NUCB2					0.00383605	0.82875	0.82875
CNPY4					0.0438691	0.774947	0.774947
COX7A2					0.0176447	0.770701	0.770701
NDUFS6					0.0176447	0.664916	0.664916
MRPS10					0.0260198	0.64533	0.64533
MRPS2					0.0146616	0.644857	0.644857
SEP15					0.0354701	0.637768	0.637768
BASP1					0.00383605	0.623133	0.623133
SSR4					0.0319403	0.611215	0.611215
VDAC1					0.0393048	0.606555	0.606555
RPL31					0.0423721	-0.620305	-0.620305
BZW2					0.00154756	-0.762715	-0.762715
CHMP2B					0.0330722	-0.778578	-0.778578
GBF1					0.00367728	-0.92005	-0.92005
SMN1					0.0279817	-1.31727	-1.31727
UNC119B					0.021881	-1.54948	-1.54948
