# Supplementary material for: Uncovering Protein Prenylation in Th1 Cells: Novel Prenylation Sites and Insights into Statin and Farnesyltransferase Inhibition
Source: Research Square preprint supplement (doi:10.21203/rs.3.rs-6305485/v1), 2025-04-01
Supplement: Supplementary file 4 [file b6cbb558ba98d99ff4cdd87d.xlsx]

## Sheet: Sheet1
Supplementary Table S6. Differentially expressed proteins in total extracts comparing activated and non-activated Th1 cells treated with 1) mock treatment, 2) F-Az, and 3) GG-Az. The adjusted p-value (adj_pval) and log-transformed fold change (log2_fc) are provided together with the average log-fold change over all three treatments.
	Significant_CntrAct_vs_Cntr		Significant_FAct_vs_F		Significant_GGAct_vs_GG		Average log2_fc
Protein_name	adj_pval	log2_fc	adj_pval	log2_fc	adj_pval	log2_fc
EGR2	0.00409048	3.50367	0.002167	4.18863	0.00419341	3.75307	3.81512
REL	8.32457e-07	4.1272	8.52076e-06	3.63709	5.39028e-06	3.62594	3.79674
IFNG	0.00528291	3.62526	0.0116633	3.43681	0.0126202	3.34605	3.46937
JUNB	5.47568e-05	2.99406	6.08772e-05	3.47538	9.81917e-05	3.16291	3.21078
RHOC	0.00911726	3.11472					3.11472
HECTD4	0.0147251	2.96879	0.019752	3.12793			3.04836
TTC38					0.0209979	3.0192	3.0192
GZMB	0.00470929	2.89079	0.0124883	2.71332	0.00723627	2.86314	2.82242
NR4A3	0.0218494	2.72592					2.72592
FOSL2	0.0151068	2.6746					2.6746
SGK223	0.00585073	2.42377	7.46657e-05	3.27384	0.00843029	2.12035	2.60599
ZBED2	0.0316029	2.54675					2.54675
ZFP36L1	0.0482246	2.48793					2.48793
TNFRSF4	0.00187362	2.38336	0.00217424	2.81633	0.00843848	2.18937	2.46302
GRAMD1B	1.18454e-06	2.36543	0.000755495	2.39902	6.53918e-05	2.30508	2.35651
LAG3	0.0117657	2.33189					2.33189
CLUH	0.00749996	1.85362	0.00165055	2.4367	0.0305349	1.5711	1.95381
YRDC					0.0145053	1.95271	1.95271
IRF4	0.000157258	1.65986	6.08772e-05	1.98428	3.26183e-05	2.04819	1.89744
YBX3	0.00656691	1.78355			0.0102994	1.78485	1.7842
CTNNA1	0.00749996	1.73638					1.73638
UCK2	7.76998e-05	1.74858	0.000503988	1.67345	0.000139981	1.75303	1.72502
CDK6	2.08824e-05	1.86781	0.000526134	1.47491	9.81917e-05	1.71145	1.68472
BCL2L1	0.000123849	1.57675	0.000132943	1.59311	5.55203e-05	1.79243	1.6541
RILPL2			0.000362817	1.73956	0.00032384	1.55002	1.64479
NAMPT	2.20032e-06	1.53849	9.93415e-06	1.51044	3.1389e-07	1.84616	1.6317
IVNS1ABP	0.0187671	1.55583			0.0217171	1.62774	1.59178
HMGCS1	2.82935e-05	1.51797	1.399e-05	1.78181	0.000108294	1.41545	1.57174
NAB2	0.00358816	1.75556	0.0203344	1.23565	0.00789516	1.67447	1.55523
TRMT1	0.00895301	1.54842					1.54842
MID1IP1	5.73422e-05	1.93542	0.000304317	1.68055	0.0224583	1.02044	1.54547
RUNX2	1.28636e-05	1.54404	0.0199596	1.16076	1.76885e-05	1.80438	1.50306
PLCB3					0.0134457	1.46923	1.46923
OIP5			0.0449144	1.45916			1.45916
MAGED1			0.0323828	1.45068			1.45068
MGRN1	0.0325853	1.23927	0.0198495	1.64129			1.44028
SIPA1L1	0.00886873	1.4233					1.4233
TBX21	0.0178287	0.997232	0.002167	1.43675	0.000284403	1.74029	1.39142
SIAH2	0.00415793	1.38249			0.0094179	1.32214	1.35232
JUND	0.000269571	1.71196			0.0364629	0.953798	1.33288
NOP14	0.0365509	1.29375			0.030234	1.3417	1.31772
C12orf57			0.00527888	1.31632			1.31632
POLD4			0.0265913	1.31018			1.31018
BHLHE40					0.000848965	1.29694	1.29694
WDR54			0.0259768	1.28308			1.28308
CLIC4			0.0324248	1.28269			1.28269
C3	0.0226913	1.24984					1.24984
TXNL4B	0.00871479	1.24206					1.24206
SAMSN1	1.18454e-06	1.10232	8.85085e-07	1.21224	4.70664e-08	1.40644	1.24034
TUBB6	0.0440549	1.23457					1.23457
LARP4	0.000331542	1.37241	0.00221291	1.19133	0.00285634	1.13402	1.23259
NFATC1	6.00397e-05	1.2957	0.00027817	1.21234	0.000251737	1.1889	1.23231
ADO	0.00084687	1.39356	0.00335094	1.20155	0.0122579	1.05534	1.21682
DESI1	0.000885069	1.51566	0.0158373	1.07259	0.0172919	1.03302	1.20709
RAD51	0.00682268	1.2069					1.2069
HECTD1	0.0151608	1.20547					1.20547
KANSL3			0.000538077	1.20491			1.20491
ASNSD1					0.0426274	1.20306	1.20306
PFKFB3	0.00645984	1.18273					1.18273
DHX30	0.000595141	1.16817					1.16817
PTMS	0.00966129	1.08206			0.00596524	1.22918	1.15562
PTPRE	0.00396294	1.28358	0.0305512	1.02355			1.15356
POLR1A	0.000882664	1.17748	0.00239098	1.12243			1.14995
CCDC86	0.000363926	1.14416					1.14416
CDC123	0.00685034	1.05785	0.00843528	1.10874	0.00260229	1.26039	1.14232
LIMA1					0.0115152	1.11747	1.11747
FAM195A					0.0134457	1.09937	1.09937
GPATCH4					0.00764615	1.09823	1.09823
CLK3	0.039309	1.09592					1.09592
PIP5K1A	0.0120841	1.08528	0.0249678	1.10648			1.09588
SNX9	0.00430746	0.899098	0.0186462	0.791377	3.26568e-05	1.58773	1.09274
SLC7A5	0.0292788	1.09791			0.0446587	1.07986	1.08888
CHTF8					0.0222892	1.07465	1.07465
BLM					0.0438016	1.06043	1.06043
SLC1A5	0.0420835	1.0399					1.0399
UBE2E2	0.0258673	0.799227	0.0148788	1.27929			1.03926
ZFYVE1					0.0430151	1.03708	1.03708
PRRC2B			0.00246519	1.01327			1.01327
PGRMC2	0.0478541	0.999157					0.999157
NSA2	0.0291354	0.991927			0.0255788	0.998847	0.995387
HK2	0.000925061	0.961375	0.000864602	1.03128	0.00127413	0.984097	0.992251
UTP6					0.0279711	0.986079	0.986079
MTHFD2	0.0118791	0.983961					0.983961
MAP1LC3B2	0.000484025	1.04043	0.000216584	1.22261	0.0205685	0.685204	0.982748
SH2D2A	0.00333391	0.820183	0.00740674	0.791593	5.55203e-05	1.31446	0.975413
CAMK1	0.00391826	0.913164	0.0243075	0.79973	0.00201439	1.20682	0.973238
RRM2	0.0114774	1.04151	0.0423467	0.903479			0.972496
ATP5H	0.0412509	0.961971					0.961971
TRIP10	0.0160818	0.906474	0.0136892	1.01388			0.960178
POMP	0.00799787	0.886021	0.000963193	1.13121	0.0115152	0.823103	0.946778
GTPBP4	0.00121155	1.00353			0.00530066	0.889198	0.946364
TYMS	0.0343108	0.929395	0.0457849	0.963245			0.94632
ECD	0.0256492	0.937806					0.937806
WDR3	0.0331998	0.923799			0.0408733	0.948221	0.93601
ERCC1	0.02	0.935104					0.935104
DCUN1D5	0.0294175	0.932737					0.932737
SMN1	0.040077	0.925011					0.925011
RRP1	0.00561625	1.07462			0.0391582	0.772252	0.923434
NPM3	0.0282726	0.855336	0.0220016	0.974052			0.914694
CBLB	0.00865903	0.954286	0.0259529	0.871685			0.912986
TNFAIP8			0.000864602	0.728689	1.07499e-05	1.09599	0.912342
METTL2A	0.000710304	0.910716					0.910716
SQSTM1	0.0218747	0.836199			0.0122579	0.977613	0.906906
TFRC	0.0316758	0.900986					0.900986
NFKBIA	0.0411715	0.964565	0.0202779	0.818716			0.89164
SARM1					0.012978	0.886766	0.886766
RBPJ	0.000386648	0.851616	0.000729786	0.852051	0.000201706	0.9539	0.885855
C12orf45			0.0124883	0.881392			0.881392
UAP1	0.0331201	0.880789					0.880789
AK6	0.000102456	1.06556	0.0100254	0.688316			0.876939
SLC16A1					0.0357101	0.875506	0.875506
IRGQ	0.0272605	0.777875	0.0176997	0.970372			0.874124
RRP12	0.00780115	0.769152	0.0141112	0.764246	0.000848965	1.06389	0.865762
DDX21	6.04254e-05	0.97207	0.00059722	0.837707	0.000941019	0.785506	0.865094
RAB27A	0.0027167	0.950901	0.00474113	0.951388	0.0336337	0.692449	0.864913
ATXN2	0.000565789	1.05332	0.0305532	0.673965			0.863642
OGFOD1	0.00271852	0.976225			0.0183523	0.747356	0.86179
SLFN11					0.017845	0.861319	0.861319
MAPKAPK2			0.0411565	0.861244			0.861244
FABP5	4.17315e-05	0.895782	0.00041675	0.774786	5.55203e-05	0.912754	0.861107
FRMD4B	0.00595938	0.912154			0.0197859	0.809445	0.860799
OSBPL10	0.00591254	0.852039					0.852039
DLGAP5	0.0329511	0.850662					0.850662
RRP7A	0.00584384	0.90725	0.0251968	0.786269			0.846759
NOLC1	1.27352e-05	0.877954	7.46657e-05	0.815045			0.846499
HDAC7			0.00838393	0.756861	0.00138699	0.935846	0.846354
EIF4ENIF1	0.00226232	0.71215	0.000168888	1.01242	0.00064071	0.81109	0.845219
PYROXD1	0.0272628	0.838146					0.838146
IKZF3	0.0487749	0.837057					0.837057
IRF2BP2	0.000510144	0.738835	0.00041675	0.816776	5.67073e-05	0.955527	0.837046
SPG20					0.0376519	0.836273	0.836273
RRP1B	0.0120841	0.860616	0.0314754	0.797036			0.828826
LAT	0.0105998	0.828436					0.828436
MAP2K3	6.0547e-05	0.883287	0.000274708	0.831332	0.000498946	0.759998	0.824872
AGFG2	0.00136095	0.783023	0.00102189	0.862481			0.822752
CD3EAP	0.0011289	0.821918					0.821918
LIG3	0.0114584	0.775143	0.00705254	0.893765	0.016392	0.777403	0.815437
MDC1	0.017231	0.737258			0.00760281	0.887616	0.812437
HSF1			0.038162	0.810341			0.810341
SATB1	0.000953986	0.821622	0.00220074	0.7989			0.810261
ZFAND5	0.0153897	0.788343	0.0309291	0.811413			0.799878
PRMT3	0.000313365	0.984221	0.00740674	0.729308	0.0111655	0.67885	0.79746
CETN3	0.0120388	0.814778	0.0243499	0.772024			0.793401
KPNA2	0.00054124	0.927832	0.0176058	0.650714			0.789273
DNMT3A	0.00608232	0.876093	0.0411565	0.701473			0.788783
RAD18	0.0369448	0.785992					0.785992
NUDT4					0.017541	0.783545	0.783545
RSL24D1	0.00117893	0.802567			0.00452005	0.76424	0.783404
PDCD2L	0.00693754	0.783253					0.783253
PLIN3			0.0205717	0.782973			0.782973
WDR74	0.000696226	0.771893					0.771893
ZC3H7B	0.0415227	0.771626					0.771626
TRMT2A	0.0123139	0.771235					0.771235
KTI12	0.0275316	0.768248					0.768248
RREB1					0.0271381	0.765602	0.765602
AGFG1	0.000135786	0.753039	0.000126875	0.815652	0.000324999	0.720661	0.763118
MPHOSPH8	0.0116288	0.761721					0.761721
OTUD6B	0.00121539	0.759724					0.759724
CCNT1	5.6873e-05	0.838032	0.000216584	0.799836	0.00161277	0.636431	0.7581
DDA1	0.027297	0.757976					0.757976
SRPK1	3.70264e-05	0.757486					0.757486
TRMT10C	0.0218494	0.749627					0.749627
LMNA					0.016392	0.748892	0.748892
HDAC2			0.0352627	0.748173			0.748173
RNF181	0.0193597	0.745832					0.745832
POLR1B	0.00418396	0.729988			0.00490107	0.757452	0.74372
MTDH	0.0377644	0.740565					0.740565
EED	9.00157e-06	0.950149	0.000660509	0.670068	0.00188659	0.591818	0.737345
RPUSD2					0.0295147	0.736654	0.736654
PDLIM7			0.0238444	0.736573			0.736573
BCOR	0.0325927	0.73054					0.73054
CCNB1	0.0190337	0.729566					0.729566
IMP3	0.0193004	0.727899					0.727899
ATXN3			0.0173384	0.727861			0.727861
SERPINB8	0.00725435	0.727464					0.727464
DENND4A					0.0126312	0.727324	0.727324
AURKA					0.0406787	0.725865	0.725865
ACACA	0.0325927	0.634558	0.0220016	0.743162	0.0122933	0.795667	0.724462
CSDE1	1.40787e-06	0.723275					0.723275
RPS13	0.0114584	0.719156					0.719156
PUS7	0.00443678	0.799841			0.0304796	0.630458	0.71515
GEMIN4	0.014767	0.695743	0.0072141	0.834085	0.0424838	0.612811	0.714213
PES1	0.000331542	0.712623					0.712623
RDX					0.0195141	0.710329	0.710329
PPP1R2					0.00255098	0.709594	0.709594
TOP1	0.00456371	0.660885	0.00622388	0.679958	0.00179684	0.782622	0.707822
RRS1	0.030014	0.705504					0.705504
SRXN1	0.042145	0.704586					0.704586
SP140	0.0269455	0.70251					0.70251
DIMT1	0.00893638	0.735683	0.0277831	0.66788			0.701782
RPL37A	0.0202741	0.701572					0.701572
PYCR1	0.0138869	0.694875	0.0100625	0.744418	0.0189153	0.662907	0.700733
CCDC6			0.00619754	0.700163			0.700163
KLC2	0.0191296	0.699574					0.699574
KATNB1			0.0473405	0.69869			0.69869
KAT8			0.0259871	0.696229			0.696229
HSPH1	1.40787e-06	0.74388	1.62152e-05	0.648071			0.695976
P0DPB6	0.00548026	0.690897					0.690897
CDK12	0.00409048	0.688424					0.688424
PHF6	1.40787e-06	0.686875					0.686875
C11orf73					0.0420847	0.686422	0.686422
RPL31	0.000696226	0.686019					0.686019
FTSJ3	0.0125256	0.685574					0.685574
PSMB6	0.00649401	0.64811	0.00614166	0.702507	0.0060383	0.693902	0.681507
ASNS			0.0083073	0.661969	0.00490107	0.699526	0.680748
RPL34	0.0443189	0.67592					0.67592
SMARCA4			0.02927	0.675301			0.675301
NUFIP2	0.0039824	0.767569	0.0371554	0.589922	0.017911	0.654154	0.670548
SSSCA1	0.00895301	0.59607			0.00253419	0.744581	0.670325
NMD3	0.0165212	0.669438					0.669438
DDX47	0.000538713	0.667916					0.667916
TRAF1	0.000260834	0.667353					0.667353
PCM1			0.0323724	0.667002			0.667002
DDX51	0.0179937	0.658961					0.658961
IPO11	0.0415223	0.656382					0.656382
PWP2	0.0155708	0.652725					0.652725
NOP16	0.0282059	0.651101					0.651101
GNL2			0.0305532	0.630202	0.0188046	0.668748	0.649475
FDFT1			0.0268763	0.649346			0.649346
GLS	0.0278964	0.647105					0.647105
GBP2			6.08772e-05	0.652626	5.55203e-05	0.638125	0.645375
ALDH18A1	0.0325927	0.645149					0.645149
TTC5	0.0123139	0.661284			0.0172264	0.628686	0.644985
LTV1	0.00514057	0.643562					0.643562
EXOSC10	0.0123139	0.643012					0.643012
ACY1			0.035289	0.639818			0.639818
NOP2	0.00152162	0.638932					0.638932
MAPRE2					0.000941019	0.634884	0.634884
IMP4	0.0427005	0.628969					0.628969
LYAR	0.0146213	0.626464					0.626464
DHPS	0.0271094	0.625456					0.625456
BZW1	1.40787e-06	0.621892					0.621892
WDR36					0.0169902	0.621333	0.621333
HEATR1	7.12764e-05	0.62041					0.62041
NOC4L	0.000602469	0.619944					0.619944
UTP18	0.0129913	0.61783					0.61783
CCNH	0.0027167	0.617562					0.617562
WDR43	1.27352e-05	0.617072					0.617072
CTPS1	1.47684e-06	0.631944			6.19614e-06	0.601407	0.616675
MPHOSPH10	0.00186398	0.609022					0.609022
E2F4	0.0432227	0.607473					0.607473
SMS					0.000275152	0.602229	0.602229
CIRH1A	6.04254e-05	0.600773					0.600773
KDM3A					0.0294485	0.599202	0.599202
YTHDF2			0.0449144	0.598703			0.598703
HDLBP	1.90265e-05	0.598522					0.598522
ATXN10	9.5199e-06	0.595303					0.595303
RPP25L			0.0249678	0.591222			0.591222
BOP1	0.0166743	0.590789					0.590789
FAU	0.0211084	0.587139					0.587139
ABCF2	0.000247214	0.587033					0.587033
ARHGAP27	0.0382674	-0.585905					-0.585905
RNF213			0.0221597	-0.587679			-0.587679
RBM4B			0.0305512	-0.587832			-0.587832
COX6B1			0.00877463	-0.58933			-0.58933
NSL1					0.0176067	-0.591069	-0.591069
WIBG	0.030208	-0.591295					-0.591295
CAST	0.00959779	-0.592139					-0.592139
EHD1	0.000481269	-0.592218					-0.592218
MAPK1			0.0058538	-0.596433	0.00558361	-0.592014	-0.594223
DYRK1A			0.00877463	-0.599773			-0.599773
NDUFA2					0.037888	-0.609996	-0.609996
MRPS10			0.0180466	-0.616088			-0.616088
RUFY1	0.000280611	-0.617851					-0.617851
PARVG	0.00170835	-0.618193					-0.618193
SASH3	0.000236658	-0.616616	0.00041675	-0.626846			-0.621731
SEP6	2.23916e-05	-0.622861					-0.622861
PCYT1A	0.0019136	-0.622177			0.00278977	-0.624231	-0.623204
DENND4C			0.0386923	-0.625521			-0.625521
IL16	0.00621683	-0.625641					-0.625641
PRKD2	0.0117336	-0.629211					-0.629211
BCL11B	0.00172133	-0.636986	0.00480276	-0.604098	0.00242743	-0.648301	-0.629795
ERP29	0.000247214	-0.59271			0.000123814	-0.667775	-0.630243
GIMAP4	0.00358816	-0.628354	0.00584493	-0.632494			-0.630424
MYO18A					0.00200652	-0.630622	-0.630622
ARHGAP25					0.000324999	-0.634121	-0.634121
ALAD			0.0199638	-0.634438			-0.634438
HEBP2			0.042539	-0.635196			-0.635196
DYNLT1					0.00138699	-0.63927	-0.63927
EML4	0.000173961	-0.686505	0.00127615	-0.59518			-0.640842
ASF1B					0.0182757	-0.642759	-0.642759
TAGLN2	0.00980172	-0.647301					-0.647301
FLNB	0.00140484	-0.628226			0.00141185	-0.666574	-0.6474
ATP2B4	0.0330167	-0.638355			0.0386625	-0.662168	-0.650261
ADH5	0.000381539	-0.65254					-0.65254
CBL			0.0243711	-0.652644			-0.652644
STMN1	0.00253464	-0.690748	0.0120438	-0.607255	0.00490107	-0.673598	-0.6572
THEMIS	0.000233858	-0.691511			0.000968594	-0.626157	-0.658834
NUCB1			0.0263452	-0.695003	0.0409732	-0.623926	-0.659464
UBR7					0.00622568	-0.660064	-0.660064
TBCC	0.00561625	-0.66513					-0.66513
APOL2	0.010442	-0.665462					-0.665462
TBCE	0.0104854	-0.665918					-0.665918
ERAP1					0.0216366	-0.666346	-0.666346
NDUFS4					0.00622568	-0.669346	-0.669346
PLCB2					0.0391582	-0.67077	-0.67077
MRPL23	0.0226517	-0.671058					-0.671058
ZZEF1			0.0136892	-0.671835			-0.671835
ACAP2	0.0139821	-0.641817	0.0133752	-0.702651			-0.672234
CASP1	0.00147834	-0.782047	0.0137516	-0.633541	0.0158648	-0.60677	-0.67412
FLOT2	0.0231885	-0.676679					-0.676679
DYNLL2	0.0184854	-0.677075					-0.677075
FN3KRP	0.00473493	-0.677197					-0.677197
SH2D1A	0.00322106	-0.70253	0.00943812	-0.654071			-0.678301
HNRNPH2	0.00826616	-0.695403	0.0198092	-0.661273			-0.678338
COTL1	0.00141181	-0.679507					-0.679507
TMED4			0.0230332	-0.682003			-0.682003
NDRG1	0.000142876	-0.70692			0.000471854	-0.657319	-0.68212
NFATC2	9.05086e-06	-0.668635	1.5963e-05	-0.695962			-0.682298
MRPL38	0.035685	-0.682489					-0.682489
CAPNS1	0.000326668	-0.766988	0.00403072	-0.618546	0.00184694	-0.670739	-0.685424
CHMP7					0.00259956	-0.687239	-0.687239
LCK	0.00226428	-0.687796					-0.687796
MTX1	0.0325287	-0.636066			0.0278138	-0.739613	-0.68784
SLC9A3R1	0.000247214	-0.678638	0.00077584	-0.642769	0.000146102	-0.746475	-0.689294
CORO7	8.98369e-05	-0.779275			0.00161277	-0.618431	-0.698853
RGS14	0.0224714	-0.702846					-0.702846
CHCHD3	0.017231	-0.713203	0.0417157	-0.666982	0.0216942	-0.732355	-0.70418
DCK	0.00692619	-0.706486					-0.706486
OPTN	0.000541533	-0.801418	0.00381361	-0.690107	0.00622568	-0.638914	-0.710146
VIM	6.68726e-05	-0.807511			0.00184721	-0.613235	-0.710373
HTRA2	0.0114871	-0.711094					-0.711094
MRPL13	0.0325853	-0.717081					-0.717081
TES	9.05086e-06	-0.852251	0.00059722	-0.613307	0.000153273	-0.687132	-0.717564
SPTAN1	2.08824e-05	-0.799471	0.000443056	-0.646805	0.000139981	-0.708243	-0.718173
RNF166	0.00916613	-0.720145					-0.720145
KIAA0196	0.0182661	-0.720673					-0.720673
PYGO2	0.0279066	-0.586402			0.00963655	-0.864275	-0.725338
DGKZ	0.0164246	-0.688666	0.0145379	-0.764121			-0.726393
PLEKHA2	0.0209883	-0.72668					-0.72668
ARHGAP30	2.46524e-05	-0.857604			0.00174871	-0.596984	-0.727294
GRN			0.0219389	-0.679138	0.00770683	-0.778888	-0.729013
GANAB					0.000168169	-0.738206	-0.738206
GLRX	5.03372e-05	-0.926441	0.00322246	-0.641543	0.00255098	-0.650617	-0.739534
BCR			0.0209614	-0.753281			-0.753281
PARP14	1.61412e-05	-0.808163	0.000217803	-0.68573	5.55203e-05	-0.770605	-0.754832
MRPL41	0.041468	-0.756814					-0.756814
CPOX	0.000124461	-0.869936	0.00232027	-0.684525	0.00138699	-0.721205	-0.758555
ETFDH	0.0432517	-0.759599					-0.759599
CRIP1	0.0155708	-0.753162	0.0489954	-0.671576	0.00955938	-0.862341	-0.76236
ARHGAP4	4.25687e-05	-0.82801	0.000263645	-0.751746	0.000284403	-0.721211	-0.766989
ARHGAP9	0.00351173	-0.77045					-0.77045
SIT1					0.0231541	-0.770814	-0.770814
N4BP1	0.0297792	-0.771172					-0.771172
KLF13	0.00871479	-0.748473	0.00171943	-0.737464	0.0009047	-0.829907	-0.771948
STAT1	2.90169e-05	-0.842053	0.000439291	-0.703644			-0.772848
TNIP1	0.0316585	-0.777338					-0.777338
SNTB1	1.59456e-05	-0.885071			0.000504009	-0.669609	-0.77734
EPB41	0.0210139	-0.761079			0.0235678	-0.795558	-0.778319
SPTBN1	5.67819e-05	-0.858245	0.000646917	-0.724946	0.000352408	-0.753748	-0.77898
ANXA2	0.0244431	-0.7827					-0.7827
NDUFS6			0.0106943	-0.783095			-0.783095
RAB11FIP1			0.0470886	-0.790438			-0.790438
MAN2B1	0.000486903	-0.749645	0.00320878	-0.649282	5.55203e-05	-0.97411	-0.791013
MRRF					0.0321142	-0.79137	-0.79137
PLBD2	0.0301341	-0.764244			0.0290781	-0.819857	-0.79205
TUBB3	0.00871479	-0.87778			0.0415608	-0.715969	-0.796874
LEF1	0.0278964	-0.797011					-0.797011
ARHGDIB	1.27352e-05	-0.797428					-0.797428
MAP4K1			0.0273585	-0.797489			-0.797489
DOCK11	0.00664562	-0.902523			0.0409732	-0.70929	-0.805906
SMAD3	2.83842e-06	-0.980601	0.000652229	-0.633395			-0.806998
INPP5D	9.00157e-06	-0.917076	0.000120463	-0.775125	0.000155576	-0.734449	-0.808883
TRADD	9.63558e-06	-0.850729	7.46657e-05	-0.76839	3.38135e-05	-0.808742	-0.809287
GPRIN3	0.0372545	-0.809634					-0.809634
FYB	0.00183814	-1.02397	0.0449144	-0.694522	0.0287348	-0.734824	-0.817772
TRIM41	0.0452024	-0.818874					-0.818874
RINT1					0.0324361	-0.819918	-0.819918
INPP4A	0.00226561	-0.853848	0.000864602	-1.01424	0.0380291	-0.594936	-0.821009
SEP9	6.47339e-06	-0.823803					-0.823803
KIAA0101					0.00321528	-0.823895	-0.823895
IRF9	0.00816885	-0.825064					-0.825064
ICAM3	0.0215349	-0.825701					-0.825701
PTPRCAP	0.0107826	-0.851711			0.0231541	-0.801409	-0.82656
SH3KBP1	0.000150461	-0.827466					-0.827466
SUN2					0.0430151	-0.827721	-0.827721
RPS6KA5	1.16602e-05	-0.907311			0.000146102	-0.753632	-0.830471
ADD1	0.000142876	-0.85261	0.00104858	-0.740195	0.000139981	-0.900496	-0.831101
CLPB			0.0398305	-0.632424	0.0046123	-1.04602	-0.83922
DTX3L	0.00663697	-0.845196	0.0136892	-0.824484	0.00909144	-0.858176	-0.842619
DSN1	0.00986658	-0.846511					-0.846511
VPS37B	0.00226428	-0.747483	0.00120604	-0.855267	0.000436217	-0.938728	-0.847159
ADA	0.00392384	-0.848036					-0.848036
ITGB7					0.0352215	-0.849334	-0.849334
S100A10	0.00037666	-0.778947	0.00149873	-0.719113	2.80538e-05	-1.06147	-0.853177
ACSF3					0.0380291	-0.854632	-0.854632
RCSD1	0.00023405	-0.854869					-0.854869
WDFY1	0.00721148	-0.855474					-0.855474
VRK3	0.00158097	-0.860982					-0.860982
ACOT1	0.0270492	-0.810048	0.0221597	-0.911898	0.0271746	-0.862524	-0.86149
BIN1	0.000973307	-0.978744	0.00440915	-0.878265	0.0146491	-0.730887	-0.862632
ITGB2	0.0377644	-0.810735			0.0275058	-0.922239	-0.866487
TPMT	0.0359601	-0.868073					-0.868073
EIF4E3	0.0129913	-0.871755					-0.871755
GAA	0.00896337	-0.837509	0.00877463	-0.906988			-0.872248
MINK1	0.010623	-0.872875					-0.872875
SOS1					0.0262027	-0.873971	-0.873971
HMHA1	9.73979e-05	-1.00297	0.00175282	-0.799579	0.0012852	-0.821201	-0.874582
CD47					0.0260778	-0.877841	-0.877841
S100A11	0.00151292	-0.881684					-0.881684
PYCARD	3.50978e-05	-1.04309	0.000526134	-0.864035	0.00179684	-0.743845	-0.883657
STK10	2.78199e-08	-1.027	5.18303e-06	-0.75744	3.1389e-07	-0.872538	-0.885661
CAPN2	0.0148558	-0.79074	0.0365626	-0.737459	0.00141686	-1.14406	-0.890753
ERAP2					0.0126312	-0.893054	-0.893054
CASP6	0.00325942	-0.895614					-0.895614
TRAF3IP3	0.0347017	-0.897532					-0.897532
SAMHD1	9.00157e-06	-1.00319	0.000120463	-0.8493	0.000106128	-0.840223	-0.897572
ANKRD13A	0.0113908	-0.898284					-0.898284
NDUFB9	0.0270617	-0.898752					-0.898752
RNF31	0.00376863	-1.02848	0.0411309	-0.771286			-0.899883
CNN2	4.17315e-05	-1.06901	0.00235246	-0.756768	0.000512251	-0.877041	-0.90094
NOSIP	0.000687668	-0.885182	0.00403072	-0.774391	0.000196551	-1.05502	-0.904866
TAF9B	0.0487749	-0.906133					-0.906133
GALT	0.0117952	-0.909073					-0.909073
ARSA	0.000770387	-1.07362	0.0256033	-0.674681	0.00259956	-0.997118	-0.91514
NR2C2	0.0146973	-0.916948					-0.916948
ITGAL	0.0187671	-0.924809					-0.924809
GLB1	0.00480662	-1.04373			0.0313802	-0.825336	-0.934535
APOL3	0.00373489	-1.10538	0.047198	-0.805962	0.0220487	-0.903032	-0.938126
HDAC4	0.00647421	-0.942812					-0.942812
AHNAK	5.02823e-05	-1.04808	0.000830913	-0.845508	0.00022594	-0.949309	-0.947633
CD27	0.0224714	-0.95305					-0.95305
CAPG	0.00965496	-0.961045					-0.961045
EVL	5.54721e-05	-1.19366	0.002167	-0.881834	0.00378406	-0.809623	-0.961707
PSAP	0.000419039	-0.989456	0.00221291	-0.882864	0.000454149	-1.02984	-0.967387
TUBA1A	0.0053943	-0.967416					-0.967416
ANXA1	8.62428e-05	-1.01236	0.000468306	-0.929773	0.000234311	-0.96757	-0.9699
GRAP2	1.40787e-06	-1.02556	1.16148e-05	-0.950414	7.42808e-06	-0.937354	-0.971109
OPA1			0.0401123	-0.872019	0.00993009	-1.0709	-0.971462
CTSA	0.0137867	-0.984511	0.0256949	-0.964207	0.0295147	-0.972919	-0.973879
CASP10					0.00225319	-0.973933	-0.973933
CST7	0.025625	-0.978313					-0.978313
DNASE2	0.00277698	-0.948928	0.0017418	-1.01045	0.00660611	-0.980309	-0.979897
S100A4	0.000331542	-1.15413	0.00885173	-0.843288	0.00217479	-0.994339	-0.997254
TBC1D10C	0.000214367	-1.05982	0.000503988	-1.04233	0.00175263	-0.896107	-0.999419
RASSF2	0.000696226	-1.0569	0.00615065	-0.877938	0.000941019	-1.07992	-1.00492
HEXB	0.000100083	-0.922266	0.000117541	-0.988774	2.75613e-05	-1.1157	-1.00891
MESDC2					0.0299791	-1.02125	-1.02125
CPPED1	0.024179	-1.03018					-1.03018
GIMAP8	0.000207051	-1.09822	0.000646096	-1.04196	0.0012852	-0.957433	-1.03254
INPP5K	0.0255404	-1.03524					-1.03524
GIMAP7	0.00409048	-1.09961			0.0136956	-0.978955	-1.03928
TRAT1	0.016586	-1.04378					-1.04378
CCM2	0.00141181	-1.10474	0.0393101	-0.790571	0.000799378	-1.24531	-1.04687
BIN2	2.8962e-06	-1.20571	8.94665e-05	-0.968364	5.55203e-05	-0.98047	-1.05152
SP140L					0.0359381	-1.0547	-1.0547
CARD16	0.00298072	-1.14747	0.00239098	-0.941782	0.00105712	-1.07556	-1.05494
KEAP1			0.0160719	-1.05669			-1.05669
NAGA	0.0088871	-0.92942	0.0244201	-0.860605	0.00037922	-1.41278	-1.0676
ADD3	5.54721e-05	-1.10741	0.000246118	-1.03595	0.000139981	-1.06942	-1.07093
SKAP1	0.00484793	-1.07667					-1.07667
PDCD4	0.00130476	-1.40435	0.0278576	-0.999184	0.0403696	-0.906789	-1.10344
LRRC8C	0.0269331	-1.11254					-1.11254
SLFN5	0.000157258	-1.33165	0.0026668	-1.05041	0.00463135	-0.972389	-1.11815
PDPR					0.000941019	-1.11942	-1.11942
TRBC1					0.00752164	-1.11986	-1.11986
PXN	7.52263e-07	-1.31618	4.80309e-05	-0.950038	5.65308e-06	-1.11299	-1.1264
FLI1	0.0222017	-1.0089			0.00789516	-1.25885	-1.13388
PPP2R5C	0.0183901	-1.136					-1.136
HEXA	0.0187671	-1.23416			0.0470682	-1.05102	-1.14259
IAH1	0.0114228	-1.14776					-1.14776
CTSC	8.56967e-05	-1.32135	0.00549026	-0.907913	0.000234311	-1.26178	-1.16368
CD5	0.000665918	-1.51809	0.0227234	-1.03518	0.0300426	-0.961966	-1.17174
MRPL47	0.00522398	-1.17353					-1.17353
PRCP	0.00114567	-1.20534			0.00249833	-1.16344	-1.18439
PLCL2	0.00140484	-1.19605					-1.19605
VAMP8	0.041468	-1.1965					-1.1965
BID	9.05086e-06	-1.34127	0.000117541	-1.08311	3.68317e-05	-1.17396	-1.19945
ITGA4	0.0129913	-1.02879			0.0023631	-1.37334	-1.20107
GNS	0.000464106	-1.10331	0.00221796	-0.935256	7.42808e-06	-1.60786	-1.21548
PPT1	0.0197383	-1.19668			0.0215541	-1.26028	-1.22848
GBA	0.030014	-1.24239					-1.24239
FGD3	8.6139e-06	-1.33253	7.31482e-05	-1.18456	3.68317e-05	-1.22119	-1.24609
CASP7	0.0278964	-1.24962					-1.24962
GGH	0.0432967	-1.03696	0.028463	-1.22744	0.00749679	-1.48473	-1.24971
DPYD	0.0131732	-1.26189					-1.26189
FAM101B	0.000520369	-1.59038	0.029432	-0.939708			-1.26504
LACTB	0.00395654	-1.16849	0.00166222	-1.38487	0.00274477	-1.2812	-1.27819
AIFM1					0.0465886	-1.28452	-1.28452
LIMD2	2.08824e-05	-1.37796	0.000490811	-1.10266	2.73553e-05	-1.44685	-1.30916
STK38	0.000538713	-1.44249	0.00968473	-1.09664	0.000698532	-1.47857	-1.33923
CAMK4	0.00409048	-1.35726					-1.35726
HPSE	0.000528508	-1.46618	0.00041675	-1.25014			-1.35816
CTSD	2.33487e-05	-1.36459	0.00041675	-1.12344	7.2445e-06	-1.60826	-1.36543
GOT2	0.0124041	-1.36595					-1.36595
RNASET2	2.82783e-05	-1.58733	0.000806456	-1.22453	0.000284403	-1.33151	-1.38112
TPP1	0.00480395	-1.5437			0.0101087	-1.47043	-1.50706
LBR					0.0222981	-1.5192	-1.5192
GIMAP5	0.000102456	-1.59669	0.000526134	-1.46573			-1.53121
MAP3K1					0.00161277	-1.53347	-1.53347
RASGRP2	8.89155e-05	-1.76533	0.0109031	-1.1753	0.000241687	-1.68487	-1.54183
CTSS	0.00226232	-1.58416	0.002048	-1.48869	0.00179684	-1.5757	-1.54952
PHF11					0.0273005	-1.57238	-1.57238
CEP55					0.0113547	-1.60111	-1.60111
MYO1F	6.47339e-06	-2.07492	0.00265623	-1.28184	0.000161232	-1.59977	-1.65217
GYG1	0.00118595	-1.86849	0.00450491	-1.70596	0.0137543	-1.43319	-1.66921
NPC2	0.00249022	-1.88188			0.00864068	-1.68671	-1.78429
IFI30					0.0246565	-1.80112	-1.80112
PHF23	0.00604221	-1.8139					-1.8139
CD247			0.0168354	-1.80262	0.0263922	-2.0127	-1.90766
TIMP1	0.00867777	-2.05096			0.00335641	-2.41072	-2.23084
GZMA					0.0426344	-2.33819	-2.33819
LGALS3BP	0.039309	-2.32255			0.0230317	-2.46672	-2.39463
ABLIM1	0.0187671	-2.62686	0.0191041	-2.36619			-2.49652
TXNIP	0.0482246	-2.82228					-2.82228
AKR1C3	0.041468	-3.06396					-3.06396
FAM65B	0.000155913	-3.34385	0.000117541	-3.70828	0.000511826	-3.06952	-3.37388
SELL	1.40787e-06	-4.60979	1.62152e-05	-4.23651	5.2286e-07	-5.12193	-4.65608
ARHGAP12	5.03275e-06	-7.01636					-7.01636
