# Supplementary material for: Uncovering Protein Prenylation in Th1 Cells: Novel Prenylation Sites and Insights into Statin and Farnesyltransferase Inhibition
Source: Research Square preprint supplement (doi:10.21203/rs.3.rs-6305485/v1), 2025-04-01
Supplement: Supplementary file 5 [file c193209608ffa644f7bf4f81.xlsx]

## Sheet: Supplementary_Table_S1
Supplementary Table S1. Significantly enriched proteins from enrichment samples treated with F-Az or GG-Az compared to the respective mock controls in two experiments: (Exp 1) comparison of activated vs. non-activated Th1 cells, and (Exp 2) comparison of activated Th1 cells with and without statin pre-treatment. Additional information includes whether the proteins are known to be prenylated, whet…
Protein_ID	Protein_Name	Exp1 Activated Th1 Faz vs bg	Exp1 Non-act Th1 Faz vs bg	Exp1 Activated Th1 GGAz vs bg	Exp1 Non-act Th1 GGAz vs bg	Exp2 Minstat Faz vs bg	Exp2 Statin Faz vs bg	Exp2 Minstat GGAz vs bg	Exp2 Statin GGAz vs bg	known prenylated	non_canonical isoform	Motif (0=known, 1=new, 2=internal)	PositionC Known_Motif CaaX	PositionC Known_Motif CXXX	PositionCs Known_Motif CXC	PositionCs Known_Motif CCX	PositionCs Known_Motif CC	PositionC Known_Motif C	PositionC New_Motif CXXXX	PositionC New_Motif CXX	PositionC New_Motif CX	PositionCs New_Motif CCC	PositionC Internal C_1	PositionC Internal C_1_wo_disulfide_bond	PositionC Internal pae_0	PositionC Internal Lowest_pae	Sequence Internal_Motif	3Di_Internal_Motif
A0A1W2PQL4	A0A1W2PQL4	0	0	0	0	1	1	0	0	0		2													-295		KHPVTCSHFTQ	δδδδδδδδδδδ
Q13685	AAMP	0	0	0	0	1	1	0	0	0		2														-7	KAKVFCVQRPD	μιγιηγδδδπδ
Q9NP58	ABCB6	0	0	0	0	0	0	1	1	0		2
O75027	ABCB7	0	1	0	0	0	0	0	0	0		0			[-3, -1]
Q9NUJ1	ABHD10	0	0	0	0	0	1	0	0	0		2													-292		AAWVPCRSWGW	δδδδδδδδδδδ
Q8N2K0	ABHD12	1	0	0	0	0	0	0	0	0		2
O95870	ABHD16A	1	1	0	0	1	1	1	1	0		2													-354		VKKLPCQITSY	ββθββλβββλβ
P09110	ACAA1	1	1	0	0	1	1	0	0	0		2													-399		PQAAPCLSGAP	πππδπδπχππδ
Q15027	ACAP1	0	0	0	0	1	1	0	0	0		2													-731		LDFEECLKDSP	δδλβθλλββδπ
P49753	ACOT2	0	0	0	0	0	1	0	0	0		2
O14734	ACOT8	1	1	0	0	1	1	0	0	0		2													-307		EDGQGCGDRGD	δδδδδδδδδδδ
Q15067	ACOX1	1	1	1	0	1	1	1	1	0		2													-462		ITKGKCYGLHA	ηφπνδτπττφτ
O15254	ACOX3	0	0	0	0	0	0	1	1	0		2														-223	VHDGACFRSPL	βππβδαχδηπβ
P11117	ACP2	0	0	0	0	0	0	0	1	0		2													-36		VALAVCGSILF	βββββββββββ
O95573	ACSL3	0	1	0	0	0	0	0	0	0		2
Q9ULC5	ACSL5	0	0	0	0	0	0	1	1	0		2
O14672	ADAM10	1	1	1	1	0	0	0	0	0		2
P51828	ADCY7	0	0	0	1	0	0	0	0	0		2
P35611	ADD1	0	0	0	0	1	1	0	0	0		2
Q9NX46	ADPRHL2	0	0	0	0	0	0	1	1	0		2													-232		LLNPKCRDVFE	σππππππδλλβ
P25098	ADRBK1	0	0	0	0	1	1	0	0	0		2													-570		KELLACSHPFS	βθββββνηχδδ
Q53H12	AGK	1	1	0	0	1	1	1	1	0		2														-403	TTAGLCLLTWG	νββββββββββ
Q9NRZ7	AGPAT3	0	0	0	0	0	0	1	1	0		2														-343	NFVQLCTLALW	λββλββλββθθ
Q86UL3	AGPAT6	0	0	0	0	0	0	1	1	0		2													-338		DIFYFCRKGME	σββββββββββ
Q6RW13	AGTRAP	0	0	0	0	0	0	1	1	0		2
Q8IZ83	ALDH16A1	0	0	0	0	1	1	0	0	0	2	1										[-3, -2, -1]
P30837	ALDH1B1	1	1	0	0	1	1	0	0	0		2													-349		DGQHFCFTRHE	δδχωτκικδωα
P49189	ALDH9A1	1	1	0	0	1	1	0	0	0		2														-11	QLKTVCVEMGD	δμδμδιδδπδδ
Q9BT22	ALG1	1	1	0	0	0	0	0	0	0		2
Q5BKT4	ALG10	0	0	0	0	0	0	1	1	0		2														-189	SSHEACLHFPQ	βχχφφδχχβθλ
Q2TAA5	ALG11	0	0	0	0	0	0	1	1	0		2
Q92685	ALG3	0	0	0	0	1	1	1	1	0		2													-418		QAEGLCKQWLQ	βββββββββββ
Q9Y673	ALG5	0	0	0	0	0	1	0	0	0		2
Q9BVK2	ALG8	0	0	0	0	1	1	0	0	0		2
Q9H6U8	ALG9	0	0	0	0	0	0	1	1	0		2
Q9UKV5	AMFR	0	0	0	0	1	1	0	0	0		2
Q9UJX4	ANAPC5	0	0	0	0	0	0	1	1	0		2
Q9H8Y5	ANKZF1	0	0	0	0	1	1	1	1	0		2
P04114	APOB	0	0	0	0	0	1	0	0	0		2
Q9BQE5	APOL2	1	1	0	0	0	0	0	0	0		2											-172		-172		VAGITCSVVEL	δδπρχπσλβββ
O95236	APOL3	0	1	0	0	0	0	0	0	0		0		-4
Q7Z2E3	APTX	0	0	0	0	0	1	0	0	0		2													-196		SNSGQCSVPLK	δδδδδδδδδδδ
P53367	ARFIP1	0	0	0	0	0	0	1	1	0		2											-236		-236		LNTYKCTRQII	βλββλλββχββ
Q15041	ARL6IP1	1	0	1	1	1	1	1	1	0		2													-95		RFHEICSNLVK	βσσββσσββσβ
Q8N6S5	ARL6IP6	0	0	1	1	0	0	0	0	0		1								-3
P32121	ARRB2	0	1	0	0	0	0	0	0	0		0						-1
Q9Y294	ASF1A	1	1	0	0	1	1	0	0	0		1									-2
Q9NVI7	ATAD3A	0	0	0	0	1	1	1	1	0		2
Q5T9A4	ATAD3B	0	0	0	0	1	1	1	1	0	2	0		-4
Q7Z3C6	ATG9A	0	0	0	0	1	0	0	0	0		2													-76		SASYPCAAPRP	δδδδδδδδδδδ
Q8NHH9	ATL2	0	0	0	0	1	1	1	1	0		2
P98196	ATP11A	0	0	0	0	0	0	1	1	0		2
Q9Y2G3	ATP11B	1	1	1	1	0	0	0	0	0		0						-1
P54709	ATP1B3	1	0	1	1	1	0	0	0	0		2														-152	KNLTVCPDGAL	πχαδδφδωχαα
P16615	ATP2A2	1	1	0	0	0	0	0	0	0		2
P36542	ATP5C1	0	0	0	0	0	1	0	0	0		2											-196		-196		SDRGLCGAIHS	αχδδλλπθφλβ
Q9Y487	ATP6V0A2	0	0	0	0	0	0	1	1	0		2
P21283	ATP6V1C1	0	0	0	0	0	0	1	1	0		2
Q9UBB4	ATXN10	0	1	0	0	0	0	0	0	0		2														-120	FSNCGCVRAEG	σδλεδδπδδδδ
Q9Y679	AUP1	0	0	0	0	0	0	1	1	0		2													-86		LAKTGCVDLTI	θββρβδσββσβ
P46379	BAG6	1	1	0	1	1	1	0	0	0		2													-942		LPYLQCRGGPQ	δππββπδδπδδ
Q16611	BAK1	1	0	0	0	1	1	0	0	0		2
Q07812	BAX	1	1	1	1	1	1	1	1	0	5	1								-3
Q9UHQ4	BCAP29	0	0	0	0	0	0	1	1	0		2
P10415	BCL2	0	0	0	0	1	1	1	1	0		2
Q14137	BOP1	0	0	0	0	1	1	0	0	0		2
Q8WY22	BRI3BP	0	0	0	0	1	0	0	0	0		2
Q5VW32	BROX	1	1	0	0	0	1	0	0	1		0		-4
Q10589	BST2	0	0	0	0	1	1	1	1	0		2
O14981	BTAF1	0	0	0	0	1	1	1	1	0		2
Q5T2E6	C10orf76	0	0	0	0	0	0	0	1	0		2														-649	EDPSKCSPRFW	δχπθββπβθσλ
Q9UKR5	C14orf1	0	0	0	0	0	0	1	1	0		2
Q8TCD1	C18orf32	1	1	1	1	0	0	0	0	0		2													-6		GPTEICDKKKD	δδδδδδδδδδδ
Q96EU7	C1GALT1C1	0	0	0	0	0	1	0	0	0		2													-300		LGSIFCALITM	βββββββββββ
Q8WWC4	C2orf47	0	0	0	0	0	0	0	1	0		2
P01024	C3	0	0	0	0	1	1	0	0	0		1								-3
Q6NW34	C3orf17	0	0	0	0	1	1	0	0	0		2
Q5T6V5	C9orf64	0	0	0	0	0	0	1	1	0		0		-4
Q9H9S4	CAB39L	0	0	0	0	0	0	1	1	0		2
P27824	CANX	0	0	1	1	0	0	0	0	0		2
P20807	CAPN3	0	0	0	0	0	0	1	1	0		2
P47756	CAPZB	1	1	0	0	1	0	0	0	0		0						-1
P32248	CCR7	1	1	0	0	1	1	1	1	0		2
P78371	CCT2	1	1	0	0	0	0	0	0	0		0						-1
P48509	CD151	0	0	0	0	1	1	0	1	0		2														-243	EKKTTCGTVCL	πβπθδπβλββλ
P41217	CD200	0	0	0	0	0	0	1	1	0		2												-251	-251		AAVVLCTAQVQ	ββββββππδφδ
P11049	CD37	0	0	0	0	1	1	1	1	0		2														-251	GSLIFCFGIWI	λββλλβχλβθθ
P28907	CD38	1	1	1	1	1	1	1	1	0	2	0		-4
P04234	CD3D	1	1	1	1	1	1	1	1	0		2													-48		ALGVFCFAGHE	βββββββββββ
P16070	CD44	1	0	1	1	0	0	0	0	0		2													-730		AAWGLCLVPLS	ββββββπππππ
Q08722	CD47	0	0	1	1	0	0	1	1	0		2
P06127	CD5	0	0	1	1	0	0	0	0	0		2
P19397	CD53	1	1	1	0	1	1	1	1	0		2
P08962	CD63	1	1	1	1	0	0	0	0	0		2
Q07108	CD69	1	0	1	0	0	0	0	0	0		2
P09564	CD7	1	1	0	0	0	0	1	1	0		2													-11		MSHSRCNTLSS	πδδπδδδδδδδ
P04233	CD74	1	0	0	0	0	1	0	0	0		2
P60033	CD81	1	1	1	1	1	1	0	0	0		2														-231	MGVEGCTKCIK	δδφδδπλββλλ
P27701	CD82	1	1	1	1	1	1	1	1	0		2														-263	MGSACIKVTK
P48960	CD97	0	0	0	1	0	0	0	1	0		2													-826		VFLAFCVWLTL	δδδδδδδδδδδ
Q13042	CDC16	0	0	0	0	0	0	0	1	0		2													-77		KDKLKCYDFDV	ππβββπππππθ
P60953	CDC42	0	1	1	1	0	1	0	1	2		0	-4
O14735	CDIPT	0	0	0	0	1	1	1	1	0		2														-183	FYFMPCCPLTA	λβθλβππλβσσ
P49454	CENPF	0	1	0	0	0	1	0	0	1		0		-4
Q6P2H3	CEP85	1	1	0	0	0	1	0	0	1		0		-4
Q5SZL2	CEP85L	0	1	0	0	1	1	0	0	0		0		-4
Q96G23	CERS2	1	0	1	0	0	0	0	0	0		2
Q8N5B7	CERS5	1	1	1	1	0	0	0	0	0		2													-269		VRKIQCWFRHR	σβσσββσσβσβ
Q9BSY4	CHCHD5	0	0	0	0	1	0	0	0	0	2	1								-3
Q9NPF2	CHST11	0	0	0	0	0	0	0	1	0		2
Q07065	CKAP4	1	1	0	0	0	0	0	0	0		2
Q9NY35	CLDND1	1	1	1	1	0	0	0	0	0		2
Q96KA5	CLPTM1L	0	0	0	0	1	1	1	1	0		2
P53675	CLTCL1	0	0	1	1	0	0	0	0	0		2
Q9NX76	CMTM6	0	0	0	0	0	0	0	1	0		2														-94	ILIVYCTPFYE	λνσθβσγθβθβ
Q96FZ5	CMTM7	0	0	0	0	1	1	0	0	0		2
Q8IYT2	CMTR2	0	0	0	0	1	1	0	0	0		2													-767		MSKCRKTPV
O95406	CNIH1	0	0	0	0	1	1	1	1	0		2
P09543	CNP	0	1	1	1	0	1	0	0	2		0		-4
Q9UBI1	COMMD3	0	0	0	0	0	0	1	1	0		2													-26		EISFSCSMEQL	ιδιδιδγπβββ
Q86VX2	COMMD7	0	0	0	0	1	1	1	1	0		0			[-3, -1]
P21964	COMT	1	1	1	1	0	0	0	0	0		2														-238	WGWGLCLIGWN	χνπχββββθθχ
P61201	COPS2	0	0	0	0	1	1	1	1	0		2
Q7KZN9	COX15	0	0	0	0	0	0	0	1	0		2
Q5RI15	COX20	0	0	0	0	0	0	1	1	0		2														-60	RIRRSCDVGVG	δβββσβββσββ
Q8NE35	CPEB3	0	0	0	0	1	1	0	0	0		2													-269		SSPTRCQNGER	δδδδδδδδδδπ
Q5TA45	CPSF3L	0	0	0	0	0	0	1	1	0		2
P50416	CPT1A	0	0	0	0	1	1	0	0	0		2
P23786	CPT2	0	0	0	0	0	0	1	1	0		2
P49682	CXCR3	0	0	0	1	0	0	0	0	0		2													-31		LLRLGCPNQRG	ββθββθβπππδ
Q8NBI2	CYB561A3	0	1	1	1	0	0	1	1	0		2
O14569	CYB561D2	0	0	0	0	0	0	1	1	0		2														-44	LLLGMCSLWFT	χλσβθβδπσνπ
O43169	CYB5B	1	1	1	1	1	1	1	0	0		2
P00387	CYB5R3	0	0	1	1	0	0	0	0	0		0		-4
Q16850	CYP51A1	0	1	0	0	0	0	0	0	0		2
P11182	DBT	0	0	0	0	1	1	0	0	0		2
Q5TAQ9	DCAF8	1	1	0	0	0	0	0	0	1		0		-4
Q96C86	DCPS	0	0	0	0	1	1	0	0	0		2													-301		VGNGTCAPVRL	δδδδδπδδδδδ
Q96HY6	DDRGK1	0	0	0	0	1	0	0	0	0	2	2
Q15392	DHCR24	1	1	1	1	0	0	0	0	0		2
Q9UBM7	DHCR7	1	0	0	0	0	0	0	0	0		2													-358		SLPDFCHKFLP	ππααπθββπππ
P10515	DLAT	1	1	0	0	0	0	0	0	0		2
P31689	DNAJA1	1	1	0	0	1	1	0	0	1		0		-4
O60884	DNAJA2	1	1	0	0	1	1	0	0	1		0		-4
Q8WW22	DNAJA4	1	1	0	0	1	1	0	0	1		0		-4
Q96KC8	DNAJC1	0	1	0	1	0	0	0	0	0		2
Q9NVH1	DNAJC11	0	0	0	0	1	1	1	1	0		2													-522		AYRRLCMLYHP	σλββλθββλβλ
Q13217	DNAJC3	0	0	0	0	1	1	0	0	0		2													-474		YEGAECGVNAD	βπππππδδπβλ
Q9H3Z4	DNAJC5	1	1	1	1	1	1	1	1	0		2														-63	CCCGKCKPKAP	ββπδππδπππδ
Q9H3H5	DPAGT1	1	0	1	1	1	1	1	1	0		2
Q9BVM2	DPCD	1	1	0	0	1	1	0	0	1		0		-4
Q9P2X0	DPM3	1	1	0	0	1	1	0	0	0		2
P27487	DPP4	1	0	1	0	1	1	1	1	0		1							-5
Q2PZI1	DPY19L1	0	0	0	0	0	0	1	1	0		2
Q13409	DYNC1I2	0	0	0	0	1	1	1	1	0		2
Q15125	EBP	1	0	1	1	1	0	0	0	0		2
P42126	ECI1	0	0	0	0	1	1	0	0	0		2
O75521	ECI2	1	0	0	0	1	1	0	0	0		2
Q7Z2Z2	EFTUD1	0	0	0	0	0	1	0	0	0		2
Q8N3D4	EHBP1L1	1	1	0	0	0	0	0	0	0		0	-4
P60228	EIF3E	0	0	0	0	0	1	0	0	0		2
Q92556	ELMO1	1	1	0	0	1	0	0	0	0		1									-2
Q9BW60	ELOVL1	1	1	1	0	1	0	0	0	0		2
O00423	EML1	0	0	0	0	0	0	0	1	0		2													-795		SLLQFCNDDSA	βββββππδπδπ
P54852	EMP3	1	1	1	1	1	1	1	1	0		2
O94919	ENDOD1	0	1	0	0	1	1	1	1	0		2
Q9Y6X5	ENPP4	0	0	0	0	0	1	0	0	0		2													-31		LTMLTCLIIIM	βββββββββββ
P34913	EPHX2	1	1	1	1	0	0	1	1	0		2
Q9C0D9	EPT1	0	0	0	0	0	0	1	1	0		2
Q96RQ1	ERGIC2	0	0	0	0	0	0	0	1	0		2													-59		FFVRLCGIVGG	σβββσβθσσββ
Q7Z2K6	ERMP1	1	1	0	0	1	1	0	0	0		2													-862		PLVDGCSGGGR	δδδδδδδδδδδ
Q96HE7	ERO1L	0	0	0	0	0	1	0	0	0		2												-303	-303		SSDNFCEADDI	βπχαλαδπρπσ
P34910	EVI2B	0	1	0	0	0	0	0	0	0		2
Q9UI08	EVL	0	0	0	0	1	1	0	0	0		2
Q9Y624	F11R	1	1	1	1	0	0	0	0	0		2
P16930	FAH	0	0	0	0	1	1	0	0	0		2													-315		TELRKCAFISQ	ββσβββρμδγν
Q8NC44	FAM134A	0	0	1	1	0	0	0	0	0		2
Q86VR2	FAM134C	0	0	0	0	0	0	1	1	0		2
Q96A26	FAM162A	1	1	0	0	0	0	0	0	0		2													-114		RINGFCTKPQE	δδπδδδδδδδδ
Q9BUT9	FAM195A	1	0	0	0	0	0	0	0	0		1									-2
Q8IW50	FAM219A	1	1	0	0	1	1	0	0	0		0		-4
Q96IG2	FBXL20	0	0	0	0	0	1	0	0	0		0	-4
Q86XK2	FBXO11	0	0	0	0	0	1	0	0	0		2													-815		PKRTACPTKNS	δδδδδδδψδδδ
Q8TB52	FBXO30	0	0	0	0	1	0	0	0	0		2
P37268	FDFT1	1	1	0	0	0	0	0	0	0		2
Q14318	FKBP8	1	1	0	0	0	0	0	0	0		2
O75955	FLOT1	0	0	0	0	1	1	1	1	0		2														-411	VVSGFCRSPPV	ωκδφδπαββιδ
Q9HA64	FN3KRP	0	0	0	0	1	1	0	0	0		2													-299		RRELGCSSVRA	θββββφπδκδω
Q5VW36	FOCAD	0	0	0	0	1	1	1	1	0		2
Q14331	FRG1	1	1	0	0	0	0	0	0	0		1									-2
O94915	FRYL	0	0	0	0	1	1	0	0	0		2
P51116	FXR2	0	0	0	0	0	1	0	0	0		2
Q14697	GANAB	0	0	0	0	0	1	0	0	0	3	0		-4
Q04446	GBE1	0	0	0	0	0	1	0	0	0		2
P32455	GBP1	1	1	0	0	1	1	0	0	1		0		-4
P32456	GBP2	0	0	1	1	1	1	1	0	2		0		-4
Q96PP8	GBP5	0	0	1	1	1	0	1	0	2		0	-4
Q9NZC3	GDE1	0	0	0	1	0	0	1	1	0		1							-5
P19440	GGT1	0	0	0	0	0	0	1	1	0		2													-547		VIVGLCLWLPS	ββββθββππππ
Q9H3K2	GHITM	1	1	1	1	1	1	1	1	0		2													-338		AARLVCLRTLP	δδδδπδδδδδδ
Q9UG22	GIMAP2	1	0	0	0	0	0	0	0	0		2
P32189	GK	0	0	0	0	0	1	0	0	0		2													-26		DPSIFCSLPLG	ππβπβπδπδββ
P17900	GM2A	0	1	0	0	0	0	0	0	0		2														-69	PTGEPCPEPLR	πππδχδδππθν
Q14344	GNA13	0	0	0	0	0	0	1	1	0		2
P04899	GNAI2	0	0	1	0	0	0	0	0	2		0	-4
P50151	GNG10	0	1	0	0	0	1	0	0	2		0	-4
P59768	GNG2	1	1	1	1	1	1	0	0	2		0	-4
P63218	GNG5	1	1	1	1	1	1	1	1	2		0		-4
Q9UK08	GNG8	0	0	0	0	0	1	0	0	2		0	-4
O14610	GNGT2	1	1	0	0	1	1	0	0	1		0	-4
O15228	GNPAT	0	0	0	0	0	0	1	1	0		2														-608	PIDIKCSVLNS	χβνλλβθλλπδ
Q7Z5G4	GOLGA7	0	0	0	0	0	0	1	1	0		2													-114		SSGTRCQFQTK	πβηδαλατδλδ
O14653	GOSR2	0	0	0	0	0	0	1	1	0		2
Q9NPR9	GPR108	0	0	0	0	0	0	1	1	0		2													-514		LLLGGCSGRIH	λπδφαφδφδφδ
Q9Y4H4	GPSM3	1	1	0	0	0	0	0	0	0		0						-1
P78347	GTF2I	0	1	0	0	0	0	0	0	0		2
O95479	H6PD	0	0	0	0	0	1	0	0	0		2													-632		NINSSCRPGPG	σθχπηνγδδπν
Q9UJ83	HACL1	0	0	0	0	1	1	0	0	0		2														-68	VVPPMCLLPNS	ρπδπγγηδηπδ
Q16836	HADH	0	0	0	0	1	1	0	0	0		2											-104		-104		KHPVSCKDTPG	ηηψδψφψρδρρ
P12081	HARS	1	1	0	0	0	0	0	0	0		0			[-3, -1]
O94927	HAUS5	1	1	0	0	0	0	0	0	0		1									-2
Q7Z4H7	HAUS6	0	0	0	0	1	1	0	0	0	2	0						-1
P07686	HEXB	0	0	0	0	1	1	0	1	0		2													-553		MELCGLGLP
Q6NVY1	HIBCH	0	0	0	0	0	0	1	1	0	2	1								-3
P10321	HLA-C	1	0	0	0	0	0	0	0	0		1								-3
P35914	HMGCL	1	1	0	0	1	1	0	0	0		1								-3
P30519	HMOX2	1	1	0	0	1	1	0	0	0		2
P01112	HRAS	1	1	0	0	0	1	0	0	1		0	-4
P51659	HSD17B4	1	1	1	1	0	0	0	0	0		2													-460		NWKKICDFENA	θβθνρπδρδβτ
Q96D96	HVCN1	0	0	0	0	0	0	1	1	0		2
P13598	ICAM2	0	0	0	1	0	0	0	0	0		2													-31		TSVLLCFIFGQ	βββββββββββ
P32942	ICAM3	0	0	0	0	1	1	1	1	0		2
O60725	ICMT	0	0	0	0	0	0	1	1	0		2													-281		MAGCAARAP
Q9Y6W8	ICOS	1	1	0	1	1	1	1	1	0		2
P13164	IFITM1	0	0	0	0	1	1	1	1	0		2													-42		ASTAKCLNIWA	βββσββσβββσ
Q12905	ILF2	0	0	0	0	1	1	0	0	0		2
A1L0T0	ILVBL	0	0	0	0	0	0	1	1	0		2													-611		FLLLACGTLVA	βββββββββββ
Q27J81	INF2	0	0	0	0	0	1	0	0	0		0	-4
Q14642	INPP5A	0	0	0	0	0	1	0	0	1		0	-4
Q9UI26	IPO11	0	0	0	0	1	1	0	0	0		2													-82		GTYKDCMLMSH	ρατδρνλαδδπ
O15397	IPO8	0	0	0	0	0	0	1	1	0		2
Q96P70	IPO9	0	0	0	0	1	1	0	1	0		2													-952		VETHWCAQSEK	λχααδδππρπν
P53990	IST1	0	0	0	0	1	1	0	0	0		2
P13612	ITGA4	0	0	0	0	0	1	0	0	0		2													-1008		VMLLLCLGVPT	βββββββπδππ
P20701	ITGAL	0	0	0	0	1	1	0	0	0		2
P05556	ITGB1	1	0	1	1	1	1	1	1	0		2
P05107	ITGB2	1	1	1	1	1	1	1	1	0		2												-751	-751		LLSLGCVLSQE	ππππδπππχφφ
O15554	KCNN4	0	0	0	0	0	1	0	0	0		2														-301	VRGPPCVQDLG	πδρδπβββθβπ
P24390	KDELR1	0	0	0	0	1	1	1	1	0		2													-21		QTVLYCDFFYL	σνββθπβσββχ
P33947	KDELR2	1	1	1	1	0	0	0	0	0		2													-21		QTILYCDFFYL	σνββθπβσββχ
Q06136	KDSR	0	0	0	0	0	0	0	1	0		2														-15	SIVRRCMMQRE	βσβββββββββ
Q12768	KIAA0196	0	0	0	0	0	0	1	1	0		2
Q69YN4	KIAA1429	0	0	0	0	1	1	0	1	0	4	1							-5
Q68DE3	KIAA2018	0	0	0	0	0	1	0	0	0		1							-5
Q7Z4S6	KIF21A	0	0	0	0	1	1	0	0	0		2
Q2VIQ3	KIF4B	0	0	0	0	1	1	1	1	0		2
O60282	KIF5C	0	0	0	0	1	1	0	0	0		2
P52294	KPNA1	0	0	0	0	1	1	1	1	0		2													-10		YIFQQCEAPME	γηδδπππδπππ
P01116	KRAS	1	1	0	0	1	1	0	0	1		0	-4
Q8N6L1	KRTCAP2	0	0	0	0	0	0	1	1	0		2
P11279	LAMP1	0	0	0	0	1	1	0	0	0		2												-393	-393		LGLMHCASAAM	ππδπππχαωεω
P13473	LAMP2	1	1	0	0	0	0	0	0	0		2
Q6IAA8	LAMTOR1	1	0	0	0	0	0	0	0	0		2
Q13571	LAPTM5	1	1	1	1	1	1	0	1	0		2													-213		HGKASCKLSQM	βππδδδδδπβθ
P06239	LCK	1	0	1	0	0	0	0	0	0		2
Q9Y2U8	LEMD3	0	0	0	0	1	1	1	1	0		2
O95214	LEPROTL1	0	0	0	0	0	0	1	1	0		2
Q99732	LITAF	1	1	1	1	0	0	1	1	0		2
Q9NUN5	LMBRD1	0	0	0	0	0	0	1	1	0		2
Q68DH5	LMBRD2	0	0	0	0	0	0	1	1	0		2													-317		EWYWECLLRPW	βσθβρνπβσσβ
Q9BU23	LMF2	1	1	1	1	0	0	0	0	0		2
P20700	LMNB1	1	1	0	0	1	1	0	0	1		0	-4
Q03252	LMNB2	1	1	0	0	1	1	0	0	1		0		-4
Q9C0E8	LNP	0	0	0	0	0	0	1	1	0		2
Q8NF37	LPCAT1	0	0	0	0	1	1	1	1	0		2
Q6P1A2	LPCAT3	1	0	1	1	1	1	1	1	0		2														-218	PFWFRCMYMLI	δλββλλβσλλβ
Q96AG4	LRRC59	0	1	0	0	0	0	0	0	0		2
Q32MZ4	LRRFIP1	1	1	0	0	1	1	0	0	1		0		-4
P20645	M6PR	0	0	0	0	1	1	1	1	0		2													-271		FPFYSCWRTGL	δπβππββββββ
Q9Y5V3	MAGED1	1	0	0	0	0	0	0	0	0		2
Q9H0U3	MAGT1	0	0	1	1	0	0	0	0	0		2
P36507	MAP2K2	0	0	0	0	1	1	0	1	0		2														-52	EFVNKCLIKNP	βλσβλσνδνπσ
Q16644	MAPKAPK3	1	1	0	0	1	1	0	0	0		0		-4
Q7Z434	MAVS	0	1	0	0	0	0	0	0	0	3	0		-4
Q9BTE3	MCMBP	0	1	0	0	0	0	0	0	0		2
Q9Y2X0	MED16	0	0	0	0	1	1	0	0	0		2													-876		MCDLRRP
Q14728	MFSD10	0	0	0	0	1	1	1	1	0		2													-447		GGGGGCTPRPP	δδδδδδδδδδδ
Q6N075	MFSD5	0	0	0	0	1	1	1	1	0		2													-418		PPGRACSNPSF	δδδπχππδπβν
Q9BQP7	MGME1	0	1	0	0	0	0	0	0	0		2
Q99735	MGST2	0	0	0	0	0	1	0	0	0	2	0						-1
O14880	MGST3	0	1	0	0	1	1	1	1	0		0				[-3, -2]
Q8TDZ2	MICAL1	0	0	0	0	0	1	0	0	0		2
O94851	MICAL2	0	0	0	0	1	1	1	1	0		2
Q9BRT3	MIEN1	0	0	0	0	1	0	0	0	2		0	-4
Q8IUF8	MINA	0	0	0	0	1	1	0	0	0		2													-447		EGPAPCKQMKL	δδδδδδδππππ
Q8N4C8	MINK1	0	0	0	0	0	0	1	1	0		1							-5
Q9BVC4	MLST8	0	0	0	0	0	1	0	0	0		2														-206	SRNLQCQRIFQ	δπβσδτδδιδγ
Q8N4V1	MMGT1	0	0	0	0	0	0	0	1	0		2											-75		-75		AFAVTCYGIVH	σββσνββσβββ
Q7Z3U7	MON2	0	0	0	0	0	0	1	1	0		2													-1204		ELETECQTTTE	βββββββββππ
O95297	MPZL1	0	0	0	0	0	0	1	1	0		2												-67	-67		RDYTGCSTSES	ββββππδδδπδ
Q9BZE1	MRPL37	0	0	0	0	1	1	1	1	0		2														-58	TTDLDCNEGVK	τσνρηδσγδγγ
Q8N5N7	MRPL50	0	1	0	0	0	0	0	0	0		2
Q9NZJ7	MTCH1	0	0	0	0	1	1	0	1	0		1							-5
Q9Y6C9	MTCH2	1	0	0	0	0	1	0	0	0		2
P00395	MT-CO1	0	1	0	0	0	0	0	0	0		2											-16		-16		EWLYGCPPPYH	σθβχηγηρδστ
P00414	MT-CO3	1	1	1	0	0	1	0	0	0		2											-44		-44		TFLTICFIRQL	βλσβββσβθσβ
P00156	MT-CYB	1	1	1	1	1	1	0	0	0		2
P03905	MT-ND4	0	0	0	0	0	1	0	0	0		2													-408		NNLFSCSPTFS	χδωαδπδλφφτ
P03915	MT-ND5	0	0	0	0	1	1	0	0	0		2
P42345	MTOR	0	0	0	0	1	1	0	0	0		0		-4
Q96S97	MYADM	0	0	0	0	1	1	1	1	0		2
Q9BQG0	MYBBP1A	0	0	0	0	0	0	1	0	0		2
Q7Z406	MYH14	0	0	0	0	0	0	1	1	0		2
P13535	MYH8	0	0	0	0	1	1	1	1	0		2
Q5VZE5	NAA35	0	0	0	0	1	1	0	0	0		2													-686		DFEEACRELKL	ββββββββδδπ
P55209	NAP1L1	1	1	0	0	1	1	0	0	1		0		-4
Q99733	NAP1L4	1	1	0	0	1	1	0	0	1	2	0		-4
Q6ZNJ1	NBEAL2	0	0	0	0	1	1	1	1	0		2
P42695	NCAPD3	0	0	0	0	1	1	1	1	0		2
Q9UBB6	NCDN	0	0	0	0	0	0	1	1	0		1							-5
Q6PIU2	NCEH1	1	0	0	0	1	1	1	1	0		2													-404		MRSSCVLLTA
Q9NV92	NDFIP2	0	0	1	0	0	0	1	1	0		2
O00483	NDUFA4	0	0	0	0	1	1	0	1	0		2											-38		-38		FNPDVCWDRNN	λπχβηδπδπβθ
O75438	NDUFB1	1	0	0	0	0	1	0	0	0		2											-34		-34		GFVIGCYLDRK	βββββββββββ
O96000	NDUFB10	0	0	0	0	0	1	0	0	0		2
O95169	NDUFB8	1	1	0	0	1	1	0	0	0		2
Q8TD19	NEK9	0	0	0	0	1	0	0	0	0		1							-5
Q8NCF5	NFATC2IP	0	0	0	0	1	1	0	0	0		2													-188		QDLRSCLSPKP	βββθβββδδδδ
Q9BPW8	NIPSNAP1	0	0	0	0	1	1	0	1	0		2													-279		MAPRLCSISVT	δδδδδδδδδδδ
Q9Y3T9	NOC2L	0	0	0	0	0	0	0	1	0		2
O15118	NPC1	0	0	0	0	0	0	1	1	0		2
P01111	NRAS	1	1	0	0	1	1	0	0	1		0	-4
Q9UHY1	NRBP1	0	0	0	0	1	1	0	0	0		2
Q9H7Z3	NRDE2	0	0	0	0	1	1	0	0	0		2
Q8IXM6	NRM	1	1	1	1	0	0	1	1	0		2
Q15738	NSDHL	0	0	0	1	0	0	0	0	0		2														-34	FHYYSCERAKK	ηψδηδρββσθβ
Q8WV22	NSMCE1	0	0	0	0	0	0	1	1	0		2													-227		RLQTHCYKVHD	βσσββσθββρπ
P49902	NT5C2	0	0	0	0	1	1	1	1	0		2													-15		QEITHCHDEDD	πδδπδδγσπδπ
P57740	NUP107	0	0	0	0	1	1	0	0	0		2													-848		QPDISCILGTG	δδδπδδδδδδδ
Q8NFH5	NUP35	0	0	0	0	1	1	0	0	0		2													-72		ESSDRCALSSP	βββθθββπδδπ
Q9NX40	OCIAD1	1	1	0	0	1	1	0	0	0		2
Q9BXB4	OSBPL11	0	0	0	0	1	1	0	0	0		2
P22234	PAICS	0	0	0	0	1	1	0	0	0		1								-3
Q15365	PCBP1	1	1	0	0	1	0	0	0	0		1									-2
Q9UHG3	PCYOX1	0	0	0	0	0	0	0	1	0		2
P29803	PDHA2	0	0	0	0	0	0	1	1	0		2
O96011	PEX11B	0	1	0	0	1	1	1	1	0		2													-107		QESSACSRRLK	βββββββββββ
Q92968	PEX13	0	0	0	0	0	0	1	1	0		2											-184		-184		EGTVACLGAED	ββββπππδδδδ
P40855	PEX19	1	1	0	0	1	1	0	0	1		0	-4
P08237	PFKM	0	0	0	0	1	1	1	0	0		2														-262	QFDELCIPFVV	πηχσσληφψεψ
Q93100	PHKB	1	1	0	0	0	1	0	0	1		0	-4
Q9H490	PIGU	0	0	0	0	0	0	1	1	0		2
Q99640	PKMYT1	0	0	0	0	1	1	0	0	0		2
Q99541	PLIN2	0	0	0	0	1	1	0	0	0		2
O15162	PLSCR1	0	0	0	0	1	1	0	0	0		2														-224	QPPLNCPPGLE	δαδππδφπλλρ
Q9NRY6	PLSCR3	1	1	0	0	0	0	0	0	0		2
Q10713	PMPCA	0	0	0	0	1	1	1	1	0		2													-506		SGSWGCSRLRF	πδδδδπδπδδδ
Q9Y2S7	POLDIP2	0	0	0	0	0	1	0	0	0		2
O95602	POLR1A	0	0	0	0	0	0	0	1	0		2
Q9NQ55	PPAN	0	0	0	0	1	1	0	0	0	3	0		-4
Q96T49	PPP1R16B	1	1	0	0	0	1	0	0	1		0		-4
Q13362	PPP2R5C	0	1	0	0	0	0	0	0	0		2
P16298	PPP3CB	0	0	0	0	1	1	0	0	0	2	0		-4
O60831	PRAF2	1	1	0	0	1	1	1	1	0		2														-151	AAPDPCDPQRW	δαδδπβθβββλ
O43900	PRICKLE3	1	1	0	0	0	0	0	0	0		0	-4
P17612	PRKACA	0	0	0	0	0	0	1	1	0		2
P78527	PRKDC	0	0	0	0	1	1	0	0	0		2
Q5VTL8	PRPF38B	0	0	0	0	1	1	0	0	0		2
Q14558	PRPSAP1	0	0	0	0	0	0	1	1	0		2													-153		HGEAQCTELDM	αφδπδδπβρπγ
Q96M27	PRRC1	0	0	0	0	0	1	0	0	0		2											-98		-98		WFDIGCLVVED	ιωικικιωιδγ
P49768	PSEN1	0	0	0	0	0	0	1	1	0		2
O75832	PSMD10	0	0	0	0	0	1	0	0	0		2
P61289	PSME3	0	0	0	0	1	1	0	1	0		2
O43586	PSTPIP1	0	1	0	0	0	0	0	0	0		2
Q9H7Z7	PTGES2	0	0	0	0	0	1	0	0	0		2													-362		LWPGGCALAWR	λδβδπαδδδδδ
Q93096	PTP4A1	1	1	0	0	1	1	0	0	1		0		-4
Q12974	PTP4A2	1	1	0	0	1	1	0	0	1		0		-4
Q14761	PTPRCAP	0	0	1	1	0	0	0	0	0		2
Q9Y3E5	PTRH2	1	1	1	1	0	0	0	0	0		2
Q8TB72	PUM2	0	0	0	0	1	1	1	1	0		2													-898		GMDADCKDFNR	δδδδδδδδδδδ
P15151	PVR	1	0	1	0	0	0	0	0	0	4	1								-3
Q5XKP0	QIL1	0	1	0	0	0	0	0	0	0		2											-59		-59		FSQYVCQQTGL	βχββθθββπβδ
P61026	RAB10	0	0	0	0	0	1	1	1	2		0					[-2, -1]
P62491	RAB11A	0	0	1	1	0	0	1	1	1		0		-4
P61106	RAB14	0	0	1	1	0	0	0	0	1		0			[-3, -1]
Q9NP72	RAB18	0	0	1	1	0	0	0	0	1		0		-4
A4D1S5	RAB19	0	0	0	1	0	0	0	0	1		0			[-3, -1]
Q9H0U4	RAB1B	0	0	0	0	0	1	1	0	2		0					[-2, -1]
Q9UL25	RAB21	0	0	1	1	0	0	0	0	1		0		-4
Q969Q5	RAB24	0	0	0	0	0	0	1	1	1		0		-4
P51159	RAB27A	0	0	1	1	1	0	1	0	2		0			[-3, -1]
P51157	RAB28	0	1	0	0	1	1	0	0	1		0	-4
P61019	RAB2A	0	0	1	1	0	0	0	0	1		0					[-2, -1]
Q8WUD1	RAB2B	0	0	1	1	0	0	1	1	1		0					[-2, -1]
Q14088	RAB33A	0	0	0	1	1	1	1	0	2		0			[-3, -1]
Q9H082	RAB33B	0	0	0	0	0	0	1	1	1		0			[-3, -1]
Q9BZG1	RAB34	0	0	0	0	0	0	0	1	1		0				[-3, -2]
O95716	RAB3D	0	0	0	0	0	0	1	0	1		0			[-3, -1]
Q15042	RAB3GAP1	0	0	0	0	0	1	0	0	0		2
Q9H2M9	RAB3GAP2	0	0	0	0	1	1	0	1	0		2													-58		LPPTLCTWLKA	αδπβλνβσσββ
Q96S21	RAB40C	0	0	0	0	0	1	0	0	2		0		-4
Q86YS6	RAB43	0	0	0	0	1	1	1	1	2		0			[-3, -1]
P61018	RAB4B	0	0	1	1	0	0	1	1	1		0			[-3, -1]
P20340	RAB6A	0	0	0	0	0	1	0	0	2		0			[-3, -1]
P51149	RAB7A	0	0	1	1	0	0	0	0	1		0			[-3, -1]
P61006	RAB8A	0	0	1	1	0	1	1	1	2		0	-4
Q92930	RAB8B	0	1	1	1	1	1	1	1	2		0		-4
P51151	RAB9A	0	0	1	1	0	0	0	0	1		0					[-2, -1]
Q9UI14	RABAC1	0	1	0	1	0	0	1	1	0		2													-122		NLGELCQRLVR	δββσλββλλβχ
Q9Y3P9	RABGAP1	0	1	0	0	0	0	0	0	0		0						-1
P63000	RAC1	0	1	1	1	0	1	0	0	2		0	-4
P15153	RAC2	0	0	1	1	0	1	0	0	2		0		-4
P04049	RAF1	0	0	0	0	1	1	0	0	0		2
P11233	RALA	1	1	1	1	1	1	0	0	2		0		-4
P11234	RALB	0	1	1	1	1	1	1	1	2		0		-4
P61224	RAP1B	0	0	0	0	0	1	1	0	2		0		-4
P10114	RAP2A	1	1	0	0	1	1	0	0	1		0		-4
P61225	RAP2B	1	1	1	1	0	1	0	0	2		0	-4
Q9Y3L5	RAP2C	1	1	0	0	1	1	0	0	2		0	-4
P54136	RARS	0	0	0	0	1	0	0	0	0		2
Q8TC12	RDH11	0	1	0	0	1	0	0	0	0		2														-186	AGVMMCPYSKT	δφααλδδφδηρ
Q9H6H4	REEP4	1	1	0	0	0	0	0	0	0		2													-58		DTEDECWSDTE	δδπππδπππδδ
Q00765	REEP5	1	1	1	1	1	1	1	1	0	2	1								-3
P40937	RFC5	0	0	0	0	1	1	0	0	0		2													-103		ETVYTCTGHPL	βσσθλσβλαδδ
Q96AA3	RFT1	0	0	0	0	1	1	1	1	0		2
P49795	RGS19	0	0	0	0	0	0	1	1	0		2
Q8TEB9	RHBDD1	0	0	0	0	1	1	1	1	0		2													-99		KIMEACAGGFS	ββσθβββπβππ
Q6NTF9	RHBDD2	0	0	0	0	0	0	1	0	0		2
Q6PJF5	RHBDF2	0	0	1	1	0	0	0	0	0		2
Q15382	RHEB	1	1	0	0	1	1	0	0	1		0		-4
P61586	RHOA	1	1	1	1	0	1	0	0	2		0	-4
P62745	RHOB	0	0	0	0	0	1	0	0	2		0		-4
P08134	RHOC	0	0	1	0	0	1	0	0	2		0		-4
P84095	RHOG	0	0	1	1	0	1	0	0	2		0	-4
Q15669	RHOH	1	1	0	0	1	1	0	0	2		0		-4
Q96TC7	RMDN3	0	0	0	0	0	0	0	1	0		2
Q9BWH6	RPAP1	0	0	0	0	1	1	1	1	0		2
P62070	RRAS2	1	1	0	0	0	1	0	0	1		0	-4
P23921	RRM1	1	1	0	0	0	0	0	0	0		1								-3
O95197	RTN3	1	1	0	0	1	1	1	1	0		2
Q9NQC3	RTN4	1	1	1	1	0	0	0	0	0		2
Q96T51	RUFY1	0	1	0	0	0	0	0	0	0		2
O95977	S1PR4	0	0	0	0	0	0	1	1	0		2														-372	VAPESCQQLAA	δπλββλββθββ
Q9NTJ5	SACM1L	0	0	0	0	0	0	1	1	0		2													-565		FYVEACDDGAD	ιωιαρππππγχ
Q96BY9	SARAF	0	1	0	1	0	0	0	0	0		2
O15126	SCAMP1	1	1	1	1	1	1	1	1	0		2													-207		FPVGPCFYQDF	δπδδρπηδδδλ
O15127	SCAMP2	1	1	1	1	1	1	1	1	0		2
O14828	SCAMP3	1	1	1	1	1	1	1	0	0		2
Q969E2	SCAMP4	0	0	0	0	0	0	1	1	0		2													-210		IPVKPCFYQNF	ππδγρπδδδδλ
P22307	SCP2	1	1	0	0	1	1	0	0	0	3	1									-2
Q99643	SDHC	1	0	0	0	1	1	0	0	0		2
O14521	SDHD	0	0	0	0	1	1	0	1	0		2
P67812	SEC11A	0	1	0	0	1	1	0	0	0	3	2
Q15437	SEC23B	1	1	0	0	1	1	0	0	0		0						-1
P60468	SEC61B	1	1	1	1	0	0	0	0	0		2											-58		-58		RKNASCGTRSA	πδδδδδδδπππ
P60059	SEC61G	0	0	0	0	1	1	0	0	0		2											-44		-44		RLVKRCTKPDR	ββββπδδδδδπ
Q99442	SEC62	1	0	1	1	0	0	1	1	0		2													-21		QTDGDCEEDEE	βππδδδδδδδδ
Q9UGP8	SEC63	0	0	0	0	1	1	1	1	0		2													-271		KEQSICAAEEQ	βσβββββββπδ
Q14242	SELPLG	0	0	0	0	1	1	1	1	0		2													-49		PTEMVCISSLL	πββππππββππ
Q9NRX5	SERINC1	0	0	0	0	0	1	0	0	0		2													-261		EGNSRCWYAAL	βηββββσβββλ
Q13530	SERINC3	0	0	0	0	0	0	1	1	0		2
O95562	SFT2D2	1	1	1	1	0	1	0	0	0		1								-3
Q9H9B4	SFXN1	0	0	0	0	0	1	0	0	0		2
O43765	SGTA	0	0	0	0	1	1	0	0	0		2													-276		EVAIQCLETAF	βββσββσθββν
Q99720	SIGMAR1	1	1	1	1	0	0	0	0	0		2											-130		-130		WMGAMCLLHAS	ωιωικτωταδδ
Q9Y3P8	SIT1	1	0	0	0	0	0	0	0	0		2
Q9UHW9	SLC12A6	0	0	0	0	0	0	0	1	0		2													-212		KVWRKCSIRIF	ρρνβρψαψεψε
Q8N697	SLC15A4	0	0	0	0	0	0	1	1	0		2														-164	MFFVMCSAFAA	λβλσλβλλλλβ
P53985	SLC16A1	0	1	0	1	1	1	1	1	0	2	0						-1
O15427	SLC16A3	0	0	0	0	0	1	0	0	0		2													-57		LGNFFCIRKKP	βσθβββββππδ
O60669	SLC16A7	0	0	1	1	0	0	0	0	0		2
P41440	SLC19A1	0	0	0	0	0	0	1	1	0	3	1								-3
P43007	SLC1A4	0	0	0	0	1	1	0	0	0		2
Q15758	SLC1A5	1	1	0	0	1	0	0	0	0		2
Q9UBX3	SLC25A10	0	0	0	0	1	1	0	1	0		2														-48	QGVFHCAVETA	πδσβσσσββχθ
Q9UJS0	SLC25A13	0	0	0	0	1	0	0	0	0		2
Q9HC21	SLC25A19	0	0	0	0	1	1	1	1	0		2
O43772	SLC25A20	0	0	0	0	1	1	1	1	0		2														-147	TGTLDCAKKLY	πγσβρσσββχθ
Q9H936	SLC25A22	0	0	0	0	1	1	1	1	0		2
Q8TBP6	SLC25A40	0	0	0	0	1	1	0	0	0		2
Q99808	SLC29A1	0	0	0	1	1	1	1	1	0		2
P11166	SLC2A1	0	0	0	0	1	1	1	1	0		2
P11169	SLC2A3	0	1	1	1	1	1	0	1	0		2
Q9Y6M5	SLC30A1	1	1	0	0	1	1	0	0	0		2
P78383	SLC35B1	0	0	0	0	0	0	1	1	0		2														-180	LAKYLCVLLIV	πλλβλλσθλχσ
Q8TB61	SLC35B2	0	0	0	0	0	1	0	0	0		2
Q96QD8	SLC38A2	0	0	1	0	0	1	0	0	0		2													-104		VTHLLCASKDF	βθθβππβδδδδ
Q8WUX1	SLC38A5	0	0	0	0	0	0	1	1	0		2														-80	NVLVICVPTIR	σββσβπδλδσσ
Q8NBW4	SLC38A9	0	0	0	0	0	0	1	1	0		2
P08195	SLC3A2	0	0	0	0	1	1	0	0	0		2
Q8NBI5	SLC43A3	0	0	0	0	1	1	0	0	0		2													-266		YSYGLCPGNGT	δδγγπππδδδδ
Q8WWI5	SLC44A1	1	1	1	1	0	0	0	0	0		2
Q8IWA5	SLC44A2	1	1	0	0	0	0	0	0	0		2													-428		YGIFHCYMEYS	βλλββλββλλβ
P53794	SLC5A3	0	0	0	0	0	0	1	1	0		2
Q01650	SLC7A5	0	1	0	0	1	1	1	1	0		2
P0DJ93	SMIM13	1	1	1	1	0	0	0	0	0		2											-67		-67		LLLMVCGWYFV	βθθββθβββββ
O60906	SMPD2	0	1	0	0	0	0	0	0	0		2													-82		LLALLCVLAAG	λλββλββλλββ
O00161	SNAP23	1	1	0	0	0	0	0	0	0		2													-100		GENSPCNVVSK	ηπππππββπππ
Q9H3E2	SNX25	0	0	0	0	1	1	1	1	0		2
Q07889	SOS1	0	0	0	0	0	0	0	1	0		2													-232		STTDVCSVFDS	δδδδδδδδδδδ
Q9Y6A9	SPCS1	0	0	0	0	0	0	1	1	0		2
Q96EA4	SPDL1	0	1	0	0	0	0	0	0	0		0		-4
Q9Y6N5	SQRDL	0	0	0	0	1	0	0	0	0		2													-433		AQLFACLLRLG	δδδδδδδδδδδ
Q96SB4	SRPK1	0	0	0	0	1	1	0	0	0		2
Q9Y5M8	SRPRB	0	0	0	1	0	0	0	0	0		2
P15907	ST6GAL1	0	0	0	0	1	1	1	1	0		0						-1
O95772	STARD3NL	0	0	0	0	0	0	1	1	0		2
Q15831	STK11	0	1	0	0	0	0	0	0	1		0		-4
Q9UEW8	STK39	0	0	0	0	1	1	0	1	0		2
Q7RTN6	STRADA	0	0	0	0	1	1	1	1	0	2	0		-4
Q96SI9	STRBP	0	0	0	0	1	1	1	1	0		2													-210		DADIECMSSDE	πδπδδδδδδδδ
P08842	STS	0	1	0	0	0	0	0	0	0		2													-379		LAALNCLGLLH	βββθθββββδδ
Q8TCJ2	STT3B	1	0	1	1	0	0	0	0	0		2
O75558	STX11	1	1	1	1	0	0	0	0	0		1								-3
Q9P2W9	STX18	0	0	0	0	0	0	1	0	0		2													-13		FFLVMCSFSLL	βββββββββββ
Q13190	STX5	0	0	0	0	0	1	0	0	0	3	0						-1
O15400	STX7	0	1	0	0	0	0	1	1	0	2	0		-4
Q9UNK0	STX8	1	1	0	0	0	0	0	0	0		2
Q9P2R7	SUCLA2	0	0	0	0	0	0	0	1	0		2
Q8NBK3	SUMF1	0	0	0	0	1	0	0	0	0	3	1								-3
O94901	SUN1	0	0	0	0	0	0	1	1	0		2													-723		LATTACTLGDG
Q9Y5B9	SUPT16H	0	0	0	0	1	1	1	1	0		2													-474		RINFYCPGSAL	κταγδαπππδπ
Q15022	SUZ12	0	1	0	0	0	0	0	0	0		2
Q8WXH0	SYNE2	0	0	0	0	1	1	1	1	0	8	1							-5
O43760	SYNGR2	1	1	1	1	0	0	0	0	0		2
Q16563	SYPL1	0	0	0	0	1	1	1	1	0		2
Q86TM6	SYVN1	0	0	0	0	0	0	1	1	0		2
Q03518	TAP1	1	1	0	0	0	0	0	0	0		2													-737		PAPRGCRCLPG
Q9UPU7	TBC1D2B	0	0	0	0	0	1	0	0	0		2
Q15813	TBCE	0	0	0	0	1	1	0	0	0		2													-6		VENGDCLLVRW	νηηψιψμψιψδ
Q9UHD2	TBK1	0	0	0	0	0	1	0	0	0		1									-2
Q9BZK7	TBL1XR1	0	0	0	0	1	1	0	1	0		2														-301	LVLRHCIREGG	αιχφδφδδδπν
Q969Z0	TBRG4	0	0	0	0	0	0	1	1	0		2
Q13488	TCIRG1	0	0	0	0	0	0	1	1	0		2
Q9NZ01	TECR	1	0	1	1	0	0	0	0	0		2													-291		TREKLCFLDKV	πρητλδιδγγη
P02786	TFRC	0	0	0	0	0	0	1	1	0		2
Q13009	TIAM1	0	0	0	0	0	0	1	1	0		2
P62072	TIMM10	0	0	0	0	1	1	0	1	0		2
Q5SRD1	TIMM23B	0	0	0	0	0	0	0	1	0		2
O43615	TIMM44	0	0	0	0	1	1	0	0	0		2
O15321	TM9SF1	0	0	0	0	0	0	1	1	0		2
Q92544	TM9SF4	0	0	0	0	1	1	1	1	0		2													-624		LFSLMCETSAF	ββββπππππδδ
Q969X1	TMBIM1	1	1	1	1	0	0	1	1	0		2														-158	LILACCQGPRR	θθθρππλπλθλ
P55061	TMBIM6	1	0	1	1	0	0	0	0	0		2
Q7Z403	TMC6	0	0	0	0	1	1	0	0	0	4	1								-3
Q7Z7H5	TMED4	0	0	0	0	0	1	0	0	0		2													-205		LLLALCATGAQ	ββββββββπδδ
Q9Y3A6	TMED5	0	0	0	0	0	0	1	1	0		2
Q9Y3B3	TMED7	0	0	0	0	0	0	0	1	0		2
Q8N131	TMEM123	1	1	1	1	0	0	0	0	0		2											-22		-22		ILYIGCKMYYS	βββββββββββ
Q9BVK8	TMEM147	1	0	1	1	1	1	0	1	0		2													-35		TFVHLCSLGSW	ββθββββδδσβ
Q9HC07	TMEM165	0	0	0	0	1	1	0	0	0		2
Q8TBQ9	TMEM167A	0	0	0	0	1	0	0	0	0		2														-27	GIFWKCARIGE	ββσνββσββθβ
Q9NVA4	TMEM184C	0	0	0	0	0	0	1	1	0		2													-113		AEEGSCFDSFL	πδρδδσββσββ
A5PLL7	TMEM189	0	0	0	0	1	1	0	0	0		2
Q9UHN6	TMEM2	0	0	0	0	0	1	0	0	0		2
Q5SNT2	TMEM201	0	1	0	1	0	0	0	0	0		2
Q6UW68	TMEM205	0	0	0	0	1	1	1	1	0		2
Q96SK2	TMEM209	0	0	0	0	0	0	1	1	0		2
Q6NUQ4	TMEM214	1	1	1	1	1	1	1	1	0		2													-110		FLSAHCASHLA	βββββββββλβ
Q9H0R3	TMEM222	1	1	1	1	1	1	1	1	0		2
Q9H330	TMEM245	0	0	0	0	1	1	1	1	0		2
Q8N2U0	TMEM256	1	1	0	0	1	1	1	1	0		2
Q96HV5	TMEM41A	0	0	0	0	1	1	1	1	0		2
Q5BJD5	TMEM41B	1	1	1	1	0	0	1	1	0		2
Q9BTV4	TMEM43	1	0	1	0	1	0	0	0	0		2											-47		-47		KAFAFCVATSL	σλβσνλβσχλβ
O95807	TMEM50A	0	0	1	1	0	0	1	1	0		2
Q86T03	TMEM55B	1	1	1	1	1	1	1	1	0	3	1									-2
Q6PI78	TMEM65	0	0	0	0	0	0	1	1	0		2
Q9BUB7	TMEM70	0	0	0	0	0	0	0	1	0		2
Q8NBN3	TMEM87A	0	0	0	0	0	0	0	1	0	2	0						-1
Q5BJF2	TMEM97	1	1	1	1	1	1	1	1	0		2
Q9BVT8	TMUB1	0	0	0	0	0	0	1	1	0		2
Q9H3N1	TMX1	1	1	1	1	1	1	1	1	0		2													-116		MWIRTCHNYFI	ββλββχλθθθθ
Q96JJ7	TMX3	0	1	0	0	0	0	0	0	0		2													-431		LDMVVCKGFVE	βββββλββχαα
Q93038	TNFRSF25	0	0	1	0	0	0	0	0	0	4	1							-5
P43489	TNFRSF4	0	0	0	0	1	1	0	0	0		2
Q9Y5L0	TNPO3	0	0	0	0	1	1	0	0	0		2														-864	QDVESCYFAAQ	πδδσσβλσσλλ
Q15388	TOMM20	0	0	0	0	0	0	1	1	0		2													-46		NAIAVCGQPQQ	βσλβσδπθνπβ
O96008	TOMM40	0	0	0	0	1	1	0	0	0		2
O95985	TOP3B	0	0	0	0	1	1	0	1	0	3	1									-2
P67936	TPM4	1	1	0	0	0	0	0	0	0		1									-2
Q15629	TRAM1	1	0	1	1	1	1	1	0	0		2													-346		ADIVSCVAMVF	λββλβββλββλ
Q9Y2L5	TRAPPC8	0	1	0	0	0	0	0	0	0		2
Q8IWR1	TRIM59	0	0	0	0	0	0	1	1	0		2
Q9Y5S1	TRPV2	0	0	0	0	1	1	0	1	0		2
Q9Y4A5	TRRAP	0	0	0	0	1	0	0	0	0		2
Q8NG11	TSPAN14	1	1	1	1	1	1	1	1	0		2
Q12999	TSPAN31	0	0	1	1	0	0	0	0	0		2														-208	MVCGGFAC
P30536	TSPO	0	0	0	0	1	1	0	0	0		2
Q53HC9	TSSC1	0	0	0	0	1	1	0	0	0		2
Q96CW5	TUBGCP3	0	0	0	0	1	1	1	1	0	2	1									-2
Q2T9J0	TYSND1	1	1	0	0	0	0	0	0	0		2
Q9C0C9	UBE2O	0	0	0	0	1	1	0	0	0		1							-5
O95164	UBL3	0	0	0	0	0	1	0	0	2		0	-4
Q9UMX0	UBQLN1	1	1	0	0	0	0	0	0	0	4	2											-28
Q8N806	UBR7	1	1	0	0	1	1	0	0	0		1									-2
Q92575	UBXN4	0	0	0	0	1	1	1	1	0		2
Q6PHR2	ULK3	1	1	0	0	1	1	0	0	1		0		-4
Q9UDW1	UQCR10	0	0	0	0	1	1	0	0	0	2	2											-9
P54578	USP14	0	0	0	0	1	1	1	1	0		2														-238	ETTMKCTESEE	ωκωκδφππδππ
A6NNY8	USP27X	0	0	0	0	0	1	0	0	0		2
Q8TED0	UTP15	0	0	0	0	1	1	1	1	0		2													-134		VLDPTCTIKTP	θλππβνλβππβ
P63027	VAMP2	0	0	0	0	0	0	1	1	0		2											-14		-14		ILGVICAIILI	βββββββββββ
Q9BV40	VAMP8	1	0	0	0	1	1	0	1	0		2											-20		-20		MIVLICVIVFI	βββββββββββ
Q8TAA9	VANGL1	0	0	0	1	0	0	0	0	0		2
P21796	VDAC1	1	1	0	0	0	1	0	0	0		2
P45880	VDAC2	1	1	1	1	1	1	0	1	0		2													-68		TSGTNCTRFGI	γππβρδικικι
Q9Y277	VDAC3	0	0	0	0	0	1	0	0	0		2													-55		KYMLDCRTSLS	κγδπδπφωιωι
Q9BQE4	VIMP	0	1	0	0	0	0	0	0	0		2
Q9BQB6	VKORC1	1	0	0	0	0	0	0	0	0		2														-68	QLLLGCLRTRW	λρβλσγγλδλβ
Q96GC9	VMP1	0	0	0	1	0	0	0	0	0		2
Q96JC1	VPS39	0	0	0	0	0	0	1	1	0		2													-828		PESGSCNRFEV	πππδππρδιδι
Q9UNX4	WDR3	0	0	0	0	1	1	0	0	0		2
Q8TAF3	WDR48	0	0	0	0	1	1	0	0	0		2
Q6PJI9	WDR59	1	1	0	1	0	0	0	0	0		2													-184		TSSGSCSSMSD	δδδδδδδδδπδ
Q8N5D0	WDTC1	1	1	0	0	0	1	0	0	0		0		-4
O14980	XPO1	0	0	0	0	1	0	1	0	0		1									-2
Q9GZM5	YIPF3	0	0	0	0	0	0	1	1	0		2														-142	FLAYLCNAQIT	βλθββλβφπδδ
Q969M3	YIPF5	0	0	0	0	1	1	0	0	0		2
O15498	YKT6	1	1	0	1	1	1	0	0	2		0	-4
O15391	YY2	0	0	0	0	1	1	0	0	0		2													-282		EVVGYCDSDNQ	ππππππβπβππ
P43403	ZAP70	0	1	0	0	1	0	0	0	0		1									-2
Q7Z2W4	ZC3HAV1	1	1	0	0	0	1	0	0	0		0	-4
Q5W0Z9	ZDHHC20	0	0	1	1	0	0	0	0	0		2														-328	YVVELCVFTIF	θλπλπλπθπθβ
Q9NYG2	ZDHHC3	1	1	1	1	0	0	0	0	0		2
Q9C0B5	ZDHHC5	0	0	1	1	0	0	0	0	0		2														-680	FFAFTCPGLSL	θββχχλβλθθβ
Q9H6R6	ZDHHC6	0	0	0	0	0	0	1	1	0		2													-409		MGTFCSVIKF
Q8WV99	ZFAND2B	1	1	0	0	0	1	0	0	2		0		-4
Q14593	ZNF273	0	0	0	0	1	1	0	0	0		2
P0CG31	ZNF286B	0	0	0	0	0	0	0	1	0		2
P13682	ZNF35	0	1	0	0	0	0	0	0	0		2
Q8NB42	ZNF527	0	0	0	0	1	1	0	0	0		2
Q9HCE3	ZNF532	0	0	0	0	1	1	0	0	0		2													-1015		AASDSCKEPVA	ββπππδδδδδδ
A6NN14	ZNF729	0	0	0	0	0	0	0	1	0		1							-5
Q8N393	ZNF786	1	0	0	0	0	0	0	0	0		2
Q9H900	ZWILCH	0	0	0	0	1	1	0	0	0		2													-585		WERLNCAAEDF	λββλχβλλχβλ
